# Supplementary material for: Prosapip1 (encoded by the Lzts3 gene) in the dorsal hippocampus mediates synaptic protein composition, long-term potentiation, and spatial memory
Source: eLife journal article supplement (doi:10.7554/elife.100653), 2024-10-03
Supplement: fig1-data1 [file Figure 1 - Source Data 1.xlsx]

## Sheet: Figure 1D
	Figure 1, Source Data 1. Original membranes corresponding to Figure 1D.

## Sheet: Figure 1E
	1E - Litter Size of Prosapip1(flx/flx);Syn1-Cre Mating
	Histogram
	Litter size	Number of values
	1	3
	2	4
	3	4
	4	8
	5	19
	6	15
	7	12
	8	7
	9	1
	10	2
	11	1

## Sheet: Figure 1F and 1G
	1F - Sex
	Male	185
	Female	173
	1G - Genotype
	Prosapip1 (flx/flx);Syn1-Cre(-)	151
	Prosapip1 (flx/flx);Syn1-Cre(+)	168

## Sheet: Figure 1I
	1I - Total Distance
	Prosapip1(flx/flx);Syn1-Cre(-)	Prosapip1(flx/flx);Syn1-Cre(+)
	6617.29	13113.5
	9232.65	10165.7
	5322.78	9414.56
	7179.37	8255.96
	9625.76	10849.5
	9103.26	11268.4
	8007.98	10985.9
	8261.51	6929.92
	10062.5	7049.82
	6467.73	8347.02
	7576.62	4550.03
	9011.23	5616.92
	7798.37	6349.78
	8789.79	9966.75
	8805.16	11510.7
	7585.76	8597.87
	9435.46	12919.7
	9893.24	9743.88
	10254.8	9059.39
	9907.06	8783.75
	8066.46	10120.4
	7885.45

## Sheet: Figure 1J
	1J - Total spent in center
	Prosapip1(flx/flx);Syn1-Cre(-)	Prosapip1(flx/flx);Syn1-Cre(+)
	162.332	146.465
	73.8993	273.897
	87.6325	121.965
	114.866	268.364
	83.9658	101.332
	154.998	172.798
	166.232	104.066
	161.198	68.7993
	121.432	90.5991
	129.965	139.265
	160.832	49.1995
	174.632	143.299
	164.698	44.1996
	108.732	163.165
	97.2324	142.732
	111.432	53.1995
	55.8328	86.5658
	95.4324	115.132
	138.932	163.832
	215.465	283.397
	221.898	127.632
	130.799
