# Supplementary material for: Prosapip1 (encoded by the Lzts3 gene) in the dorsal hippocampus mediates synaptic protein composition, long-term potentiation, and spatial memory
Source: eLife journal article supplement (doi:10.7554/elife.100653), 2024-10-03
Supplement: fig3-data1 [file Figure 3 - Source Data 1.xlsx]

## Sheet: Statistics
Figure panel	Statistic		Data												Raw Statistics
Panel d	t(17) = 3.933		Ctrl	KO											t-test	Monday, January 01, 2024, 11:51:14 PM
	p = 0.001		155.659	98.1154
			134.393	98.4205											Data source: Data 1 in Notebook1
			173.004	98.0132
			170.169	108.265											Normality Test (Shapiro-Wilk)	Passed	(P = 0.373)
			119.248	110.614
			145.184	108.24											Equal Variance Test:	Passed	(P = 0.339)
			119.973	145.338
			118.567	101.038											Group Name	N	Missing	Mean	Std Dev	SEM
			149.185	128.411											Ctrl	10	0	144.805	20.979	6.634
			162.662												KO	9	0	110.717	16.159	5.386
															Difference	34.087
															t = 3.933 with 17 degrees of freedom.
															95 percent two-tailed confidence interval for difference of means: 15.800 to 52.375
															Two-tailed P-value = 0.00107
															The difference in the mean values of the two groups is greater than would be expected by chance; there is a statistically significant difference between the input groups (P = 0.001).
															One-tailed P-value = 0.000537
															The sample mean of group Ctrl exceeds the sample mean of group KO by an amount that is greater than would be expected by chance, rejecting the hypothesis that the population mean of group KO is greater than or equal to the population mean of group Ctrl. (P = <0.001).
															Power of performed two-tailed test with alpha = 0.050: 0.959
															Power of performed one-tailed test with alpha = 0.050: 0.983
Panel e	F(1,23) = 4.565
	p = 0.044		Data							Indexed Data
					0.2	0.4	0.6	0.9		KO1	KO	0.2	-19.0853		Two Way Repeated Measures ANOVA (One Factor Repetition)	Monday, January 01, 2024, 11:24:08 PM
			KO	KO1	-19.0853	-16.0263	-20.9284	-25.3489		KO2	KO	0.2	-22.0172
			KO	KO2	-22.0172	-24.6032	-30.0888	-62.237		KO3	KO	0.2	-28.3067		Data source: Data 1 in Notebook1
			KO	KO3	-28.3067	-57.6999	-122.764	-370.416		KO4	KO	0.2	-50.4668
			KO	KO4	-50.4668	-114.347	-97.5488	-91.0834		KO5	KO	0.2	-34.9005		General Linear Model
			KO	KO5	-34.9005	-99.7821	-234.52	-432.792		KO6	KO	0.2	-35.488
			KO	KO6	-35.488	-69.1055	-141.185	-305.281		KO7	KO	0.2	-45.0242		Dependent Variable: Data
			KO	KO7	-45.0242	-65.417	-66.3902	-93.4		KO8	KO	0.2	-51.6409
			KO	KO8	-51.6409	-51.9857	-89.4408	-180.656		KO9	KO	0.2	-17.7729		Normality Test (Shapiro-Wilk)	Failed	(P < 0.050)
			KO	KO9	-17.7729	-22.0122	-25.3489	-34.4261		KO11	KO	0.2	-26.4193
			KO	KO11	-26.4193	-53.5578	-104.256	-182.908		KO12	KO	0.2	-9.47153		Equal Variance Test:	Passed	(P = 0.093)
			KO	KO12	-9.47153	-77.9626	-717.528	-883.364		Ctrl1	Ctrl	0.2	-13.0054
			Ctrl	Ctrl1	-13.0054	-14.7201	-14.7996	-34.8436		Ctrl2	Ctrl	0.2	-25.1625		Source of Variation	DF	SS	MS	F	P
			Ctrl	Ctrl2	-25.1625	-19.4468	-19.7512	-46.3329		Ctrl3	Ctrl	0.2	-20.1993		Group	1	2.04446e+06	2.04446e+06	4.565	0.044
			Ctrl	Ctrl3	-20.1993	-48.3913	-230.014	-231.757		Ctrl4	Ctrl	0.2	-64.0348		Subject ID(Group)	23	1.03013e+07	447884
			Ctrl	Ctrl4	-64.0348	-120.023	-158.423	-136.108		Ctrl5	Ctrl	0.2	-143.2		Intensity	3	1.1735e+06	391166	9.441	<0.001
			Ctrl	Ctrl5	-143.2	-1451.81	-927.067	-633.809		Ctrl6	Ctrl	0.2	-21.2238		Group x Intensity	3	170994	56998.1	1.376	0.258
			Ctrl	Ctrl6	-21.2238	-16.9739	-16.1548	-31.4295		Ctrl7	Ctrl	0.2	-25.8456		Residual	69	2.85899e+06	41434.6
			Ctrl	Ctrl7	-25.8456	-29.9756	-41.191	-37.0355		Ctrl8	Ctrl	0.2	-27.9332		Total	99	1.66504e+07	168186
			Ctrl	Ctrl8	-27.9332	-1065.23	-1277.61	-1192.91		Ctrl9	Ctrl	0.2	-29.7052
			Ctrl	Ctrl9	-29.7052	-44.1888	-42.7647	-78.988		Ctrl10	Ctrl	0.2	-81.9031
			Ctrl	Ctrl10	-81.9031	-155.986	-404.614	-570.226		Ctrl11	Ctrl	0.2	-85.2738		The difference in the mean values among the different levels of Group is greater than would be expected by chance after allowing for effects of differences in Intensity. There is a statistically significant difference (P = 0.044). To isolate which group(s) differ from the others use a multiple comparison procedure.
			Ctrl	Ctrl11	-85.2738	-501.258	-935.069	-1304.02		Ctrl12	Ctrl	0.2	-1004.95
			Ctrl	Ctrl12	-1004.95	-1004.51	-1157.64	-1497.63		Ctrl13	Ctrl	0.2	-116.767		The difference in the mean values among the different levels of Intensity is greater than would be expected by chance after allowing for effects of differences in Group. There is a statistically significant difference (P = <0.001). To isolate which group(s) differ from the others use a multiple comparison procedure.
			Ctrl	Ctrl13	-116.767	-382.944	-372.153	-476.935		Ctrl14	Ctrl	0.2	-816.842
			Ctrl	Ctrl14	-816.842	-950.633	-1205.01	-1526.24		KO1	KO	0.4	-16.0263		The effect of different levels of Group does not depend on what level of Intensity is present. There is not a statistically significant interaction between Group and Intensity. (P = 0.258)
										KO2	KO	0.4	-24.6032
										KO3	KO	0.4	-57.6999		Power of performed test with alpha = 0.0500: for Group : 0.428
										KO4	KO	0.4	-114.347		Power of performed test with alpha = 0.0500: for Intensity : 0.995
										KO5	KO	0.4	-99.7821		Power of performed test with alpha = 0.0500: for Group x Intensity : 0.117
										KO6	KO	0.4	-69.1055
										KO7	KO	0.4	-65.417		Expected Mean Squares:
										KO8	KO	0.4	-51.9857		Approximate DF Residual for Group = 23.000
										KO9	KO	0.4	-22.0122
										KO11	KO	0.4	-53.5578		Expected MS(Group) = var(res) + 4.000 var(Subject ID(Group)) + var(Group)
										KO12	KO	0.4	-77.9626		Expected MS(Subject ID(Group)) = var(res) + 4.000 var(Subject ID(Group))
										Ctrl1	Ctrl	0.4	-14.7201		Expected MS(Intensity) = var(res) + var(Intensity)
										Ctrl2	Ctrl	0.4	-19.4468		Expected MS(Group x Intensity) = var(res) + var(Group x Intensity)
										Ctrl3	Ctrl	0.4	-48.3913		Expected MS(Residual) = var(res)
										Ctrl4	Ctrl	0.4	-120.023
										Ctrl5	Ctrl	0.4	-1451.81		Least square means for Group :
										Ctrl6	Ctrl	0.4	-16.9739		Group	Mean	SEM
										Ctrl7	Ctrl	0.4	-29.9756		KO	-120.568	100.892
										Ctrl8	Ctrl	0.4	-1065.23		Ctrl	-408.619	89.431
										Ctrl9	Ctrl	0.4	-44.1888
										Ctrl10	Ctrl	0.4	-155.986
										Ctrl11	Ctrl	0.4	-501.258		Least square means for Intensity :
										Ctrl12	Ctrl	0.4	-1004.51		Group	Mean
										Ctrl13	Ctrl	0.4	-382.944		0.2	-103.912
										Ctrl14	Ctrl	0.4	-950.633		0.4	-237.019
										KO1	KO	0.6	-20.9284		0.6	-317.938
										KO2	KO	0.6	-30.0888		0.9	-399.505
										KO3	KO	0.6	-122.764		Std Err of LS Mean = 76.194
										KO4	KO	0.6	-97.5488
										KO5	KO	0.6	-234.52		Least square means for Group x Intensity :
										KO6	KO	0.6	-141.185		Group	Mean	SEM
										KO7	KO	0.6	-66.3902		KO x 0.200	-30.963	114.036
										KO8	KO	0.6	-89.4408		KO x 0.400	-59.318	114.036
										KO9	KO	0.6	-25.3489		KO x 0.600	-150	114.036
										KO11	KO	0.6	-104.256		KO x 0.900	-241.992	114.036
										KO12	KO	0.6	-717.528		Ctrl x 0.200	-176.86	101.082
										Ctrl1	Ctrl	0.6	-14.7996		Ctrl x 0.400	-414.721	101.082
										Ctrl2	Ctrl	0.6	-19.7512		Ctrl x 0.600	-485.876	101.082
										Ctrl3	Ctrl	0.6	-230.014		Ctrl x 0.900	-557.019	101.082
										Ctrl4	Ctrl	0.6	-158.423
										Ctrl5	Ctrl	0.6	-927.067
										Ctrl6	Ctrl	0.6	-16.1548
										Ctrl7	Ctrl	0.6	-41.191		All Pairwise Multiple Comparison Procedures (Tukey Test):
										Ctrl8	Ctrl	0.6	-1277.61
										Ctrl9	Ctrl	0.6	-42.7647		Comparisons for factor: Group
										Ctrl10	Ctrl	0.6	-404.614		Comparison	Diff of Means	p	q	P	P<0.050
										Ctrl11	Ctrl	0.6	-935.069		KO vs. Ctrl	288.051	2	3.021	0.044	Yes
										Ctrl12	Ctrl	0.6	-1157.64
										Ctrl13	Ctrl	0.6	-372.153
										Ctrl14	Ctrl	0.6	-1205.01		Comparisons for factor: Intensity
										KO1	KO	0.9	-25.3489		Comparison	Diff of Means	p	q	P	P<0.050
										KO2	KO	0.9	-62.237		0.200 vs. 0.900	295.594	4	7.208	<0.001	Yes
										KO3	KO	0.9	-370.416		0.200 vs. 0.600	214.026	4	5.219	0.003	Yes
										KO4	KO	0.9	-91.0834		0.200 vs. 0.400	133.108	4	3.246	0.109	No
										KO5	KO	0.9	-432.792		0.400 vs. 0.900	162.486	4	3.962	0.033	Yes
										KO6	KO	0.9	-305.281		0.400 vs. 0.600	80.918	4	1.973	0.507	No
										KO7	KO	0.9	-93.4		0.600 vs. 0.900	81.568	4	1.989	0.5	No
										KO8	KO	0.9	-180.656
										KO9	KO	0.9	-34.4261
										KO11	KO	0.9	-182.908		Comparisons for factor: Intensity within KO
										KO12	KO	0.9	-883.364		Comparison	Diff of Means	p	q	P	P<0.05
										Ctrl1	Ctrl	0.9	-34.8436		0.200 vs. 0.900	211.029	4	3.438	0.081	No
										Ctrl2	Ctrl	0.9	-46.3329		0.200 vs. 0.600	119.037	4	1.94	0.521	Do Not Test
										Ctrl3	Ctrl	0.9	-231.757		0.200 vs. 0.400	28.355	4	0.462	0.988	Do Not Test
										Ctrl4	Ctrl	0.9	-136.108		0.400 vs. 0.900	182.674	4	2.976	0.162	Do Not Test
										Ctrl5	Ctrl	0.9	-633.809		0.400 vs. 0.600	90.682	4	1.478	0.724	Do Not Test
										Ctrl6	Ctrl	0.9	-31.4295		0.600 vs. 0.900	91.992	4	1.499	0.715	Do Not Test
										Ctrl7	Ctrl	0.9	-37.0355
										Ctrl8	Ctrl	0.9	-1192.91
										Ctrl9	Ctrl	0.9	-78.988		Comparisons for factor: Intensity within Ctrl
										Ctrl10	Ctrl	0.9	-570.226		Comparison	Diff of Means	p	q	P	P<0.05
										Ctrl11	Ctrl	0.9	-1304.02		0.200 vs. 0.900	380.158	4	6.988	<0.001	Yes
										Ctrl12	Ctrl	0.9	-1497.63		0.200 vs. 0.600	309.015	4	5.68	<0.001	Yes
										Ctrl13	Ctrl	0.9	-476.935		0.200 vs. 0.400	237.86	4	4.372	0.015	Yes
										Ctrl14	Ctrl	0.9	-1526.24		0.400 vs. 0.900	142.298	4	2.616	0.26	No
															0.400 vs. 0.600	71.155	4	1.308	0.792	Do Not Test
															0.600 vs. 0.900	71.143	4	1.308	0.792	Do Not Test
															Comparisons for factor: Group within 0.2
															Comparison	Diff of Means	p	q	P	P<0.05
															KO vs. Ctrl	145.897	2	1.354	0.345	No
															Comparisons for factor: Group within 0.4
															Comparison	Diff of Means	p	q	P	P<0.05
															KO vs. Ctrl	355.403	2	3.298	0.025	Yes
															Comparisons for factor: Group within 0.6
															Comparison	Diff of Means	p	q	P	P<0.05
															KO vs. Ctrl	335.876	2	3.117	0.034	Yes
															Comparisons for factor: Group within 0.9
															Comparison	Diff of Means	p	q	P	P<0.05
															KO vs. Ctrl	315.027	2	2.924	0.046	Yes
															A result of "Do Not Test" occurs for a comparison when no significant difference is found between two means that enclose that comparison. For example, if you had four means sorted in order, and found no difference between means 4 vs. 2, then you would not test 4 vs. 3 and 3 vs. 2, but still test 4 vs. 1 and 3 vs. 1 (4 vs. 3 and 3 vs. 2 are enclosed by 4 vs. 2: 4 3 2 1). Note that not testing the …
Panel f	t(22) = 3.094		Ctrl	KO											t-test	Monday, January 01, 2024, 11:44:46 PM
	p = 0.005		64.1508	445.911
			243.988	96.3469											Data source: Data 1 in Notebook1
			699.465	148.088
			692.013	116.649											Normality Test (Shapiro-Wilk)	Passed	(P = 0.394)
			806.297	226.395
			545.827	130.794											Equal Variance Test:	Passed	(P = 0.152)
			1241.77	187.065
			922.818	268.58											Group Name	N	Missing	Mean	Std Dev	SEM
			605.29	44.2663											Ctrl	13	0	634.925	352.965	97.895
			810.888	906.554											KO	11	0	243.492	245.436	74.002
			439.083	107.762
			1063.71												Difference	391.433
			118.72
															t = 3.094 with 22 degrees of freedom.
															95 percent two-tailed confidence interval for difference of means: 129.102 to 653.763
															Two-tailed P-value = 0.00529
															The difference in the mean values of the two groups is greater than would be expected by chance; there is a statistically significant difference between the input groups (P = 0.005).
															One-tailed P-value = 0.00265
															The sample mean of group Ctrl exceeds the sample mean of group KO by an amount that is greater than would be expected by chance, rejecting the hypothesis that the population mean of group KO is greater than or equal to the population mean of group Ctrl. (P = 0.003).
															Power of performed two-tailed test with alpha = 0.050: 0.841
															Power of performed one-tailed test with alpha = 0.050: 0.912
Panel g	t(22) = -2.099		Ctrl	KO											t-test	Tuesday, January 02, 2024, 12:13:40 AM
	p = 0.0475		0.0888	2.0256
			0.7386	1.2731											Data source: Data 1 in Notebook1
			0.6082	1.1156
			0.9737	1.8827											Normality Test (Shapiro-Wilk)	Passed	(P = 0.287)
			1.0272	0.414007
			1.524	0.728354											Equal Variance Test:	Passed	(P = 0.098)
			0.994	3.16795
			0.7	2.44029											Group Name	N	Missing	Mean	Std Dev	SEM
			1.213	0.80155											Ctrl	11	0	0.912	0.374	0.113
			1.13149	1.13054											KO	13	0	1.443	0.764	0.212
			1.02915	1.28665
				0.94133											Difference	-0.531
				1.55294
															t = -2.099 with 22 degrees of freedom.
															95 percent two-tailed confidence interval for difference of means: -1.057 to -0.00644
															Two-tailed P-value = 0.0475
															The difference in the mean values of the two groups is greater than would be expected by chance; there is a statistically significant difference between the input groups (P = 0.047).
															One-tailed P-value = 0.0237
															The sample mean of group KO exceeds the sample mean of group Ctrl by an amount that is greater than would be expected by chance, rejecting the hypothesis that the population mean of group Ctrl is greater than or equal to the population mean of group KO. (P = 0.024).
															Power of performed two-tailed test with alpha = 0.050: 0.519
															Power of performed one-tailed test with alpha = 0.050: 0.651

## Sheet: LTP (C, D)
Panel C						23717000	23717009	23718000	23719000	23719004	23719007	23719011	23719014	23726000	23726009	23726012	23726015	23928000	23928003	23o13006	23o13012	23o13019	23n03051	23n07054	23n07061		23622001	23622006	23720001	23720004	23720008	23720011	23o05000	23o05003	23o05006	23o12001	23o12004	23o14002	23o14008	23n04047	23n04050		23718000	23719000	23719004	23719014	23726009	23o13012	23o13019
Time	Control	10, 6	KO	9, 5		-0.206869	-0.320008	-0.216491	-0.416407	-0.280519	-0.181104	-0.598913	-0.269841	-0.176985	-0.416156	-0.416156	-0.204729	-0.541729	-0.133337	-1.01835	-0.854383	-0.99225	-0.716977	-0.56545	-0.348874		0.191944	-0.399503	-6.53376	-7.96223	-13.1706	-8.98194	-0.0875004	-0.365782	-0.248069	-1.10604	-1.25009	-0.955222	-0.335251	-0.569269	-0.35362		LTP	LTP	LTP	LTP	LTP	LTP	LTP
1	90.7285	2.75919	97.3192	4.70079	0.223111	-0.213623	-0.321332	-0.258382	-0.37493	-0.178746	-0.164795	-0.40089	-0.288222	-0.147502	-0.338236	-0.338236	-0.213623	-0.223796	0.00610352	-1.07263	-0.867051	-0.930779		-0.634122	-0.31027		0.180562	-0.726873	-10.2056	-7.30028	-11.724	-6.53435	-0.0915527	-0.0357492	-0.0816794	-1.04684	-1.1811	-0.890654	-0.283501		-0.40892		119.35	90.0395	63.7197	106.812	81.2763	101.483	93.8049
2	94.3533	1.84772	101.757	3.75056	0.0774809	-0.188192	-0.35903	-0.199382	-0.335693	-0.187465	-0.150553	-0.546542	-0.163891	-0.150553	-0.368754	-0.368754	-0.186496	-0.264486	-0.0170898	-1.08623	-0.791116	-0.913768	-0.648686	-0.65156	-0.326056		0.137329	-0.546542	-7.08292	-7.67128	-11.5918	-5.13413	-0.100708	-0.0959124	-0.115787	-1.07243	-1.23605	-0.860244	-0.263614		-0.409762		92.0968	80.6167	66.828	60.7361	88.6095	92.595	92.0906
3	98.34	1.44458	99.0074	1.47254	0.753073	-0.208537	-0.307869	-0.195312	-0.328427	-0.209263	-0.158691	-0.477878	-0.24301	-0.165812	-0.420888	-0.420888	-0.247531	-0.330607	0.0268555	-1.08766	-0.746633	-0.911259	-0.687541	-0.61004	-0.302881		0.167847	-0.649192	-6.52934	-8.98773	-12.5601	-8.3295	-0.0762939	0.025286	-0.0861673	-1.05998	-1.26771	-0.846905	-0.281818		-0.382824		90.2172	78.8718	74.5987	90.057	101.137	87.3885	91.8377
4	101.478	1.15684	97.6328	1.93307	0.0931137	-0.279744	-0.271965	-0.211589	-0.261579	-0.187465	-0.164795	-0.42794	-0.183105	-0.212606	-0.359853	-0.359853	-0.220405	-0.376383	0.0280762	-1.0971	-0.814965	-0.896437	-0.660006	-0.549524	-0.325444		0.119527	-0.582608	-6.91259	-9.71775	-12.3104	-10.3042	-0.12207	-0.0104632	-0.17772	-1.02254	-1.23637	-0.845727	-0.294574		-0.337368		97.7353	62.8182	66.828	67.8569	86.4706	95.3863	90.3439
5	101.179	2.29259	98.929	1.42732	0.444999	-0.269572	-0.27017	-0.126139	-0.337147	-0.25286	-0.138346	-0.502153	-0.153718	-0.143433	-0.399272	-0.399272	-0.210232	-0.335693	-0.0280762	-1.12958	-0.84643	-0.907634	-0.696734	-0.560942	-0.335082		0.244141	-0.510476	-7.15389	-11.2017	-11.5743	-6.5523	-0.119019	0.00174386	-0.14451	-1.06088	-1.246	-0.856359	-0.271064		-0.322616		58.2653	80.9657	90.1401	56.9663	95.9427	99.0692	91.4723
6	101.722	1.44396	99.5745	2.32215	0.425238	-0.198364	-0.289019	-0.187174	-0.421433	-0.265939	-0.120036	-0.603416	-0.279179	-0.184123	-0.493368	-0.493368	-0.254313	-0.284831	0.0427246	-1.11658	-0.811722	-0.986827	-0.731703	-0.595301	-0.319892		0.157674	-0.6159	-8.37459	-7.15667	-11.9158	-5.74449	-0.128174	-0.177874	-0.215418	-1.02456	-1.27438	-0.890685	-0.264119		-0.376262		86.4582	101.207	94.8026	103.461	118.553	95.0068	99.4535
7	99.4918	1.06908	99.5368	1.83102	0.982515	-0.30009	-0.287224	-0.16276	-0.360398	-0.283377	-0.115967	-0.633933	-0.254313	-0.189209	-0.494639	-0.494639	-0.227186	-0.244141	0.0195312	-1.013	-0.861789	-0.953158	-0.725768	-0.602359	-0.354279		0.165304	-0.510476	-7.43777	-7.33619	-13.6569	-9.19118	-0.152588	-0.0453404	-0.237858	-1.0608	-1.25348	-0.898287	-0.274153		-0.437894		75.181	86.5496	101.019	94.2457	118.859	100.867	96.0603
8	101.798	1.58509	101.472	2.11108	0.901286	-0.228882	-0.371596	-0.138346	-0.332787	-0.261579	-0.170898	-0.582608	-0.181975	-0.18514	-0.338236	-0.338236	-0.16276	-0.254313	0.0256348	-0.963835	-0.861391	-0.976975	-0.710425	-0.573606	-0.290445		0.213623	-0.518799	-7.82102	-10.6512	-12.7452	-8.77829	-0.125122	-0.12643	-0.0834746	-1.13749	-1.18359	-0.907787	-0.288608		-0.429296		63.9039	79.9188	93.2484	67.438	81.2763	100.82	98.4606
9	104.258	1.23604	99.7282	2.03465	0.0681775	-0.188192	-0.384162	-0.205485	-0.412714	-0.2485	-0.107829	-0.585383	-0.219274	-0.137329	-0.363668	-0.363668	-0.152588	-0.325521	0.0585938	-0.982253	-0.90534	-0.952516	-0.724146	-0.617306	-0.350149		0.152588	-0.527122	-6.18868	-9.25101	-13.1558	-7.19856	-0.186157	-0.123814	-0.125661	-1.12756	-1.21497	-0.895764	-0.260385		-0.410756		94.916	99.1132	88.586	81.2607	87.3873	105.964	95.9955
10	104.892	1.25065	102.17	1.82965	0.228153	-0.233968	-0.350952	-0.286865	-0.332787	-0.300816	-0.201416	-0.522267	-0.218144	-0.137329	-0.385284	-0.385284	-0.135634	-0.345866	0.0524902	-0.984425	-0.839562	-0.884153	-0.760522	-0.518487	-0.332695		0.216166	-0.32737	-6.65709	-10.5435	-13.343	-8.61673	-0.167847	-0.17177	-0.126558	-1.10239	-1.27539	-0.863793	-0.273847		-0.359555		132.507	79.9188	107.236	80.8419	92.5816	98.2653	89.1059
11	108.915	11.3751	79.8089	7.14067	0.0499365	-0.213623	-0.385958	-0.229899	-0.364758	-0.279018	-0.172933	-0.554172	-0.261095	-0.149536	-0.372569	-0.372569	-0.193278	-0.345866	-0.00732422	-0.935368	-0.822812	-0.952929	-0.635714	-0.526895	-0.324236		0.307719	-0.366211	-6.75645	-9.05953	-13.3454	-7.88072	-0.146484	-0.168283	-0.113992	-1.11125	-1.30909	-0.888727	-0.290139		-0.380644		106.193	87.5965	99.465	96.7589	89.5261	96.3048	96.0372
12	110.779	7.42751	85.143	7.74709	0.0288611	-0.188192	-0.344669	-0.213623	-0.364758	-0.283377	-0.201416	-0.593706	-0.198929	-0.183105	-0.371297	-0.371297	-0.183105	-0.315348	0.0146484	-0.990376	-0.826652	-0.923252	-0.671371	-0.58191	-0.31284		0.172933	-0.399503	-7.04033	-9.71775	-12.9018	-9.20913	-0.183105	-0.129918	-0.141817	-1.12649	-1.16595	-0.908598	-0.2971		-0.344396		98.6751	87.5965	101.019	73.7211	89.2206	96.7542	93.0464
13	119.471	7.69491	88.0671	6.68594	0.00726824	-0.223796	-0.336591	-0.264486	-0.321161	-0.296456	-0.231934	-0.527122	-0.28031	-0.202433	-0.456492	-0.456492	-0.16276	-0.305176	0.0634766	-1.00122	-0.870095	-0.917562	-0.707029	-0.608795	-0.345453		0.239054	-0.39118	-7.25325	-8.88002	-12.8443	-8.14999	-0.115967	-0.175258	-0.102324	-1.16842	-1.17516	-0.892398	-0.332802		-0.319847		122.169	77.1268	105.682	103.88	109.692	101.839	92.4729
14	123.735	6.37678	94.449	7.02898	0.00659595	-0.16276	-0.283634	-0.211589	-0.417074	-0.25722	-0.189209	-0.451521	-0.252053	-0.254313	-0.473022	-0.473022	-0.152588	-0.259399	0.0695801	-0.926725	-0.83248	-1.00547	-0.695296	-0.569143	-0.34426		0.0864665	-0.449441	-6.28804	-7.86276	-13.1022	-6.57026	-0.170898	-0.13079	-0.147202	-1.13661	-1.21351	-0.937096	-0.30877		-0.392063		97.7353	100.16	91.6943	93.4079	113.665	97.4364	101.333
15	130.695	6.67493	93.1407	6.5178	0.000910593	-0.198364	-0.309664	-0.213623	-0.45631	-0.353132	-0.142415	-0.55001	-0.293873	-0.184123	-0.433604	-0.433604	-0.155979	-0.315348	-0.12207	-1.09036	-0.834193	-0.986582	-0.727817	-0.517968	-0.314966		0.150045	-0.335693	-5.30864	-6.98912	-12.9116	-8.81419	-0.183105	-0.212751	-0.139124	-1.1364	-1.1993	-0.920101	-0.298721		-0.394786		98.6751	109.583	125.885	108.906	104.193	97.6369	99.4288
16	133.583	5.18335	98.5697	4.82223	0.000131922	-0.208537	-0.283634	-0.223796	-0.369117	-0.239781	-0.12207	-0.613126	-0.204581	-0.131226	-0.401815	-0.401815	-0.166151	-0.335693	0.117188	-1.0134	-0.801151	-1.0309	-0.72794	-0.525027	-0.350807		0.231425	-0.277433	-6.81323	-8.67657	-12.4558	-8.36541	-0.158691	-0.269427	-0.248628	-1.12748	-1.25035	-0.935688	-0.324098		-0.35818		103.374	88.6435	85.4777	75.8154	96.5538	93.7696	103.895
17	137.721	6.57099	104.003	5.44454	0.00115244	-0.198364	-0.302483	-0.197347	-0.388009	-0.261579	-0.164795	-0.616594	-0.209102	-0.153605	-0.424703	-0.424703	-0.169542	-0.406901	0.0256348	-1.0359	-0.853742	-0.913952	-0.741325	-0.488178	-0.346401		0.0864665	-0.263561	-7.87779	-9.56217	-11.5716	-8.56287	-0.140381	-0.357492	-0.326718	-1.06412	-1.27862	-0.958206	-0.295478		-0.349046		91.157	93.1804	93.2484	77.4909	102.054	99.925	92.1091
18	138.498	6.13836	103.575	4.55761	0.000327433	-0.249227	-0.286327	-0.301107	-0.373477	-0.261579	-0.164795	-0.624917	-0.256574	-0.189209	-0.293732	-0.293732	-0.155979	-0.371297	-0.0158691	-1.06246	-0.829405	-0.887289	-0.66022	-0.553884	-0.411414		0.139872	-0.377308	-5.91899	-8.49705	-13.5345	-10.6991	-0.244141	-0.205776	-0.259399	-1.09306	-1.20114	-0.962887			-0.3533		139.085	89.6905	93.2484	95.0834	70.582	97.0765	89.4219
19	139.046	6.72082	103.22	3.84051	0.000322752	-0.223796	-0.344669	-0.244141	-0.41562	-0.283377	-0.24821	-0.617287	-0.340214	-0.169881	-0.396729	-0.396729	-0.132243	-0.366211	-0.0415039	-1.00342	-0.873002	-0.954519	-0.661413	-0.595508	-0.333873		0.147502	-0.363437	-7.25325	-8.11409	-13.3133	-9.69382	-0.219727	-0.162179	-0.209135	-1.11069	-1.19638	-0.993863			-0.391115		112.772	99.8112	101.019	126.08	95.3316	102.179	96.1975
20	139.801	7.99743	102.305	4.87876	0.00116906	-0.198364	-0.324922	-0.187174	-0.499907	-0.300816	-0.199382	-0.56943	-0.250922	-0.16276	-0.485738	-0.485738	-0.223796	-0.38147	0.0378418	-1.08855	-0.848021	-0.952424	-0.657054	-0.595508	-0.319356		0.1297	-0.396729	-6.1461	-6.82158	-12.628	-9.72972	-0.186157	-0.170898	-0.190286	-1.08315	-1.23738	-0.925776			-0.302315		86.4582	120.053	107.236	92.9891	116.72	99.2554	95.9863
21	142.061	7.10142	103.943	4.05542	0.000301479	-0.249227	-0.316844	-0.199382	-0.361851	-0.340053	-0.191243	-0.6159	-0.228317	-0.135295	-0.459035	-0.459035	-0.250922	-0.315348	-0.0488281	-1.07843	-0.820808	-1.07696	-0.715258	-0.623638	-0.388315		0.0508626	-0.368985	-5.83383	-8.37737	-13.1701	-9.87333	-0.15564	-0.201416	-0.224394	-1.11616	-1.25272	-0.899695			-0.304717		92.0968	86.8986	121.223	84.6117	110.304	96.0703	108.537
22	140.198	7.48646	102.89	4.25134	0.000598046	-0.213623	-0.274658	-0.22583	-0.453404	-0.348772	-0.223796	-0.651273	-0.218144	-0.221761	-0.433604	-0.433604	-0.186496	-0.401815	-0.0878906	-1.0562	-0.911275	-1.02735	-0.699273	-0.471154	-0.326026		0.144958	-0.302401	-6.99775	-8.58082	-13.4534	-9.90924	-0.15564	-0.1491	-0.254014	-1.0836	-1.29388	-0.939881	-0.274382		-0.37285		104.314	108.885	124.331	80.8419	104.193	106.659	103.537
23	143.713	7.33005	105.771	5.42641	0.000775697	-0.183105	-0.327615	-0.221761	-0.444685	-0.287737	-0.150553	-0.568737	-0.278049	-0.165812	-0.375112	-0.375112	-0.217014	-0.432332	-0.0976562	-1.03406	-0.806643	-1.02348	-0.715886	-0.490046	-0.408201		0.236511	-0.28853	-6.68548	-6.46255	-12.6372	-8.54492	-0.192261	-0.208391	-0.287224	-1.08962	-1.25489	-1.01901			-0.341077		102.434	106.791	102.573	103.042	90.1372	94.4123	103.147
24	141.567	6.74983	106.18	4.50783	0.00053171	-0.188192	-0.287224	-0.227865	-0.403995	-0.270299	-0.168864	-0.588157	-0.285961	-0.208537	-0.356038	-0.356038	-0.20006	-0.432332	-0.108643	-1.02095	-1.17627	-0.975583	-0.725798	-0.538209	-0.342026		0.244141	-0.230269	-5.37961	-7.75505	-13.1273	-8.83215	-0.213623	-0.258963	-0.274658	-1.10943	-1.29627	-0.946474	-0.300694		-0.350517		105.253	97.0193	96.3567	105.974	85.554	137.674	98.3204
25	142.975	5.71877	106.668	3.97814	8.91453e-05	-0.183105	-0.332103	-0.213623	-0.470843	-0.313895	-0.189209	-0.581915	-0.247531	-0.217692	-0.431061	-0.431061	-0.230577	-0.391642	-0.12085	-1.02785	-0.834071	-0.949165	-0.731734	-0.594366	-0.347564		0.183105	-0.271884	-5.20928	-8.78428	-12.7076	-7.27036	-0.143433	-0.238037	-0.312356	-1.09153	-1.23933	-0.923788	-0.36618		-0.338249		98.6751	113.073	111.898	91.7325	103.581	97.6225	95.6579
26	144.877	7.07205	104.039	5.26176	0.000285433	-0.172933	-0.318639	-0.209554	-0.412714	-0.340053	-0.215658	-0.622836	-0.24301	-0.147502	-0.436147	-0.436147	-0.189887	-0.396729	-0.192871	-0.93653	-0.84328	-0.948141	-0.732039	-0.596546	-0.33268		0.183105	-0.255238	-4.6557	-9.94514	-13.1126	-7.91662	-0.143433	-0.318255	-0.319537	-1.07226	-1.25589	-0.884505	-0.319433		-0.318377		96.7956	99.1132	121.223	90.057	104.804	98.7004	95.5546
27	147.432	6.50559	103.837	3.98815	3.2031e-05	-0.208537	-0.319537	-0.268555	-0.386556	-0.331334	-0.211589	-0.641563	-0.288222	-0.119019	-0.387828	-0.387828	-0.203451	-0.366211	-0.125732	-1.0428	-0.819462	-0.953724	-0.71275	-0.599349	-0.32627		0.114441	-0.344016	-7.43777	-6.666	-13.6297	-7.77301	-0.204468	-0.354004	-0.300688	-1.10781	-1.2036	-0.888865	-0.337177		-0.271598		124.049	92.8314	118.115	106.812	93.1927	95.9127	96.1173
28	146.904	6.79858	106.747	5.2733	0.000257619	-0.218709	-0.285429	-0.270589	-0.444685	-0.361851	-0.203451	-0.527815	-0.270137	-0.223796	-0.399272	-0.399272	-0.12207	-0.483195	-0.111084	-1.02479	-0.848603	-0.97335	-0.750931	-0.488801	-0.389401		0.0890096	-0.368985	-7.02614	-7.37209	-13.2188	-10.2862	-0.10376	-0.290353	-0.212725	-1.05488	-1.21619	-0.930121	-0.356207		-0.327838		124.988	106.791	128.994	100.11	95.9427	99.3235	98.0953
29	147.417	6.39526	111.751	4.98049	0.000447255	-0.254313	-0.306073	-0.223796	-0.46067	-0.274658	-0.158691	-0.640176	-0.203451	-0.189209	-0.396729	-0.396729	-0.220405	-0.508626	-0.0744629	-1.07318	-0.824464	-0.951659	-0.740651	-0.476033	-0.380406		0.17039	-0.335693	-7.75005	-10.1486	-13.5064	-9.99899	-0.170898	-0.396729	-0.182208	-1.16736	-1.22964	-0.972326	-0.345071		-0.357545		103.374	110.63	97.9108	75.3966	95.3316	96.4982	95.9092
30	147.215	6.73642	108.11	5.4229	0.000347428	-0.239054	-0.375187	-0.252279	-0.408354	-0.326974	-0.132243	-0.578447	-0.228317	-0.202433	-0.41453	-0.41453	-0.213623	-0.539144	-0.212402	-1.01288	-0.849291	-0.945112	-0.700558	-0.50956	-0.314247		0.114441	-0.352339	-5.97577	-7.49177	-13.8212	-8.14999	-0.0915527	-0.389753	-0.245038	-1.16291	-1.23889	-0.966726	-0.309291		-0.34709		116.531	98.0662	116.561	84.6117	99.6093	99.404	95.2494
31	142.815	5.94069	109.827	5.16217	0.000690532	-0.264486	-0.398524	-0.246175	-0.451951	-0.25722	-0.150553	-0.676242	-0.197799	-0.229899	-0.328064	-0.328064	-0.264486	-0.54423	-0.202637	-0.981519	-0.780959	-1.02736	-0.690386	-0.578588	-0.388927		0.0915527	-0.324596	-4.9254	-5.28971	-13.0514	-7.7012	-0.119019	-0.373186	-0.231575	-1.11908	-1.22239	-0.977771	-0.352322		-0.325415		113.711	108.536	91.6943	73.3022	78.8319	91.4062	103.539
32	148.413	7.6903	108.486	6.09189	0.000891488	-0.223796	-0.303381	-0.170898	-0.488281	-0.305176	-0.154622	-0.671387	-0.249792	-0.181071	-0.504812	-0.504812	-0.189887	-0.46285	-0.291748	-0.964646	-0.883725	-1.05985	-0.742365	-0.582117	-0.331471		0.282288	-0.191428	-6.30223	-6.90535	-14.1498	-9.92719	-0.158691	-0.300816	-0.236062	-1.15312	-1.26639	-0.857766	-0.356024		-0.296495		78.9401	117.261	108.79	92.5702	121.303	103.434	106.813
33	148.795	6.01895	109.255	4.98302	0.000115934	-0.152588	-0.326718	-0.148519	-0.421433	-0.340053	-0.183105	-0.604803	-0.324391	-0.221761	-0.48701	-0.48701	-0.244141	-0.554403	-0.2771	-0.961403	-0.828013	-1.06148	-0.702439	-0.637755	-0.320152		0.17039	-0.274658	-7.42358	-6.7378	-14.4496	-9.81948	-0.106812	-0.353132	-0.383265	-1.09138	-1.2565	-0.899481	-0.360459		-0.34647		68.6027	101.207	121.223	120.216	117.026	96.9136	106.977
34	146.923	5.38504	106.85	7.31566	0.00043672	-0.193278	-0.358133	-0.174967	-0.42434	-0.287737	-0.238037	-0.593706	-0.340214	-0.203451	-0.490824	-0.490824	-0.237359	-0.50354	-0.158691	-0.98132	-0.870952	-0.962902	-0.684803	-0.520148	-0.392767		0.165304	-0.316273	-6.67128	-7.57554	-13.5535	-9.22708	-0.140381	-0.338309	-0.311459	-1.13749	-1.33534	-0.971805	-0.38215		-0.348971		80.8196	101.905	102.573	126.08	117.942	101.939	97.0423
35	150.31	7.65452	106.781	6.57146	0.000533921	-0.183105	-0.341976	-0.229899	-0.437419	-0.322614	-0.236003	-0.541687	-0.328912	-0.184123	-0.423431	-0.423431	-0.210232	-0.610352	-0.211182	-1.01684	-0.877178	-0.966925	-0.732192	-0.49233	-0.315211		0.190735	-0.246915	-6.21707	-7.02503	-13.2402	-9.96309	-0.088501	-0.422886	-0.288122	-1.144	-1.22347	-1.03085	-0.364452		-0.311402		106.193	105.046	115.006	121.891	101.748	102.668	97.4478
36	144.944	6.82006	113.719	5.4604	0.00253474	-0.167847	-0.324025	-0.221761	-0.411261	-0.270299	-0.14445	-0.594399	-0.291612	-0.181071	-0.395457	-0.395457	-0.196669	-0.534058	-0.15625	-1.05877	-0.887978	-1.00945	-0.734838	-0.543711	-0.362784		0.21108	-0.244141	-6.35901	-7.97047	-13.1239	-10.5555	-0.128174	-0.484794	-0.255809	-1.16017	-1.16998	-1.01832	-0.325444		-0.388453		102.434	98.7642	96.3567	108.068	95.026	103.932	101.734
37	146.434	7.44964	114.975	4.22062	0.00205153	-0.178019	-0.357235	-0.229899	-0.446138	-0.279018	-0.148519	-0.63324	-0.245271	-0.161743	-0.315348	-0.315348	-0.166151	-0.635783	-0.19043	-1.02446	-0.813634	-1.0701	-0.722341	-0.583363	-0.36771		0.307719	-0.380083	-6.07513	-7.62341	-12.919	-9.87333	-0.119019	-0.547573	-0.227087	-1.14422	-1.20547	-0.979943	-0.296854		-0.369896		106.193	107.14	99.465	90.8947	75.7764	95.2305	107.846
38	147.4	7.37354	116.853	5.5042	0.00433433	-0.183105	-0.379675	-0.221761	-0.425793	-0.296456	-0.148519	-0.644337	-0.352648	-0.148519	-0.428518	-0.428518	-0.196669	-0.635783	-0.211182	-1.02935	-0.824908	-1.02505	-0.719541	-0.590733	-0.323808		0.109355	-0.28853	-5.6493	-6.77371	-12.4625	-8.52697	-0.0518799	-0.425502	-0.311459	-1.10899	-1.2865	-0.979989	-0.330354		-0.369547		102.434	102.254	105.682	130.687	102.97	96.5501	103.306
39	150.176	7.17501	118.609	8.14406	0.0102621	-0.213623	-0.327615	-0.201416	-0.440325	-0.235421	-0.187174	-0.602722	-0.325521	-0.177002	-0.375112	-0.375112	-0.237359	-0.534058	-0.17334	-0.974161	-0.824327	-1.10614	-0.68009	-0.601632	-0.328733		0.150045	-0.282981	-6.03254	-7.9226	-14.2997	-10.4119	-0.149536	-0.539725	-0.294405	-1.13824	-1.31352	-0.972646	-0.334791		-0.309222		93.0365	105.744	83.9236	120.634	90.1372	96.4821	111.478
40	151.492	8.04445	112.349	7.27211	0.00277061	-0.188192	-0.283634	-0.205485	-0.446138	-0.309535	-0.24821	-0.641563	-0.261095	-0.241089	-0.43869	-0.43869	-0.247531	-0.595093	-0.172119	-1.00099	-0.902494	-0.998835	-0.708757	-0.535511	-0.368796		0.157674	-0.319047	-5.35122	-6.72583	-14.6646	-10.4478	-0.0946045	-0.50572	-0.285429	-1.1096	-1.28246	-1.03949	-0.328611		-0.374701		94.916	107.14	110.344	96.7589	105.415	105.631	100.664
						-0.16276	-0.276453	-0.195312	-0.451951	-0.296456	-0.24821	-0.65266	-0.254313	-0.174967	-0.474294	-0.474294	-0.233968	-0.610352	-0.161133	-0.967323	-0.866225	-1.04491	-0.703204	-0.488073	-0.324236		0.185649	-0.313499	-5.408	-8.37737	-13.41	-9.13732	-0.10376	-0.500488	-0.271965	-1.0657	-1.28368	-1.02564	-0.36589		-0.339059		90.2172	108.536	105.682	94.2457	113.97	101.386	105.307
Panel D						-0.116984	-0.32582	-0.166829	-0.399635	-0.235421	-0.22583	-0.638788	-0.220405	-0.217692	-0.415802	-0.415802	-0.288222	-0.620524	-0.150146	-1.02299	-0.914258	-0.967736	-0.688504	-0.520564	-0.318194		0.200907	-0.332919	-6.18868	-8.67657	-13.4758	-8.22179	-0.106812	-0.523158	-0.306971	-1.19629	-1.308	-0.95686	-0.368139		-0.326713		77.0605	95.9723	83.9236	81.6796	99.9148	107.008	97.5295
Ctrl			KO			-0.208537	-0.290815	-0.244141	-0.41562	-0.239781	-0.203451	-0.597867	-0.331172	-0.177002	-0.396729	-0.396729	-0.244141	-0.691732	-0.178223	-1.07729	-0.831853	-0.974528	-0.675318	-0.583259	-0.387611		0.244141	-0.335693	-6.3874	-8.84411	-12.8905	-9.33479	-0.0671387	-0.543213	-0.23696	-1.13154	-1.27513	-0.965595	-0.357905		-0.403719		112.772	99.8112	85.4777	122.729	95.3316	97.3629	98.214
1 to 10	30 to 40		1 to 10	30 to 40		-0.264486	-0.350952	-0.215658	-0.46503	-0.2485	-0.170898	-0.638095	-0.342475	-0.112915	-0.330607	-0.330607	-0.261095	-0.686646	-0.167236	-1.05556	-0.873522	-1.04197	-0.71688	-0.60402	-0.358884		0.16276	-0.624223	-7.53713	-5.4812	-14.8666	-9.74767	-0.0457764	-0.479562	-0.259399	-1.10674	-1.23328	-0.962948	-0.327128		-0.36306		99.6148	111.677	88.586	126.918	79.443	102.24	105.011
99.8811	155.659		99.7441	98.1154		-0.147502	-0.274658	-0.286865	-0.444685	-0.292097	-0.191243	-0.640869	-0.292743	-0.161743	-0.485738	-0.485738	-0.237359	-0.717163	-0.275879	-0.947682	-0.803308	-1.00517	-0.749631	-0.58928	-0.369852		0.1297	-0.53267	-5.60672	-8.55689	-13.2589	-9.55021	0	-0.50136	-0.184003	-1.13632	-1.26735	-1.00624	-0.3628		-0.329146		132.507	106.791	104.127	108.487	116.72	94.022	101.302
99.6134	134.393		100.126	98.4205		-0.183105	-0.234267	-0.174967	-0.46503	-0.25722	-0.195312	-0.690113	-0.296134	-0.205485	-0.420888	-0.420888	-0.186496	-0.808716	-0.214844	-0.969725	-0.843341	-1.02089	-0.779965	-0.556998	-0.354723		0.231425	-0.454989	-6.72806	-5.64874	-13.2019	-8.68853	0.0244141	-0.543213	-0.312356	-1.04655	-1.24446	-1.00471	-0.338982		-0.390388		80.8196	111.677	91.6943	109.744	101.137	98.7075	102.887
99.9312	173.004		99.9786	98.0132		-0.208537	-0.356338	-0.217692	-0.412714	-0.2485	-0.284831	-0.632546	-0.298394	-0.189209	-0.417074	-0.417074	-0.227186	-0.742594	-0.206299	-1.00468	-0.835279	-1.06963	-0.743787	-0.538002	-0.370127		0.157674	-0.377308	-6.67128	-7.15667	-13.1148	-11.7582	-0.0213623	-0.641741	-0.271068	-1.05848	-1.352	-0.983477	-0.373829		-0.345987		100.555	99.1132	88.586	110.582	100.22	97.764	107.798
99.6351	170.169		99.7746	108.265		-0.259399	-0.356338	-0.154622	-0.447591	-0.287737	-0.229899	-0.631159	-0.252053	-0.18514	-0.429789	-0.429789	-0.247531	-0.813802	-0.217285	-1.0205	-0.870034	-1.1035	-0.682293	-0.512156	-0.326668		0.124613	-0.405051	-7.08292	-7.39602	-12.9749	-10.6812	-0.0396729	-0.611224	-0.212725	-1.10134	-1.20123	-1.06151	-0.383221		-0.295508		71.422	107.489	102.573	93.4079	103.276	101.832	111.212
99.594	119.248		99.892	110.614		-0.172933	-0.379675	-0.221761	-0.41998	-0.25286	-0.154622	-0.568737	-0.226056	-0.15564	-0.554403	-0.554403	-0.284831	-0.747681	-0.124512	-1.05641	-0.914839	-1.10919	-0.722892	-0.555959	-0.366899		0.228882	-0.274658	-6.20288	-8.24573	-13.5051	-8.81419	0.0579834	-0.530134	-0.302483	-1.04893	-1.27625	-1.01673	-0.367358		-0.389738		102.434	100.858	90.1401	83.7739	133.22	107.076	111.785
100.037	145.184		99.933	108.24		-0.152588	-0.294405	-0.233968	-0.463577	-0.270299	-0.111898	-0.594399	-0.256574	-0.151571	-0.577291	-0.577291	-0.291612	-0.768026	-0.3125	-0.991737	-0.832816	-1.07771	-0.735375	-0.585751	-0.361438		0.264486	-0.346791	-4.57054	-7.1447	-13.7493	-7.71915	-0.00915527	-0.522287	-0.303381	-1.16701	-1.35096	-1.03845	-0.348466		-0.37493		108.073	111.328	96.3567	95.0834	138.72	97.4757	108.612
100.094	119.973		98.7736	145.338		-0.289917	-0.307869	-0.274658	-0.348772	-0.292097	-0.174967	-0.691501	-0.352648	-0.152588	-0.390371	-0.390371	-0.196669	-0.773112	-0.285645	-1.0022	-0.800509	-1.05608	-0.697346	-0.626233	-0.37519		0.38147	-0.504927	-6.78484	-7.70718	-13.7367	-9.20913	0.0640869	-0.661795	-0.375187	-1.12294	-1.18683	-1.00307	-0.407375		-0.301763		126.868	83.7577	104.127	130.687	93.8038	93.6944	106.433
99.7521	118.567		98.371	101.038		-0.178019	-0.372494	-0.231934	-0.463577	-0.37493	-0.193278	-0.66237	-0.317609	-0.130208	-0.342051	-0.342051	-0.128852	-0.849406	-0.324707	-0.960317	-0.939314	-1.08667	-0.735191	-0.618967	-0.372177		0.216166	-0.552091	-5.408	-7.28832	-13.0013	-8.90395	0.00305176	-0.608608	-0.258502	-1.07017	-1.28851	-0.97257	-0.344367		-0.365148		107.133	111.328	133.656	117.702	82.1929	109.941	109.516
99.9763	149.185		99.9947	128.411		-0.178019	-0.337489	-0.205485	-0.430153	-0.25722	-0.219727	-0.641563	-0.365081	-0.177002	-0.376383	-0.376383	-0.149197	-0.849406	-0.299072	-0.994047	-0.842805	-1.01337	-0.761012	-0.559073	-0.341353		0.116984	-0.438343	-5.81963	-6.59419	-13.4262	-8.74239	0.0274658	-0.634766	-0.258502	-1.07732	-1.2457	-0.965273	-0.402373		-0.387757		94.916	103.301	91.6943	135.295	90.4428	98.6449	102.128
99.7254	162.662					-0.208537	-0.2962	-0.181071	-0.42434	-0.239781	-0.227865	-0.621449	-0.330042	-0.174967	-0.339508	-0.339508	-0.118679	-0.808716	-0.272217	-1.01138	-0.872742	-1.0305	-0.813481	-0.543608	-0.354386		0.34078	-0.338468	-7.40938	-6.92929	-12.5668	-11.5967	0.0518799	-0.635638	-0.227087	-1.06525	-1.2406	-1.00586	-0.395398	-0.55464	-0.304807		83.6389	101.905	85.4777	122.31	81.5818	102.149	103.855
						-0.310262	-0.297995	-0.156657	-0.459217	-0.283377	-0.164795	-0.691501	-0.342475	-0.193278	-0.428518	-0.428518	-0.105116	-0.84432	-0.247803	-1.05328	-0.877621	-0.940339	-0.755827	-0.512571	-0.354616		0.368754	-0.43002	-6.21707	-4.82297	-13.5884	-10.376	0	-0.561523	-0.395831	-1.09955	-1.36537	-1.02355	-0.363228	-0.605533	-0.373523		72.3617	110.281	101.019	126.918	102.97	102.72	94.7684
						-0.172933	-0.331205	-0.242106	-0.497001	-0.287737	-0.138346	-0.613126	-0.346996	-0.125122	-0.377655	-0.377655	-0.210232	-0.829061	-0.257568	-1.07387	-0.847211	-1.01067	-0.695893	-0.565301	-0.376169		0.249227	-0.488281	-6.18868	-10.2683	-13.8668	-10.3042	0.0610352	-0.660924	-0.337489	-1.09216	-1.16859	-0.98158	-0.393196	-0.552712	-0.337818		111.832	119.355	102.573	128.593	90.7483	99.1605	101.857
						-0.142415	-0.336591	-0.260417	-0.457764	-0.37493	-0.168864	-0.579834	-0.393338	-0.128174	-0.502268	-0.502268	-0.227186	-0.915527	-0.280762	-1.02909	-0.856802	-1.03962	-0.704489	-0.595196	-0.37389		0.289917	-0.443892	-6.85581	-7.38406	-13.4042	-8.90395	0.0183105	-0.58245	-0.356338	-1.04011	-1.29749	-1.01788	-0.374716	-0.5521	-0.300769		120.29	109.932	133.656	145.767	120.692	100.283	104.774
						-0.259399	-0.282736	-0.272624	-0.421433	-0.244141	-0.164795	-0.603416	-0.28031	-0.13326	-0.465393	-0.465393	-0.237359	-0.915527	-0.328369	-0.997474	-0.868948	-1.02749	-0.742212	-0.612531	-0.318836		0.287374	-0.421697	-5.91899	-9.62201	-13.4501	-8.79624	0.125122	-0.656564	-0.390445	-1.14084	-1.17504	-0.981075	-0.376078	-0.556414	-0.385669		125.928	101.207	87.0318	103.88	111.831	101.705	103.551
						-0.193278	-0.304278	-0.240072	-0.425793	-0.296456	-0.16276	-0.638788	-0.287091	-0.199382	-0.442505	-0.442505	-0.254313	-1.00199	-0.317383	-0.957304	-0.914656	-1.06607	-0.774076	-0.617306	-0.381523		0.305176	-0.51325	-5.79124	-9.14331	-14.0938	-9.19118	0.0610352	-0.639125	-0.377879	-1.15688	-1.29398	-1.03506	-0.406365	-0.567703	-0.349322		110.892	102.254	105.682	106.393	106.331	107.054	107.439
						-0.172933	-0.271068	-0.174967	-0.46503	-0.2485	-0.193278	-0.690807	-0.204581	-0.240072	-0.352224	-0.352224	-0.244141	-0.920614	-0.319824	-0.975645	-0.910082	-0.953816	-0.776355	-0.604435	-0.381875		0.233968	-0.51325	-7.26744	-6.91732	-13.0019	-8.95781	0.195312	-0.732422	-0.334796	-1.13128	-1.26129	-1.08401	-0.406778	-0.557653	-0.319892		80.8196	111.677	88.586	75.8154	84.6373	106.519	96.1266
						-0.203451	-0.282736	-0.231934	-0.512986	-0.292097	-0.20752	-0.592318	-0.328912	-0.216675	-0.517527	-0.517527	-0.183105	-0.864665	-0.323486	-0.968669	-0.835325	-0.936377	-0.791575	-0.573502	-0.40635		0.175476	-0.604803	-7.53713	-7.36012	-13.4516	-10.1965	0.115967	-0.702776	-0.44789	-1.17773	-1.30031	-0.997443	-0.367802	-0.607399	-0.354737		107.133	123.194	104.127	121.891	124.359	97.7694	94.3691
					Stim	-0.0813802	-0.150793	-0.221761	-0.316802	-0.671387	-0.142415	-0.400196	-0.48263	-0.0335693	-0.213623	-0.213623	-0.186496	-0.574748	-0.0317383	-0.767131	-0.783422	-0.632004	-0.516168	-0.594678	-0.253854		0.394185	-0.252464	-2.05816	-6.45058	-12.1734	-5.97786	0.65918	-0.395857	-0.187593	-0.695371	-0.698446	-0.735328	-0.449381	-0.161215	-0.20882		102.434	76.0799	239.338	178.857	51.3324	91.6945	63.6941
						-0.0915527	-0.199262	-0.18514	-0.312442	-0.540597	-0.124105	-0.537526	-0.440809	-0.0213623	-0.274658	-0.274658	-0.210232	-0.427246	-0.0817871	-0.851249	-0.731963	-0.719243	-0.570182	-0.55513	-0.19698		0.0686646	0.0610352	-3.57694	-10.2802	-12.7862	-6.64206	0.588989	-0.500488	-0.134636	-0.587191	-0.715459	-0.796118	-0.0217517	-0.124441	-0.251116		85.5184	75.0329	192.713	163.359	65.9988	85.6715	72.4861
						-0.0610352	-0.268375	-0.211589	-0.449044	-0.605992	-0.148519	-0.594399	-0.426116	-0.0783285	-0.390371	-0.390371	-0.220405	-0.427246	-0.10376	-0.868015	-0.834239	-0.810919	-0.627791	-0.550873	-0.260294		-0.0534058	0.0388406	-2.48399	-7.81489	-12.5867	-9.40659	0.561523	-0.55978	-0.0466739	-0.644319	-0.664107	-0.901852	-0.428852	-0.221271	-0.213747		97.7353	107.838	216.025	157.914	93.8038	97.6423	81.7252
						-0.0508626	-0.297995	-0.252279	-0.483922	-0.575474	-0.130208	-0.55972	-0.437419	-0.101725	-0.506083	-0.506083	-0.196669	-0.386556	-0.152588	-0.92752	-0.826132	-0.8209	-0.668129	-0.566652	-0.214021		-0.0457764	-0.0721325	-2.72529	-7.70718	-14.1149	-8.58082	0.509644	-0.496129	-0.124763	-0.546823	-0.777198	-0.936637	-0.483371	-0.268907	-0.240026		116.531	116.214	205.146	162.103	121.609	96.6933	82.7312
						-0.0356038	-0.23337	-0.274658	-0.440325	-0.558036	-0.254313	-0.568737	-0.345866	-0.0590007	-0.447591	-0.447591	-0.183105	-0.427246	-0.167236	-0.92466	-0.927964	-0.886968	-0.67954	-0.578173	-0.262115		0.101725	-0.424472	-6.1461	-7.8867	-13.3103	-9.56816	0.512695	-0.435965	-0.193876	-0.506837	-0.744294	-0.895901	-0.483203	-0.306415	-0.323777		126.868	105.744	198.93	128.174	107.554	108.612	89.3896
						-0.0101725	-0.27017	-0.213623	-0.46067	-0.483922	-0.20752	-0.53267	-0.411422	-0.0793457	-0.330607	-0.330607	-0.176324	-0.498454	-0.231934	-0.899114	-0.846369	-0.868856	-0.717752	-0.547551	-0.297481		0.0305176	-0.221946	-5.08153	-8.16196	-12.9339	-7.43193	0.57373	-0.419399	-0.134636	-0.577464	-0.858866	-0.987836	-0.447239	-0.277656	-0.289895		98.6751	110.63	172.51	152.469	79.443	99.0621	87.5643
						-0.0101725	-0.253116	-0.209554	-0.377837	-0.51008	-0.18514	-0.529896	-0.374123	-0.0793457	-0.375112	-0.375112	-0.183105	-0.467936	-0.3125	-0.959277	-0.900322	-0.901989	-0.766718	-0.55378	-0.284448		0.239054	-0.368985	-6.1319	-3.81769	-13.3017	-7.6653	0.622559	-0.50572	-0.175925	-0.561109	-0.750945	-0.981136	-0.505979	-0.322645	-0.301185		96.7956	90.7375	181.834	138.646	90.1372	105.377	90.9035
						-0.0254313	-0.215418	-0.236003	-0.440325	-0.449044	-0.20752	-0.543768	-0.400119	-0.107829	-0.44632	-0.44632	-0.223796	-0.50354	-0.339355	-0.919963	-0.846003	-0.904819	-0.735925	-0.597481	-0.313956		0.203451	-0.352339	-6.42998	-10.1606	-13.7315	-6.74977	0.494385	-0.513567	-0.109504	-0.664443	-0.730802	-0.926755	-0.406075	-0.367328	-0.34403		109.012	105.744	160.076	148.28	107.248	99.0191	91.1887
						-0.0712077	-0.222599	-0.297038	-0.361851	-0.361851	-0.242106	-0.551397	-0.406901	-0.163778	-0.437419	-0.437419	-0.220405	-0.610352	-0.334473	-0.919887	-0.875985	-0.998009	-0.739688	-0.616268	-0.346952		0.282288	-0.840621	-6.28804	-7.83883	-13.4574	-6.28303	0.497437	-0.592913	-0.179515	-0.62502	-0.816144	-0.901056	-0.412837	-0.382166	-0.272211		137.205	86.8986	128.994	150.793	105.109	102.528	100.58
						-0.157674	-0.14451	-0.319417	-0.396729	-0.414167	-0.191243	-0.551397	-0.422725	-0.101725	-0.382741	-0.382741	-0.247531	-0.518799	-0.333252	-0.951567	-0.945479	-0.996678	-0.747474	-0.583363	-0.295998		0.310262	-0.704679	-5.36542	-6.18729	-13.306	-5.83424	0.543213	-0.574602	-0.125661	-0.549531	-0.832633	-0.936851	-0.459951	-0.431177	-0.339149		147.543	95.2743	147.643	156.657	91.9705	110.662	100.446
						-0.178019	-0.259399	-0.227865	-0.390916	-0.414167	-0.170898	-0.629772	-0.408031	-0.132243	-0.345866	-0.345866	-0.227186	-0.488281	-0.366211	-0.868107	-0.920269	-0.966512	-0.757371	-0.601736	-0.348986		0.546773	-0.588157	-5.25186	-7.09683	-13.7193	-8.90395	0.524902	-0.542341	-0.0852697	-0.633741	-0.834485	-0.95507	-0.410343	-0.427675	-0.394665		105.253	93.8784	147.643	151.212	83.1096	107.712	97.4062
						-0.116984	-0.275556	-0.246175	-0.382196	-0.409807	-0.217692	-0.626998	-0.493933	-0.0895182	-0.404358	-0.404358	-0.193278	-0.508626	-0.380859	-0.997978	-0.906441	-1.07397	-0.77045	-0.538417	-0.336672		0.506083	-0.826749	-4.01696	-5.05036	-13.7658	-9.06552	0.509644	-0.608608	-0.152588	-0.603743	-0.844504	-0.95637	-0.406978	-0.446062	-0.323702		113.711	91.7844	146.089	183.046	97.1649	106.093	108.236
						-0.101725	-0.290815	-0.356038	-0.402541	-0.470843	-0.177002	-0.574979	-0.518799	-0.0712077	-0.398	-0.398	-0.16276	-0.50354	-0.487061	-0.979255	-0.925348	-1.02366	-0.790198	-0.587827	-0.407773		0.376383	-0.901656	-3.16531	-7.8508	-14.0112	-8.40131	0.650024	-0.740269	-0.052957	-0.662286	-0.88663	-0.93058	-0.415116	-0.47508	-0.383206		164.458	96.6703	167.847	192.261	95.6371	108.306	103.166
						-0.111898	-0.23696	-0.290934	-0.364758	-0.405448	-0.172933	-0.534058	-0.480369	-0.0864665	-0.396729	-0.396729	-0.128852	-0.554403	-0.490723	-1.01566	-0.885301	-1.03532	-0.7699	-0.686542	-0.435384		0.480652	-0.907204	-5.53575	-7.30028	-14.3205	-9.02961	0.427246	-0.728934	-0.0996309	-0.653688	-0.943415	-0.865582	-0.400032	-0.428822	-0.32491		134.386	87.5965	144.535	178.02	95.3316	103.619	104.341
						-0.111898	-0.29261	-0.321452	-0.408354	-0.388009	-0.166829	-0.55972	-0.396729	-0.126139	-0.442505	-0.442505	-0.166151	-0.513713	-0.509033	-1.01871	-0.855899	-0.991003	-0.793013	-0.672529	-0.433487		0.546773	-0.90443	-4.4144	-8.60476	-13.4476	-9.04756	0.534058	-0.694057	-0.157973	-0.706201	-0.954368	-0.973442	-0.453648	-0.434986	-0.308191		148.483	98.0662	138.318	147.023	106.331	100.177	99.8744
						-0.16276	-0.315947	-0.24821	-0.459217	-0.335693	-0.199382	-0.511169	-0.493933	-0.0996908	-0.415802	-0.415802	-0.176324	-0.493368	-0.53833	-1.00007	-0.899328	-1.06753	-0.81293	-0.641181	-0.408966		0.541687	-0.915527	-3.50597	-8.12605	-12.4163	-9.22708	0.43335	-0.65918	-0.0987333	-0.804074	-0.917609	-0.988188	-0.385669	-0.456509	-0.376245		114.651	110.281	119.669	183.046	99.9148	105.26	107.587
						-0.183105	-0.280941	-0.219727	-0.46067	-0.435965	-0.205485	-0.651273	-0.440809	-0.09257	-0.376383	-0.376383	-0.244141	-0.42216	-0.67749	-1.15736	-0.890058	-1.02336	-0.720812	-0.651665	-0.492717		0.0737508	-1.08199	-3.73308	-6.30697	-13.9411	-9.22708	0.445557	-0.734166	-0.192979	-0.725812	-1.03602	-0.992945	-0.396851	-0.480006	-0.344903		101.494	110.63	155.414	163.359	90.4428	104.175	103.135
						-0.178019	-0.324922	-0.325521	-0.473749	-0.405448	-0.252279	-0.609658	-0.408031	-0.0905355	-0.437419	-0.437419	-0.223796	-0.539144	-0.689697	-1.00864	-0.884964	-0.988173	-0.718257	-0.711143	-0.404821		0.104268	-0.846169	-4.64151	-8.44918	-13.7318	-12.0993	0.436401	-0.694057	-0.140919	-0.730097	-1.0256	-0.977603	-0.400691	-0.508183	-0.303645		150.362	113.771	144.535	151.212	105.109	103.579	99.5891
						-0.178019	-0.289917	-0.284831	-0.38365	-0.453404	-0.166829	-0.626304	-0.36395	-0.110881	-0.366211	-0.366211	-0.230577	-0.539144	-0.638428	-1.0424	-0.886723	-1.07687	-0.783758	-0.742075	-0.457152		0.167847	-1.10141	-4.58473	-6.90535	-14.88	-11.5608	0.476074	-0.742885	-0.0942455	-0.768462	-1.08692	-0.955392	-0.385485	-0.468074	-0.390274		131.567	92.1334	161.631	134.876	87.9984	103.785	108.528
						-0.111898	-0.254014	-0.282796	-0.441778	-0.370571	-0.303141	-0.497298	-0.379774	-0.160726	-0.478109	-0.478109	-0.20006	-0.488281	-0.65918	-0.988372	-0.911764	-1.0478	-0.811431	-0.753078	-0.466223		0.295003	-0.943271	-6.55773	-4.94265	-14.4165	-11.1838	0.457764	-0.702776	-0.252219	-0.682387	-0.978934	-0.888299	-0.415895	-0.458911	-0.429066		130.627	106.093	132.102	140.74	114.887	106.716	105.598
						-0.127157	-0.26658	-0.274658	-0.459217	-0.422886	-0.233968	-0.55001	-0.392207	-0.17395	-0.415802	-0.415802	-0.152588	-0.508626	-0.72876	-0.998315	-0.941043	-1.09796	-0.808417	-0.737301	-0.527075		-0.0152588	-1.01818	-3.63372	-3.72195	-14.4223	-11.9737	0.439453	-0.783866	-0.206442	-0.758733	-1.00475	-0.970627	-0.418619	-0.498867	-0.317933		126.868	110.281	150.752	145.348	99.9148	110.143	110.654
						-0.137329	-0.305176	-0.374349	-0.427246	-0.38365	-0.101725	-0.664451	-0.461155	-0.178019	-0.370026	-0.370026	-0.118679	-0.559489	-0.783691	-0.988318	-0.987882	-1.06992	-0.809901	-0.710832	-0.49544		-0.0839233	-0.929399	-4.55635	-8.59279	-13.1805	-10.8786	0.369263	-0.803048	-0.26658	-0.719681	-1.07817	-1.0085	-0.451032	-0.483111	-0.312098		172.916	102.603	136.764	170.899	88.915	115.625	107.828
						-0.193278	-0.307869	-0.327555	-0.377837	-0.37929	-0.211589	-0.722018	-0.517669	-0.0834147	-0.441233	-0.441233	-0.15937	-0.467936	-0.770264	-0.936867	-1.01829	-1.06651	-0.783147	-0.786918	-0.45524		-0.106812	-1.00153	-5.32283	-6.30697	-13.2494	-9.83743	0.305176	-0.751604	-0.257604	-0.75052	-1.11673	-1.05074	-0.419826	-0.501681	-0.426757		151.302	90.7375	135.21	191.842	106.026	119.185	107.484
						-0.167847	-0.29261	-0.26652	-0.392369	-0.440325	-0.22583	-0.586076	-0.496193	-0.0590007	-0.387828	-0.387828	-0.186496	-0.50354	-0.753174	-0.999263	-1.00775	-1.01364	-0.773219	-0.790135	-0.482514		-0.101725	-1.02927	-5.46478	-5.97187	-12.9921	-10.1965	0.430298	-0.832694	-0.190286	-0.845758	-1.11667	-0.982345	-0.394098	-0.529705	-0.440394		123.109	94.2274	156.968	183.884	93.1927	117.951	102.156
						-0.152588	-0.314152	-0.250244	-0.41998	-0.544957	-0.209554	-0.522267	-0.475848	-0.110881	-0.537872	-0.537872	-0.189887	-0.559489	-0.769043	-0.970474	-1.00951	-1.06935	-0.773372	-0.818161	-0.547236		-0.249227	-1.23457	-4.24407	-5.91203	-13.2867	-9.87333	0.436401	-0.860596	-0.200159	-0.842164	-1.20525	-0.971805	-0.388346	-0.536299	-0.373552		115.591	100.858	194.268	176.344	129.248	118.157	107.771
						-0.198364	-0.295302	-0.333659	-0.427246	-0.418527	-0.191243	-0.568043	-0.429507	-0.184123	-0.44632	-0.44632	-0.183105	-0.493368	-0.843506	-0.923635	-1.09323	-1.12707	-0.740376	-0.813802	-0.550112		-0.488281	-1.17077	-3.97438	-4.96659	-13.9751	-9.4784	0.384521	-0.877162	-0.132841	-0.850483	-1.16253	-0.994996	-0.461251	-0.542158	-0.364359		154.121	102.603	149.197	159.171	107.248	127.956	113.587
						-0.106812	-0.211828	-0.311279	-0.449044	-0.357492	-0.174967	-0.624223	-0.418204	-0.203451	-0.523885	-0.523885	-0.213623	-0.508626	-0.916748	-0.987423	-1.09056	-1.20859	-0.683724	-0.823975	-0.515663		-0.457764	-1.19851	-4.40021	-4.34427	-13.3081	-10.3939	0.384521	-0.83095	-0.129251	-0.890974	-1.22922	-1.01155	-0.387397	-0.523128	-0.331809		143.784	107.838	127.439	154.982	125.887	127.642	121.803
						-0.203451	-0.297098	-0.303141	-0.560942	-0.322614	-0.156657	-0.665145	-0.415943	-0.201416	-0.413259	-0.413259	-0.203451	-0.681559	-0.856934	-0.942649	-0.991493	-1.19032	-0.790749	-0.825117	-0.548934		-0.493368	-1.23457	-4.1731	-2.94405	-14.672	-7.7371	0.375366	-0.743757	-0.225292	-0.875051	-1.19326	-0.986092	-0.41926	-0.533943	-0.428141		140.025	134.71	115.006	154.144	99.3037	116.048	119.962
						-0.111898	-0.254014	-0.309245	-0.470843	-0.440325	-0.181071	-0.62561	-0.411422	-0.222778	-0.498454	-0.498454	-0.186496	-0.549316	-0.871582	-1.00719	-0.933318	-1.13411	-0.790918	-0.820549	-0.55412		-0.455221	-1.05702	-5.01056	-5.85219	-13.4534	-6.58821	0.372314	-0.732422	-0.256707	-0.973548	-1.15496	-0.975614	-0.425104	-0.532581	-0.427324		142.844	113.073	156.968	152.469	119.776	109.239	114.296
						-0.157674	-0.323127	-0.311279	-0.537691	-0.427246	-0.280762	-0.649886	-0.405771	-0.191243	-0.490824	-0.490824	-0.196669	-0.661214	-0.942383	-0.931865	-1.22272	-1.11018	-0.807424	-0.84733	-0.521323		-0.572205	-1.07644	-4.6699	-9.11937	-12.9492	-7.77301	0.354004	-0.869315	-0.291712	-0.888285	-1.21994	-0.937876	-0.409011	-0.538333	-0.449289		143.784	129.126	152.306	150.374	117.942	143.112	111.885
						-0.16276	-0.258502	-0.315348	-0.478109	-0.453404	-0.260417	-0.618675	-0.388817	-0.119019	-0.48701	-0.48701	-0.217014	-0.595093	-0.957031	-0.960745	-1.00711	-1.11578	-0.779032	-0.773527	-0.557286		-0.732422	-1.30948	-4.71248	-8.22179	-12.8679	-11.5967	0.363159	-0.911168	-0.317742	-0.913476	-1.18488	-0.960592	-0.420102	-0.547083	-0.332221		145.663	114.818	161.631	144.091	117.026	117.876	112.45
						-0.16276	-0.394036	-0.319417	-0.521705	-0.353132	-0.211589	-0.546542	-0.428376	-0.13326	-0.424703	-0.424703	-0.115289	-0.630697	-0.975342	-0.887427	-0.991446	-1.17581	-0.828303	-0.737716	-0.552055		-0.699361	-1.2207	-4.88281	-10.5555	-12.718	-8.63468	0.479126	-0.74986	-0.302483	-0.988447	-1.10536	-0.993359	-0.401256	-0.575627	-0.346155		147.543	125.287	125.885	158.752	102.054	116.042	118.499
						-0.132243	-0.280941	-0.262451	-0.491188	-0.449044	-0.191243	-0.586076	-0.434028	-0.189209	-0.663757	-0.663757	-0.125461	-0.706991	-0.964355	-1.01216	-1.12152	-1.14462	-0.812379	-0.817643	-0.565026		-0.709534	-1.43155	-4.28665	-5.61284	-14.6319	-8.59878	0.415039	-0.828334	-0.439812	-0.939038	-1.16553	-1.00546	-0.393593	-0.550647	-0.361485		121.229	117.959	160.076	160.846	159.497	131.266	115.356
						-0.198364	-0.333898	-0.264486	-0.454857	-0.431606	-0.177002	-0.644337	-0.393338	-0.161743	-0.433604	-0.433604	-0.149197	-0.727336	-0.982666	-0.918189	-1.1111	-1.17974	-0.806077	-0.859371	-0.528161		-0.747681	-1.254	-5.06734	-9.87333	-14.6111	-9.53226	0.463867	-0.927734	-0.214521	-0.939483	-1.19269	-1.03377	-0.409839	-0.52813	-0.378724		122.169	109.234	153.86	145.767	104.193	130.047	118.895
						-0.116984	-0.244141	-0.2889	-0.405448	-0.453404	-0.284831	-0.645724	-0.414813	-0.210571	-0.555674	-0.555674	-0.115289	-0.701904	-0.960693	-0.863762	-1.28885	-1.19814	-0.814781	-0.787852	-0.51346		-0.859578	-1.09586	-4.55635	-10.005	-14.3202	-5.34955	0.500488	-0.837054	-0.236062	-1.01511	-1.28128	-1.00948	-0.39679	-0.52169	-0.397798		133.446	97.3683	161.631	153.725	133.525	150.852	120.75
						-0.183105	-0.267478	-0.331624	-0.431606	-0.492641	-0.268555	-0.633933	-0.475848	-0.151571	-0.603994	-0.603994	-0.20006	-0.712077	-0.998535	-0.87577	-1.12871	-1.2109	-0.823362	-0.748718	-0.559672		-0.915527	-1.47317	-5.53575	-8.16196	-14.3244	-8.38336	0.585938	-0.925991	-0.201955	-0.966466	-1.23014	-0.97049	-0.369423	-0.544207	-0.444027		153.181	103.65	175.618	176.344	145.136	132.108	122.036
						-0.208537	-0.279146	-0.360107	-0.504267	-0.440325	-0.215658	-0.59648	-0.422725	-0.168864	-0.565847	-0.565847	-0.206841	-0.895182	-0.98877	-0.963422	-1.04083	-1.22647	-0.8075	-0.740518	-0.505659		-0.681559	-1.46207	-5.9048	-5.62481	-12.8452	-11.7762	0.457764	-0.844029	-0.328513	-1.07278	-1.19314	-0.992961	-0.436562	-0.553217	-0.448509		166.338	121.1	156.968	156.657	135.97	121.822	123.605
						-0.228882	-0.32941	-0.319417	-0.514439	-0.37493	-0.199382	-0.574285	-0.48263	-0.195312	-0.539144	-0.539144	-0.20006	-0.793457	-0.98999	-0.866791	-1.00416	-1.16153	-0.775039	-0.852935	-0.505093		-0.734965	-1.27896	-5.74866	-7.1088	-13.2329	-10.3042	0.476074	-0.78125	-0.400319	-1.02313	-1.26667	-1.01069	-0.489367	-0.533897	-0.474347		147.543	123.543	133.656	178.857	129.553	117.53	117.061
						-0.157674	-0.288122	-0.303141	-0.531878	-0.470843	-0.199382	-0.570817	-0.577573	-0.152588	-0.461578	-0.461578	-0.233968	-0.788371	-0.955811	-0.858577	-1.07622	-1.18119	-0.827784	-0.836327	-0.53558		-0.740051	-1.254	-5.26606	-6.37877	-14.2489	-13.4457	0.408936	-0.833566	-0.320435	-1.01153	-1.22604	-1.06842	-0.42714	-0.534279	-0.456257		140.025	127.73	167.847	214.042	110.915	125.965	119.042
						-0.132243	-0.365313	-0.295003	-0.527518	-0.344413	-0.250244	-0.622836	-0.544795	-0.107829	-0.493368	-0.493368	-0.210232	-0.823975	-0.9729	-0.822216	-1.07284	-1.13489	-0.836564	-0.796156	-0.55955		-0.750224	-1.38439	-4.74087	-7.20454	-13.6801	-11.2915	0.473022	-0.831822	-0.326718	-1.0861	-1.27778	-1.03445	-0.417181	-0.537997	-0.409708		136.266	126.683	122.777	201.895	118.553	125.569	114.375
						-0.172933	-0.342874	-0.278727	-0.467936	-0.440325	-0.231934	-0.63532	-0.428376	-0.171916	-0.488281	-0.488281	-0.223796	-0.879924	-0.961914	-0.806184	-1.13915	-1.12193	-0.909424	-0.751418	-0.552452		-0.897725	-1.26509	-5.19509	-7.49177	-16.2815	-8.68853	0.43335	-0.978306	-0.264785	-1.03514	-1.23782	-1.01022	-0.385317	-0.54849	-0.456324		128.747	112.375	156.968	158.752	117.331	133.331	113.069
						-0.188192	-0.271965	-0.32959	-0.527518	-0.431606	-0.181071	-0.636014	-0.417074	-0.164795	-0.576019	-0.576019	-0.189887	-0.930786	-1.07666	-0.861192	-1.19372	-1.15883	-0.881201	-0.750172	-0.575612		-0.923157	-1.17631	-5.3938	-7.97047	-13.5342	-10.735	0.335693	-0.914655	-0.339284	-1.03027	-1.23208	-0.981504	-0.414979	-0.543152	-0.477726		152.242	126.683	153.86	154.563	138.414	139.717	116.788
						-0.157674	-0.305176	-0.297038	-0.607445	-0.396729	-0.154622	-0.590238	-0.415943	-0.128174	-0.497182	-0.497182	-0.186496	-0.961304	-1.06567	-0.80776	-1.10942	-1.18459	-0.87476	-0.740933	-0.601143		-0.712077	-1.34832	-5.47897	-7.91063	-13.3418	-11.83	0.408936	-0.908552	-0.38147	-1.10605	-1.25336	-1.02077	-0.394403	-0.5402	-0.451935		137.205	145.878	141.427	154.144	119.47	129.85	119.384
						-0.218709	-0.333898	-0.386556	-0.431606	-0.405448	-0.193278	-0.643643	-0.435158	-0.0762939	-0.582377	-0.582377	-0.135634	-0.971476	-1.01562	-0.762205	-1.05987	-1.20377	-0.764714	-0.809027	-0.524474		-0.783284	-1.33168	-4.48537	-7.21651	-13.7377	-12.4224	0.338745	-0.943429	-0.359928	-1.05993	-1.23958	-1.06695	-0.422871	-0.553095	-0.406594		178.555	103.65	144.535	161.265	139.942	124.051	121.317
						-0.16276	-0.259399	-0.337728	-0.417074	-0.462123	-0.221761	-0.539606	-0.471327	-0.147502	-0.382741	-0.382741	-0.145806	-0.900269	-1.04248	-0.740667	-1.11332	-1.24028	-0.796302	-0.845773	-0.581119		-0.915527	-1.26509	-5.62091	-4.42804	-12.9679	-9.26298	0.393677	-0.946045	-0.288122	-1.13111	-1.30188	-1.03729	-0.405049	-0.564874	-0.50497		156.001	100.16	164.739	174.669	91.9705	130.307	124.997
						-0.16276	-0.363518	-0.372314	-0.476656	-0.37929	-0.132243	-0.628385	-0.514278		-0.336965	-0.336965	-0.172933	-0.961304	-1.07056	-0.725447	-1.25423	-1.21123	-0.8317	-0.861135	-0.551764		-1.04777	-1.55362	-4.82604	-7.98244	-13.1784	-8.2577	0.405884	-0.884138	-0.340181	-1.07536	-1.29344	-1.06998	-0.370174	-0.562655	-0.400597		171.977	114.469	135.21	190.586	80.9707	146.8	122.07
						-0.218709	-0.241448	-0.286865	-0.55077	-0.366211	-0.268555	-0.50354	-0.479239		-0.602722	-0.602722	-0.247531	-0.981649	-1.09863	-0.755062	-1.03312	-1.22265	-0.858975	-0.863212	-0.586213		-0.96639	-1.16799	-5.29445	-11.5847	-13.7594	-8.18589	0.393677	-0.870187	-0.213623	-1.04213	-1.26254	-1.01052	-0.429617	-0.545676	-0.378234		132.507	132.267	130.548	177.601	144.831	120.919	123.22
						-0.183105	-0.32941	-0.240072	-0.585647	-0.418527	-0.24821	-0.563188	-0.551577		-0.545502	-0.545502	-0.183105	-0.976562	-1.07056	-0.678653	-1.07061	-1.13216	-0.890042	-0.790343	-0.64477		-0.773112	-1.29284	-5.20928	-10.747	-13.8206	-8.45516	0.283813	-0.834438	-0.220804	-1.13193	-1.35763	-1.02386	-0.419383	-0.55441	-0.339639		110.892	140.643	149.197	204.408	131.081	125.308	114.101
						-0.198364	-0.304278	-0.335693	-0.555129	-0.549316	-0.203451	-0.549316	-0.455503		-0.483195	-0.483195	-0.152588	-1.0732	-1.12183	-0.775345	-1.17285	-1.17729	-0.860061	-0.788371	-0.596125		-0.857035	-1.27064	-4.85442	-4.72723	-14.4269	-9.11937	0.299072	-0.882394	-0.258502	-1.05921	-1.24377	-1.09222	-0.436776	-0.568239	-0.394433		155.061	133.314	195.822	168.805	116.109	137.275	118.649
						-0.249227	-0.289917	-0.299072	-0.623431	-0.392369	-0.256348	-0.640176	-0.457764		-0.343323	-0.343323	-0.16276	-1.09863	-1.03516	-0.831348	-1.11658	-1.20383	-0.827769	-0.785672	-0.541484		-0.971476	-1.27342	-5.43639	-6.47451	-13.2772	-11.5787	0.350952	-0.858852	-0.251321	-1.11925	-1.24034	-1.07127	-0.394326	-0.534754	-0.370279		138.145	149.717	139.873	169.642	82.4985	130.688	121.323
						-0.193278	-0.235165	-0.272624	-0.454857	-0.435965	-0.254313	-0.602722	-0.420464		-0.470479	-0.470479	-0.152588	-1.19019	-1.09253	-0.775804	-1.14463	-1.25745	-0.869391	-0.75256	-0.57731		-0.951131	-1.34555	-8.00554	-5.15807	-13.7728	-12.207	0.280762	-0.90332	-0.412885	-1.11254	-1.28113	-1.03879	-0.414106	-0.552727	-0.408032		125.928	109.234	155.414	155.82	113.053	133.972	126.727
						-0.188192	-0.29979	-0.366211	-0.518799	-0.431606	-0.231934	-0.654741	-0.410292		-0.513713	-0.513713	-0.176324	-1.10372	-1.01929	-0.77302	-1.05374	-1.15433	-0.882363	-0.779236	-0.633725		-0.991821	-1.37884	-5.98996	-9.59808	-14.0115	-12.0634	0.27771	-0.815255	-0.356338	-1.07942	-1.31238	-0.983033	-0.445388	-0.555512	-0.367604		169.157	124.59	153.86	152.05	123.442	123.333	116.335
						-0.116984	-0.201955	-0.337728	-0.511533	-0.37493	-0.236003	-0.676935	-0.515408		-0.448863	-0.448863	-0.210232	-1.21562	-1.05225	-0.810299	-1.01473	-1.16666	-0.851877	-0.83477	-0.565822		-0.793457	-1.20961	-4.72668	-7.46783	-12.7718	-7.34217	0.228882	-0.839669	-0.395831	-1.16068	-1.30271	-1.00717	-0.444531	-0.580966	-0.327731		156.001	122.845	133.656	191.005	107.859	118.767	117.577
						-0.233968	-0.306073	-0.258382	-0.571115	-0.37929	-0.215658	-0.528509	-0.498454		-0.498454	-0.498454	-0.12207	-1.10881	-1.07666	-0.956064	-1.05254	-1.18186	-0.845115	-0.864769	-0.600317		-0.874837	-1.35942	-6.00416	-8.61673	-13.0753	-9.19118	0.311279	-0.902448	-0.348259	-1.08419	-1.28697	-1.03689	-0.426863	-0.564659	-0.318868		119.35	137.153	135.21	184.722	119.776	123.193	119.11
						-0.16276	-0.340181	-0.274658	-0.556583	-0.392369	-0.174967	-0.634627	-0.499584		-0.448863	-0.448863	-0.101725	-1.16475	-1.14746	-0.833336	-1.06438	-1.19159	-0.836809	-0.845047	-0.571604		-0.930786	-1.33722	-5.12411	-5.94794	-12.796	-11.0043	0.305176	-0.929478	-0.41109	-1.04124	-1.25813	-1.08003	-0.445954	-0.594947	-0.344139		126.868	133.663	139.873	185.14	107.859	124.579	120.09
						-0.213623	-0.350952	-0.3479	-0.537691	-0.418527	-0.12207	-0.595093	-0.454373		-0.415802	-0.415802	-0.16276	-1.23596	-1.14868	-0.895519	-1.0674	-1.18791	-0.87216	-0.891341	-0.606145		-0.897725	-1.14857	-5.05314	-5.68465	-12.9226	-9.13732	0.280762	-0.905936	-0.366211	-1.06193	-1.30068	-1.09609	-0.418205	-0.577218	-0.386616		160.699	129.126	149.197	168.386	99.9148	124.932	119.719
						-0.208537	-0.343772	-0.337728	-0.549316	-0.344413	-0.199382	-0.649886	-0.496193		-0.378927	-0.378927	-0.189887	-1.31226	-1.00708	-0.940416	-1.11482	-1.25162	-0.883006	-0.931305	-0.634184		-0.831604	-1.20961	-7.22486	-4.32033	-13.1579	-11.7044	0.283813	-0.849261	-0.349157	-1.0614	-1.23952	-1.05788	-0.445082	-0.579375	-0.41181		156.001	131.918	122.777	183.884	91.0539	130.482	126.139
						-0.178019	-0.343772	-0.362142	-0.466483	-0.418527	-0.270589	-0.661677	-0.505235		-0.522614	-0.522614	-0.169542	-1.28174	-1.04614	-0.973434	-1.05762	-1.20587	-0.81703	-0.843904	-0.600959		-0.818888	-1.254	-5.83383	-5.553	-13.548	-10.4298	0.283813	-0.780378	-0.334796	-1.10218	-1.19731	-1.05146	-0.469068	-0.563359	-0.420547		167.278	112.026	149.197	187.235	125.581	123.788	121.528
						-0.188192	-0.225292	-0.297038	-0.481015	-0.462123	-0.246175	-0.631853	-0.592267		-0.423431	-0.423431	-0.118679	-1.20036	-1.05347	-0.843325	-1.10611	-1.19461	-0.780209	-0.800619	-0.560529		-0.859578	-1.45652	-6.1461	-7.43193	-14.3471	-10.735	0.198364	-0.840541	-0.372494	-1.13411	-1.24873	-1.07255	-0.420806	-0.577494	-0.356726		137.205	115.516	164.739	219.488	101.748	129.463	120.394
						-0.147502	-0.26299	-0.321452	-0.492641	-0.479562	-0.246175	-0.554172	-0.466806		-0.345866	-0.345866	-0.183105	-1.23088	-1.09619	-0.873598	-1.13703	-1.19895	-0.817901	-0.844839	-0.64093		-0.979106	-1.52033	-7.83521	-4.78707	-13.4314	-9.49635	0.289917	-0.908552	-0.333001	-1.15343	-1.21163	-1.08569	-0.405555	-0.564124	-0.313528		148.483	118.308	170.955	172.993	83.1096	133.082	120.832
						-0.142415	-0.259399	-0.354004	-0.469389	-0.405448	-0.258382	-0.609658	-0.445331		-0.542959	-0.542959	-0.237359	-1.21562	-1.10229	-0.973212	-1.00249	-1.19497	-0.810421	-0.85906	-0.631232		-0.854492	-1.46484	-7.73585	-8.64066	-12.6711	-9.06552	0.222778	-0.906808	-0.327615	-1.18914	-1.28774	-1.09261	-0.456678	-0.563726	-0.332694		163.519	112.724	144.535	165.035	130.47	117.335	120.431
						-0.228882	-0.280941	-0.368245	-0.584194	-0.444685	-0.240072	-0.640869	-0.415943		-0.48701	-0.48701	-0.125461	-1.26648	-1.13892	-0.969097	-1.05158	-1.23092	-0.878233	-0.893106	-0.638697		-0.719706	-1.28451	-8.03393	-7.01306	-12.3992	-7.57554	0.296021	-0.821359	-0.365313	-1.12574	-1.26995	-1.09599	-0.44929	-0.585433	-0.313282		170.097	140.294	158.522	154.144	117.026	123.08	124.054
						-0.254313	-0.276453	-0.378418	-0.563849	-0.497001	-0.256348	-0.666532	-0.40125		-0.612895	-0.612895	-0.145806	-1.28174	-1.10962	-1.02248	-1.07312	-1.19505	-0.881338	-0.902552	-0.540857		-0.740051	-1.43433	-7.46616	-7.41996	-12.8443	-9.5143	0.341797	-0.822231	-0.430836	-1.17628	-1.32849	-1.12811	-0.439789	-0.587207	-0.395687		174.796	135.408	177.172	148.699	147.275	125.601	120.438
						-0.244141	-0.258502	-0.354004	-0.537691	-0.488281	-0.231934	-0.685258	-0.457764		-0.398	-0.398	-0.24075	-1.41398	-1.08276	-0.917791	-1.08633	-1.18538	-0.863135	-0.861862	-0.620233		-0.750224	-1.3178	-5.56414	-7.28832	-13.1108	-9.58611	0.250244	-0.881522	-0.343772	-1.22347	-1.3419	-1.1366	-0.447958	-0.590634	-0.403246		163.519	129.126	174.064	169.642	95.6371	127.148	119.464
						-0.157674	-0.304278	-0.286865	-0.55077	-0.418527	-0.244141	-0.647805	-0.452112		-0.514984	-0.514984	-0.193278	-1.15967	-1.05713	-1.0897	-1.0573	-1.15978	-0.85024	-0.823767	-0.599108		-0.770569	-1.47872	-6.28804	-4.61952	-13.596	-9.42455	0.302124	-0.810024	-0.235165	-1.18887	-1.26759	-1.0768	-0.414182	-0.594198	-0.394848		132.507	132.267	149.197	167.548	123.748	123.75	116.883
						-0.142415	-0.324922	-0.301107	-0.533331	-0.457764	-0.238037	-0.602722	-0.518799		-0.411987	-0.411987	-0.142415	-1.32751	-1.03149	-0.988433	-1.1141	-1.22355	-0.78128	-0.761279	-0.581868		-0.933329	-1.24012	-4.81184	-8.53295	-13.3757	-11.1299	0.305176	-0.848389	-0.287224	-1.26842	-1.22904	-1.04915	-0.428853	-0.577723	-0.395414		139.085	128.079	163.185	192.261	98.9982	130.398	123.311
						-0.223796	-0.32582	-0.26652	-0.463577	-0.444685	-0.250244	-0.660983	-0.504105		-0.436147	-0.436147	-0.139025	-1.30208	-1.04492	-0.959491	-1.04199	-1.19586	-0.804043	-0.791069	-0.556705		-0.745138	-1.10696	-5.25186	-12.2669	-13.1343	-10.6093	0.195312	-0.814383	-0.235165	-1.2665	-1.25211	-1.10198	-0.405708	-0.553814	-0.384323		123.109	111.328	158.522	186.816	104.804	121.958	120.52
						-0.142415	-0.303381	-0.404867	-0.515892	-0.370571	-0.118001	-0.622836	-0.475848		-0.470479	-0.470479	-0.132243	-1.2207	-1.07422	-0.817795	-1.03171	-1.16932	-0.825474	-0.891446	-0.557194		-0.640869	-1.20961	-6.24546	-7.73112	-14.344	-8.83215	0.241089	-0.846645	-0.428144	-1.2228	-1.32455	-1.10679	-0.422841	-0.576591	-0.309214		187.013	123.892	132.102	176.344	113.053	120.755	117.845
						-0.152588	-0.353645	-0.386556	-0.483922	-0.418527	-0.179036	-0.704679	-0.458894		-0.492096	-0.492096	-0.230577	-1.38855	-1.11206	-0.894234	-1.06376	-1.12577	-0.920575	-0.908262	-0.565378		-0.757853	-1.05147	-5.87641	-5.79236	-13.5605	-8.41926	0.375366	-0.847517	-0.376982	-1.35712	-1.33643	-1.15135	-0.41972	-0.586488	-0.31114		178.555	116.214	149.197	170.061	118.248	124.506	113.456
						-0.167847	-0.303381	-0.356038	-0.544957	-0.457764	-0.240072	-0.497298	-0.411422		-0.405629	-0.405629	-0.220405	-1.3326	-1.17432	-0.935001	-1.20333	-1.09322	-0.886616	-0.884595	-0.56108		-0.745138	-1.13192	-4.13052	-7.28832	-13.1123	-8.2577	0.302124	-0.871059	-0.341079	-1.31196	-1.28055	-1.13518	-0.388729	-0.584026	-0.282321		164.458	130.871	163.185	152.469	97.4704	140.841	110.176
						-0.167847	-0.32223	-0.400798	-0.521705	-0.562395	-0.256348	-0.592318	-0.393338		-0.509898	-0.509898	-0.142415	-1.297	-1.05835	-0.952684	-1.03224	-1.12364	-0.874868	-0.857814	-0.611621		-0.574748	-0.901656	-4.58473	-6.3309	-13.0242	-8.56287	0.27771	-0.897217	-0.251321	-1.35016	-1.25687	-1.13067	-0.432462	-0.607751	-0.343618		185.133	125.287	200.484	145.767	122.526	120.817	113.242
						-0.188192	-0.263887	-0.327555	-0.479562	-0.453404	-0.256348	-0.599254	-0.366211		-0.579834	-0.579834	-0.142415	-1.25122	-1.12671	-0.922258	-1.09105	-1.15855	-0.860871	-0.898608	-0.599154		-0.709534	-0.973788	-4.61312	-8.47312	-13.4739	-8.58082	0.265503	-0.906808	-0.246833	-1.32256	-1.28576	-1.08649	-0.422825	-0.568407	-0.329956		151.302	115.167	161.631	135.714	139.331	127.7	116.76
						-0.203451	-0.252219	-0.303141	-0.494094	-0.453404	-0.272624	-0.588157	-0.466806		-0.610352	-0.610352	-0.223796	-1.22579	-1.08154	-0.912958	-1.06458	-1.12433	-0.819706	-0.804875	-0.533453		-0.6663	-0.901656	-5.56414	-5.74449	-13.5758	-11.7223	0.286865	-0.802176	-0.384162	-1.28613	-1.3458	-1.04395	-0.460654	-0.562487	-0.295462		140.025	118.657	161.631	172.993	146.664	124.602	113.311
						-0.193278	-0.261195	-0.331624	-0.569661	-0.453404	-0.252279	-0.568737	-0.533493		-0.62561	-0.62561	-0.189887	-1.42415	-1.09009	-0.937479	-1.051	-1.16669	-0.819952	-0.800308	-0.675257		-0.740051	-0.757391	-5.86221	-7.77899	-14.49	-10.0528	0.143433	-0.861468	-0.304278	-1.45282	-1.27761	-1.10922	-0.435781	-0.574679	-0.312104		153.181	136.804	161.631	197.707	150.331	123.012	117.58
						-0.178019	-0.243243	-0.339762	-0.435965	-0.466483	-0.223796	-0.539606	-0.610352		-0.448863	-0.448863	-0.186496	-1.31226	-1.12183	-1.01849	-1.12992	-1.18269	-0.894585	-0.788163	-0.583934		-0.419617	-0.557639	-3.29306	-7.36012	-13.5504	-9.83743	0.204468	-0.93035	-0.373392	-1.35639	-1.2693	-1.12738	-0.443063	-0.605196	-0.327631		156.94	104.697	166.293	226.19	107.859	132.249	119.193
						-0.218709	-0.232472	-0.335693	-0.588553	-0.357492	-0.201416	-0.590238	-0.517669		-0.499725	-0.499725	-0.24075	-1.30208	-1.18774	-1.04193	-1.09571	-1.23144	-0.928025	-0.814944	-0.618092		-0.267029	-0.610352	-4.05955	-10.8906	-14.3679	-10.9325	0.259399	-0.898961	-0.306971	-1.26973	-1.292	-1.14683	-0.436088	-0.586121	-0.345805		155.061	141.341	127.439	191.842	120.081	128.246	124.106
						-0.239054	-0.258502	-0.333659	-0.520252	-0.553676	-0.138346	-0.692194	-0.454373		-0.475566	-0.475566	-0.183105	-1.26648	-1.10474	-0.968225	-1.05143	-1.18679	-0.905966	-0.882726	-0.625281		-0.434875	-0.549316	-6.1319	-11.5009	-13.1949	-9.08347	0.244141	-0.917271	-0.295302	-1.31981	-1.37924	-1.07928	-0.466498	-0.609388	-0.331104		154.121	124.938	197.376	168.386	114.276	123.063	119.606
						-0.157674	-0.228882	-0.351969	-0.565302	-0.431606	-0.191243	-0.640869	-0.497323		-0.44632	-0.44632	-0.217014	-1.34277	-1.08521	-1.03448	-1.14146	-1.16368	-0.842561	-0.897881	-0.582526		-0.615438	-0.432795	-6.42998	-5.75645	-13.7352	-9.40659	0.20752	-0.840541	-0.294405	-1.18147	-1.23736	-1.08548	-0.422932	-0.607124	-0.337269		162.579	135.757	153.86	184.303	107.248	133.601	117.277
						-0.233968	-0.160666	-0.345866	-0.517346	-0.37493	-0.191243	-0.550704	-0.475848		-0.433604	-0.433604	-0.172933	-1.21562	-1.08032	-1.02654	-1.12649	-1.17125	-0.838262	-0.911894	-0.610719		-0.691732	-0.446666	-4.64151	-7.45586	-12.7648	-12.4404	0.289917	-0.851004	-0.231575	-1.3599	-1.22323	-1.09539	-0.474697	-0.619071	-0.337223		159.76	124.241	133.656	176.344	104.193	131.848	118.04
						-0.188192	-0.260297	-0.284831	-0.462123	-0.444685	-0.197347	-0.676935	-0.4815		-0.593821	-0.593821	-0.244141	-1.18001	-1.15234	-1.02525	-1.10056	-1.11417	-0.828503	-0.844008	-0.546808		-0.521342	-0.460538	-4.75506	-9.33479	-13.4745	-11.7941	0.262451	-0.80392	-0.434427	-1.36752	-1.32475	-1.13535	-0.443691	-0.628356	-0.356682		131.567	110.979	158.522	178.439	142.692	128.813	112.288
						-0.178019	-0.248628	-0.305176	-0.575474	-0.427246	-0.134277	-0.649886	-0.502975		-0.701904	-0.701904	-0.223796	-1.31734	-1.12305	-1.11537	-1.06819	-1.18552	-0.863594	-0.803837	-0.594535		-0.417074	-0.443892	-6.98356	-7.98244	-13.5792	-9.76562	0.210571	-0.940813	-0.335693	-1.18835	-1.29621	-1.15309	-0.414994	-0.574342	-0.375222		140.964	138.2	152.306	186.397	168.664	125.025	119.478
						-0.172933	-0.297995	-0.244141	-0.556583	-0.401088	-0.179036	-0.703985	-0.498454		-0.321706	-0.321706	-0.12207	-1.32243	-1.16211	-1.12514	-1.1366	-1.15861	-0.911351	-0.753182	-0.541836		-0.335693	-0.418923	-5.69188	-9.78956	-14.0292	-9.15527	0.231934	-0.86234	-0.306971	-1.30869	-1.30043	-1.15855	-0.431452	-0.580828	-0.379672		112.772	133.663	142.981	184.722	77.3041	133.032	116.766
						-0.167847	-0.246833	-0.364176	-0.574021	-0.558036	-0.197347	-0.552091	-0.472457		-0.518799	-0.518799	-0.139025	-1.37329	-1.11328	-1.0514	-1.05328	-1.18014	-0.925103	-0.860512	-0.561156		-0.493368	-0.321822	-5.23767	-3.49456	-13.1457	-11.2017	0.195312	-0.879778	-0.238755	-1.27166	-1.30051	-1.12664	-0.429036	-0.611514	-0.402313		168.218	137.851	198.93	175.088	124.664	123.279	118.935
						-0.172933	-0.213623	-0.404867	-0.549316	-0.370571	-0.244141	-0.579834	-0.449852		-0.55186	-0.55186	-0.145806	-1.32243	-1.10107	-1.02905	-1.08695	-1.15785	-0.869912	-0.922067	-0.603912		-0.59255	-0.413374	-5.46478	-8.55689	-13.4201	-9.78358	0.195312	-0.942557	-0.190286	-1.29697	-1.2853	-1.20674	-0.421937	-0.615124	-0.408752		187.013	131.918	132.102	166.71	132.609	127.22	116.689
						-0.203451	-0.314152	-0.364176	-0.512986	-0.366211	-0.242106	-0.644337	-0.418204		-0.542959	-0.542959	-0.15937	-1.42415	-1.06201	-1.02111	-1.25064	-1.19453	-0.817213	-0.892276	-0.625083		-0.419617	-0.360662	-5.19509	-10.1845	-13.1184	-10.5196	0.219727	-0.786482	-0.390445	-1.24229	-1.34257	-1.14465	-0.388452	-0.613778	-0.380423		168.218	123.194	130.548	154.982	130.47	146.379	120.386
						-0.254313	-0.227984	-0.374349	-0.552223	-0.431606	-0.215658	-0.644337	-0.461155		-0.376383	-0.376383	-0.166151	-1.20036	-1.05469	-1.03255	-1.17221	-1.29209	-0.810743	-0.902968	-0.5536		-0.46285	-0.124845	-4.47118	-7.41996	-13.1863	-10.8786	0.17395	-0.85362	-0.413782	-1.27311	-1.27161	-1.15099	-0.424662	-0.60538	-0.395987		172.916	132.616	153.86	170.899	90.4428	137.2	130.219
						-0.188192	-0.328513	-0.362142	-0.521705	-0.405448	-0.189209	-0.649886	-0.493933		-0.361125	-0.361125	-0.149197	-1.24105	-1.10596	-1.07804	-1.25221	-1.17337	-0.885561	-0.810169	-0.539725		-0.328064	-0.210849	-5.43639	-7.74309	-13.0897	-10.0349	0.250244	-0.790841	-0.188491	-1.28613	-1.22385	-1.17091	-0.437433	-0.615858	-0.429189		167.278	125.287	144.535	183.046	86.7762	146.564	118.254
						-0.137329	-0.12207	-0.303141	-0.590007	-0.427246	-0.172933	-0.58677	-0.421595		-0.602722	-0.602722	-0.172933	-1.34786	-1.11816	-1.04659	-1.15251	-1.19817	-0.963484	-0.75858	-0.559244		-0.409444	-0.258012	-5.6493	-5.84023	-12.9835	-8.02433	0.268555	-0.93035	-0.191184	-1.28018	-1.36534	-1.13619	-0.425503	-0.613671	-0.3738		140.025	141.69	152.306	156.238	144.831	134.894	120.753
						-0.188192	-0.112197	-0.327555	-0.595819	-0.435965	-0.140381	-0.591625	-0.44194		-0.695546	-0.695546	-0.196669	-1.297	-1.19629	-0.914357	-1.11341	-1.17002	-0.924568	-0.783077	-0.602825		-0.424703	-0.241366	-6.11771	-9.34676	-14.0996	-8.52697	0.177002	-0.921631	-0.311459	-1.24877	-1.35091	-1.15052	-0.444684	-0.598863	-0.417395		151.302	143.086	155.414	163.778	167.136	130.317	117.916
						-0.188192		-0.297038	-0.576928	-0.427246	-0.20752	-0.688726	-0.490542		-0.591278	-0.591278	-0.142415	-1.3682	-1.15845	-0.976516	-1.08145	-1.13308	-0.84721	-0.831655	-0.627867		-0.480652	-0.0971014	-5.59252	-7.45586	-14.0855	-11.3992	0.231934	-0.88501	-0.441607	-1.23949	-1.32873	-1.07255	-0.438062	-0.611453	-0.389019		137.205	138.549	152.306	181.789	142.081	126.577	114.193
						-0.249227		-0.362142	-0.486828	-0.479562	-0.211589	-0.729648	-0.508626		-0.356038	-0.356038	-0.172933	-1.32751	-1.14868	-1.10928	-1.11376	-1.25012	-0.858178	-0.784531	-0.521705		-0.404358	-0.0388406	-6.69967	-3.98524	-13.8579	-12.2609	0.219727	-0.806536	-0.251321	-1.17834	-1.28002	-1.11275	-0.407544	-0.60359	-0.406687		167.278	116.912	170.955	188.491	85.554	130.359	125.988
						-0.193278		-0.349935	-0.54641	-0.479562	-0.252279	-0.624223	-0.560619		-0.451406	-0.451406	-0.125461	-1.34786	-1.20972	-0.956217	-1.12005	-1.21411	-0.870324	-0.81536	-0.541836		-0.368754	-0.0832298	-6.16029	-6.64206	-13.592	-9.4784	0.308228	-0.836182	-0.263887	-1.34621	-1.27747	-1.18674	-0.438198	-0.601127	-0.393409		161.639	131.22	170.955	207.759	108.47	131.094	122.359
						-0.208537		-0.376383	-0.499907	-0.50136	-0.238037	-0.608271	-0.474718		-0.570933	-0.570933	-0.15937	-1.41398	-1.11572	-1.17484	-1.16625	-1.18301		-0.769063	-0.639033		-0.38147	-0.16646	-3.87502	-6.54632	-12.8712	-8.49107	0.375366	-0.848389	-0.264785	-1.20412	-1.35598	-1.13941	-0.457887	-0.578641	-0.312994		173.856	120.053	178.726	175.925	137.192	136.502	119.225
						-0.233968		-0.406901	-0.671387	-0.470843	-0.250244	-0.617981	-0.461155		-0.59255	-0.59255	-0.16276	-1.23088	-1.0791	-1.07859	-1.21335	-1.16282		-0.820031	-0.53922		-0.394185	-0.113747	-4.03116	-10.5914	-12.7051	-11.3992	0.210571	-0.90332	-0.457764	-1.17319	-1.33153	-1.14882	-0.442666	-0.583062	-0.328886		187.953	161.233	167.847	170.899	142.386	142.014	117.19
						-0.244141		-0.368245	-0.581287	-0.427246	-0.217692	-0.679016	-0.434028		-0.511169	-0.511169	-0.149197	-1.27157	-1.12671	-0.931926	-1.09738	-1.17544		-0.867155	-0.52969		-0.572205	-0.22472	-4.64151	-4.7033	-12.4405	-10.1785	0.244141	-0.870187	-0.231575	-1.26682	-1.35292	-1.25818	-0.44181	-0.595039	-0.360231		170.097	139.596	152.306	160.846	122.831	128.441	118.462
						-0.244141		-0.362142	-0.523158	-0.470843	-0.250244	-0.600641	-0.389947		-0.647227	-0.647227	-0.169542	-1.30717	-1.15601	-0.910801	-1.13527	-1.2494		-0.865703	-0.536452		-0.434875	-0.188654	-4.14471	-9.20314	-12.6601	-8.27565	0.32959	-0.855364	-0.38865	-1.16141	-1.35042	-1.21985	-0.461052	-0.601754	-0.405494		167.278	125.636	167.847	144.51	155.525	132.876	125.916
						-0.178019		-0.366211	-0.491188	-0.427246	-0.211589	-0.653354	-0.428376		-0.386556	-0.386556	-0.16276	-1.24105	-1.1499	-0.998009	-1.06784	-1.21605		-0.867778	-0.578121		-0.556946	-0.241366	-4.62732	-6.57026	-13.7725	-7.95252	0.256348	-0.805664	-0.227984	-1.11762	-1.29889	-1.19029	-0.425564	-0.587727	-0.39572		169.157	117.959	152.306	158.752	92.8872	124.984	122.555
						-0.137329		-0.421143	-0.594366	-0.422886	-0.256348	-0.597174	-0.376383		-0.534058	-0.534058	-0.16276	-1.23596	-1.12793	-0.986613	-1.20349	-1.09902		-0.891031	-0.568897		-0.305176	-0.246915	-6.41579	-3.07569	-13.3512	-9.56816	0.341797	-0.905064	-0.372494	-1.22102	-1.34747	-1.25068	-0.415789	-0.562426	-0.399482		194.531	142.737	150.752	139.484	128.331	140.861	110.76
						-0.137329		-0.309245	-0.601632	-0.488281	-0.244141	-0.606884	-0.566271		-0.467936	-0.467936	-0.223796	-1.25122	-1.04126	-0.908322	-1.16501	-1.15707		-0.905147	-0.514026		-0.307719	-0.202526	-6.72806	-12.7097	-12.9661	-9.78358	0.296021	-0.905064	-0.38865	-1.25281	-1.25907	-1.15551	-0.435308	-0.597395	-0.347027		142.844	144.482	174.064	209.854	112.442	136.356	116.61
						-0.188192		-0.339762	-0.549316	-0.523158	-0.22583	-0.651273	-0.509757		-0.50354	-0.50354	-0.206841	-1.31226	-1.03027	-0.79852	-1.16681	-1.22382		-0.912102	-0.551137		-0.353495	-0.0971014	-7.72166	-5.5171	-13.5012	-9.29889	0.213623	-0.905936	-0.255809	-1.18385	-1.28974	-1.11824	-0.465519	-0.58632	-0.338019		156.94	131.918	186.497	188.91	120.998	136.568	123.338
						-0.208537		-0.335693	-0.518799	-0.457764	-0.301107	-0.6159	-0.500714		-0.587463	-0.587463	-0.220405	-1.31734	-1.11938	-0.88657	-1.19006	-1.18407		-0.867467	-0.55438		-0.50354	-0.0554865	-5.50736	-6.72583	-12.6084	-9.38864	0.311279	-0.931222	-0.345567	-1.26329	-1.28787	-1.17472	-0.435125	-0.605151	-0.340939		155.061	124.59	163.185	185.559	141.164	139.289	119.332
						-0.172933		-0.358073	-0.585647	-0.479562	-0.199382	-0.742132	-0.436288		-0.425975	-0.425975	-0.176324	-1.3326	-1.12305	-0.940446	-1.16926	-1.11912		-0.826777	-0.55591		-0.493368	-0.00832298	-7.08292	-12.1951	-13.4739	-10.6632	0.280762	-0.86234	-0.333001	-1.12924	-1.25159	-1.238	-0.368245	-0.579712	-0.416216		165.398	140.643	170.955	161.684	102.359	136.854	112.786
						-0.167847		-0.32959	-0.576928	-0.409807	-0.233968	-0.643643	-0.473588		-0.603994	-0.603994	-0.16276	-1.35295	-1.09497	-0.88166	-1.17726	-1.19407		-0.787747	-0.543641		-0.427246	0.0194203	-6.78484	-5.74449	-13.3216	-11.6685	0.283813	-0.810024	-0.412885	-1.18743	-1.31856	-1.19595	-0.433058	-0.582924	-0.414198		152.242	138.549	146.089	175.506	145.136	137.791	120.34
						-0.16276		-0.30721	-0.531878	-0.488281	-0.152588	-0.71855	-0.458894		-0.455221	-0.455221	-0.111898	-1.28174	-1.15601	-0.798153	-1.12191	-1.2081		-0.795532	-0.577907		-0.37384	-0.0776811	-6.1461	-3.39882	-13.6082	-10.4657	0.38147	-0.821359	-0.284532	-1.2155	-1.30765	-1.185	-0.490683	-0.607812	-0.42457		141.904	127.73	174.064	170.061	109.387	131.313	121.753
						-0.213623		-0.345866	-0.514439	-0.470843	-0.164795	-0.588851	-0.448721		-0.562032	-0.562032	-0.128852	-1.24613	-1.21338	-0.71506	-1.18414	-1.18898		-0.791693	-0.646101		-0.434875	-0.113747	-4.95378	-7.56357	-13.1102	-10.9863	0.213623	-0.921631	-0.295302	-1.2648	-1.36691	-1.171	-0.44447	-0.591704	-0.473442		159.76	123.543	167.847	166.291	135.053	138.596	119.826
						-0.279744		-0.419108	-0.555129	-0.553676	-0.24821	-0.632546	-0.491672		-0.550588	-0.550588	-0.220405	-1.34277	-1.12427	-0.705224	-1.15226	-1.15883		-0.801138	-0.555282		-0.409444	-0.016646	-5.62091	-3.69801	-13.4036	-11.094	0.271606	-0.942557	-0.324025	-1.16236	-1.4026	-1.22255	-0.45527	-0.594259	-0.419215		193.591	133.314	197.376	182.208	132.303	134.865	116.788
						-0.203451		-0.301107	-0.611805	-0.431606	-0.252279	-0.647111	-0.515408		-0.508626	-0.508626	-0.193278	-1.27157	-1.08276	-0.60203	-1.14764	-1.10995		-0.876913	-0.563191		-0.289917	0.119296	-4.79765	-5.75645	-13.6333	-9.67587	0.219727	-0.90332	-0.237858	-1.12467	-1.35526	-1.16141	-0.474943	-0.566755	-0.38348		139.085	146.925	153.86	191.005	122.22	134.324	111.862
						-0.172933		-0.301107	-0.607445	-0.51008	-0.215658	-0.715082	-0.504105		-0.511169	-0.511169	-0.206841	-1.21562	-1.06812	-0.581624	-1.18898	-1.11809		-0.826673	-0.522944		-0.516256	-0.00277433	-5.42219	-6.94125	-13.0817	-9.60406	0.302124	-0.830078	-0.241448	-1.14318	-1.34126	-1.19805	-0.432599	-0.575153	-0.405079		139.085	145.878	181.834	186.816	122.831	139.162	112.682
						-0.16276		-0.364176	-0.623431	-0.51008	-0.211589	-0.585383	-0.496193		-0.30899	-0.30899	-0.227186	-1.297	-1.16333	-0.607873	-1.25575	-1.20596		-0.796467	-0.589502		-0.401815	0.0388406	-5.32283	-12.2669	-13.279	-11.3274	0.286865	-0.877162	-0.272863	-1.08283	-1.32159	-1.16511	-0.513415	-0.581777	-0.420653		168.218	149.717	181.834	183.884	74.2486	146.977	121.538
						-0.213623		-0.333659	-0.572568	-0.435965	-0.170898	-0.55001	-0.480369		-0.54423	-0.54423	-0.142415	-1.27665	-1.12305	-0.61745	-1.20593	-1.21396		-0.773009	-0.54566		-0.401815	-0.0194203	-5.98996	-8.34147	-13.0955	-12.4943	0.311279	-0.831822	-0.185798	-1.12372	-1.33695	-1.30184	-0.476104	-0.619209	-0.457534		154.121	137.502	155.414	178.02	130.775	141.146	122.344
						-0.269572		-0.301107	-0.55077	-0.431606	-0.111898	-0.575673	-0.426116		-0.652313	-0.652313	-0.108507	-1.29191	-1.15479	-0.635439	-1.14988	-1.17311		-0.749238	-0.617847		-0.493368	-0.0221946	-6.65709	-12.4344	-13.8154	-10.9504	0.262451	-0.881522	-0.365313	-1.23565	-1.35662	-1.16287	-0.436455	-0.566587	-0.426862		139.085	132.267	153.86	157.914	156.747	134.586	118.228
						-0.193278		-0.319417	-0.544957	-0.483922	-0.26652	-0.68179	-0.455503		-0.597636	-0.597636	-0.0915527	-1.297	-1.13037	-0.609326	-1.21702	-1.21858		-0.756816	-0.637274		-0.457764	0.0194203	-4.93959	-8.35344	-13.6584	-12.7635	0.289917	-0.920759	-0.371596	-1.1902	-1.32073	-1.22633	-0.455041	-0.585433	-0.379689		147.543	130.871	172.51	168.805	143.609	142.444	122.81
						-0.269572		-0.398763	-0.556583	-0.483922	-0.233968	-0.681097	-0.397859		-0.514984	-0.514984	-0.108507	-1.19527	-1.13525	-0.652342	-1.19857	-1.17565		-0.851067	-0.590343		-0.493368	-0.172008	-6.3874	-9.28692	-14.2296	-10.1606	0.259399	-0.88065	-0.463149	-1.16623	-1.2956	-1.14189	-0.484043	-0.599537	-0.365598		184.194	133.663	172.51	147.442	123.748	140.285	118.484
						-0.233968		-0.345866	-0.520252	-0.475202	-0.250244	-0.580528	-0.458894		-0.489553	-0.489553	-0.203451	-1.297	-1.18286	-0.642016	-1.19615	-1.15873		-0.843386	-0.502079		-0.378927	0.00832298	-6.79903	-5.85219	-13.6196	-13.1226	0.250244	-0.933838	-0.314152	-1.19282	-1.26899	-1.24819	-0.454812	-0.606833	-0.368658		159.76	124.938	169.401	170.061	117.637	140.002	116.779
						-0.198364		-0.345866	-0.5871	-0.466483	-0.195312	-0.577753	-0.420464		-0.461578	-0.461578	-0.217014	-1.27665	-1.16577	-0.665589	-1.21339	-1.15197		-0.858436	-0.573455		-0.325521	-0.00554865	-5.72027	-7.15667	-13.9344	-11.6326	0.244141	-0.917271	-0.272863	-1.01479	-1.31175	-1.21174	-0.454567	-0.594519	-0.42145		159.76	140.992	166.293	155.82	110.915	142.02	116.097
						-0.213623		-0.415039	-0.518799	-0.523158	-0.158691	-0.688033	-0.464545		-0.403086	-0.403086	-0.186496	-1.32751	-1.14136	-0.64116	-1.25804	-1.15594		-0.877018	-0.536436		-0.409444	0.0249689	-6.33062	-7.1447	-12.8535	-14.0919	0.32959	-0.746373	-0.183105	-1.16014	-1.28411	-1.316	-0.473534	-0.606818	-0.418222		191.712	124.59	186.497	172.155	96.8593	147.246	116.496
						-0.239054		-0.408936	-0.498454	-0.418527	-0.254313	-0.70884	-0.504105		-0.687917	-0.687917	-0.24075	-1.34277	-1.18652	-0.800646	-1.14298	-1.17888		-0.847018	-0.561875		-0.406901	0.0443892	-7.05453	-5.80432	-13.7291	-9.89129	0.286865	-0.814383	-0.309664	-1.14201	-1.33554	-1.32541	-0.429082	-0.595896	-0.439959		188.892	119.704	149.197	186.816	165.303	133.778	118.809
						-0.172933		-0.32959	-0.610352	-0.396729	-0.170898	-0.650579	-0.475848		-0.499725	-0.499725	-0.125461	-1.28174	-1.14136	-0.7269	-1.1703	-1.15892		-0.829164	-0.581241		-0.205994	0	-6.35901	-4.22459	-13.015	-11.3633	0.222778	-0.90332	-0.321332	-1.14431	-1.36433	-1.23972	-0.487807	-0.590098	-0.383388		152.242	146.576	141.427	176.344	120.081	136.976	116.797
						-0.223796		-0.374349	-0.637963	-0.440325	-0.227865	-0.58677	-0.455503		-0.474294	-0.474294	-0.0915527	-1.30717	-1.16211	-0.7954	-1.15422	-1.20657		-0.838299	-0.549944		-0.348409	-0.0471635	-5.03895	-10.1366	-12.9404	-8.40131	0.256348	-0.883266	-0.332103	-1.1732	-1.39685	-1.27069	-0.482867	-0.580339	-0.365002		172.916	153.207	156.968	168.805	113.97	135.094	121.599
						-0.208537		-0.356038	-0.534784	-0.331334	-0.282796	-0.67208	-0.496193		-0.30009	-0.30009	-0.183105	-1.29191	-1.12061	-0.809702	-1.20056	-1.24183		-0.778821	-0.591322		-0.465393	-0.147039	-5.93319	-7.15667	-12.9453	-8.31155	0.22583	-0.974819	-0.349157	-1.23163	-1.33055	-1.24247	-0.473336	-0.614971	-0.385453		164.458	128.428	118.115	183.884	72.1098	140.517	125.153
						-0.147502		-0.315348	-0.539144	-0.422886	-0.223796	-0.590238	-0.471327		-0.54423	-0.54423	-0.176324	-1.24105	-1.10229	-0.901836	-1.26771	-1.22774		-0.748199	-0.590511		-0.208537	-0.0971014	-6.08932	-12.2429	-13.038	-10.0349	0.241089	-0.895473	-0.370699	-1.12968	-1.29817	-1.18526	-0.449167	-0.599628	-0.442496		145.663	129.475	150.752	174.669	130.775	148.377	123.733
						-0.193278		-0.317383	-0.568208	-0.50572	-0.134277	-0.568737	-0.353778		-0.511169	-0.511169	-0.223796	-1.36312	-1.07056	-0.906013	-1.21183	-1.10275		-0.740207	-0.573547		-0.353495	-0.0943271	-5.76285	-6.39074	-12.7963	-10.376	0.228882	-0.95302	-0.363518	-1.11156	-1.28302	-1.23386	-0.548872	-0.618245	-0.455269		146.603	136.455	180.28	131.106	122.831	141.837	111.136
						-0.269572		-0.337728	-0.492641	-0.575474	-0.124105	-0.707453	-0.436288		-0.509898	-0.509898	-0.186496	-1.3326	-1.10718	-0.837054	-1.24369	-1.13658		-0.784531	-0.55337		-0.442505	-0.0443892	-6.89839	-10.352	-13.3959	-9.85538	0.183105	-1.02277	-0.345567	-1.0687	-1.28975	-1.19785	-0.510584	-0.608103	-0.425534		156.001	118.308	205.146	161.684	122.526	145.566	114.546
						-0.239054		-0.274658	-0.562395	-0.479562	-0.20752	-0.710227	-0.435158		-0.591278	-0.591278	-0.142415	-1.23596	-1.13037	-0.890547	-1.27346	-1.15847		-0.755466	-0.512313		-0.193278	-0.00554865	-5.22347	-9.11937	-13.4623	-8.70649	0.198364	-0.898961	-0.424553	-1.17896	-1.31089	-1.22708	-0.457121	-0.596003	-0.445418		126.868	135.059	170.955	161.265	142.081	149.051	116.752
						-0.193278		-0.331624	-0.55077	-0.475202	-0.292969	-0.676935	-0.408031		-0.556946	-0.556946	-0.0983344	-1.34786	-1.08765	-1.08626	-1.21105	-1.1775		-0.778821	-0.557822		-0.411987	0.0332919	-6.31643	-6.98912	-12.2009	-9.5143	0.213623	-0.866699	-0.306971	-1.1729	-1.33389	-1.15984	-0.480235	-0.620188	-0.436148		153.181	132.267	169.401	151.212	133.831	141.746	118.67
						-0.249227		-0.354004	-0.566755	-0.483922	-0.16276	-0.624223	-0.56288		-0.41453	-0.41453	-0.24075	-1.32243	-1.15845	-1.16103	-1.21949	-1.17448		-0.8274	-0.566418		-0.246684	-0.0277433	-4.75506	-3.90146	-12.4096	-14.1278	0.262451	-0.905064	-0.551112	-1.12859	-1.38556	-1.17227	-0.44369	-0.626368	-0.407895		163.519	136.106	172.51	208.597	99.6093	142.734	118.365
						-0.12207		-0.345866	-0.566755	-0.531878	-0.16276	-0.617287	-0.545926		-0.623067	-0.623067	-0.155979	-1.25122	-1.14014	-1.10227	-1.1878	-1.23712		-0.855945	-0.566541		-0.310262	-0.0943271	-5.49316	-10.8188	-12.8012	-12.4763	0.149536	-0.894601	-0.356338	-1.26736	-1.3678	-1.26084	-0.486705	-0.599751	-0.446213		159.76	136.106	189.605	202.314	149.719	139.024	124.678
						-0.16276		-0.333659	-0.514439	-0.453404	-0.152588	-0.640176	-0.450982		-0.431061	-0.431061	-0.186496	-1.22579	-1.1853	-0.987378	-1.20883	-1.22078		-0.89622	-0.574281		-0.549316	-0.0138716	-5.97577	-5.80432	-13.5841	-12.4045	0.283813	-0.798689	-0.402114	-1.21065	-1.31802	-1.17957	-0.468227	-0.620142	-0.451139		154.121	123.543	161.631	167.129	103.581	141.486	123.031
						-0.218709		-0.376383	-0.518799	-0.527518	-0.158691	-0.638095	-0.415943		-0.541687	-0.541687	-0.152588	-1.24613	-1.15479	-1.0702	-1.23537	-1.12594		-0.847123	-0.610811		-0.16276	-0.0249689	-5.22347	-8.01834	-13.7303	-10.7171	0.262451	-0.890241	-0.309664	-1.08385	-1.28122	-1.15915	-0.543015	-0.621901	-0.467371		173.856	124.59	188.051	154.144	130.164	144.592	113.473
						-0.233968		-0.32959	-0.494094	-0.466483	-0.223796	-0.670693	-0.445331		-0.415802	-0.415802	-0.128852	-1.23088	-1.11206	-0.971025	-1.19473	-1.21618		-0.80664	-0.593005		-0.401815	-0.0249689	-5.74866	-7.87473	-13.5079	-7.61144	0.259399	-0.894601	-0.284532	-1.11356	-1.2662	-1.16337	-0.473413	-0.62031	-0.435277		152.242	118.657	166.293	165.035	99.9148	139.835	122.567
						-0.223796		-0.335693	-0.556583	-0.558036	-0.16276	-0.720631	-0.415943		-0.525157	-0.525157	-0.139025	-1.35295	-1.04858	-0.957472	-1.25122	-1.14558		-0.762733	-0.543764		-0.167847	-0.135942	-4.69829	-6.80961	-12.4656	-9.62201	0.27771	-0.998361	-0.284532	-1.05462	-1.3332	-1.20021	-0.413019	-0.593678	-0.405679		155.061	133.663	198.93	154.144	126.192	146.447	115.453
						-0.218709		-0.356038	-0.502813	-0.51008	-0.189209	-0.669306	-0.336824		-0.465393	-0.465393	-0.210232	-1.297	-1.19141	-1.00431	-1.19109	-1.18376		-0.743944	-0.556552		-0.289917	-0.12207	-7.18228	-5.50513	-12.0938	-11.094	0.234985	-1.00534	-0.253116	-1.21646	-1.37673	-1.29142	-0.4378	-0.61231	-0.412975		164.458	120.751	181.834	124.823	111.831	139.409	119.301
						-0.16276		-0.2889	-0.646682	-0.475202	-0.177002	-0.676242	-0.391077		-0.539144	-0.539144	-0.220405	-1.35295	-1.1853	-0.926587	-1.25396	-1.13922		-0.762317	-0.504557		-0.167847	-0.172008	-5.1525	-10.8188	-13.1515	-8.86805	0.262451	-0.869315	-0.402114	-1.22213	-1.38111	-1.24236	-0.496802	-0.600057	-0.401547		133.446	155.301	169.401	144.929	129.553	146.768	114.811
						-0.223796		-0.313314	-0.531878	-0.518799	-0.158691	-0.63324	-0.445331		-0.658671	-0.658671	-0.233968	-1.27665	-1.17676	-1.14965	-1.29462	-1.18053		-0.844839	-0.577432		-0.058492	-0.12207	-5.54994	-7.18061	-13.1631	-8.67058	0.198364	-0.887626	-0.313254	-1.11252	-1.37871	-1.24408	-0.519012	-0.624058	-0.378877		144.723	127.73	184.943	165.035	158.275	151.527	118.975
						-0.228882		-0.3479	-0.581287	-0.553676	-0.166829	-0.605496	-0.454373		-0.615438	-0.615438	-0.105116	-1.26139	-1.10596	-1.00835	-1.27094	-1.21015		-0.829373	-0.59406		-0.335693	-0.0110973	-6.84162	-7.73112	-12.6926	-7.62939	0.283813	-0.834438	-0.315947	-1.19675	-1.33084	-1.21188	-0.460394	-0.622115	-0.435667		160.699	139.596	197.376	168.386	147.886	148.755	121.96
						-0.244141		-0.382487	-0.616164	-0.527518	-0.183105	-0.645724	-0.502975		-0.475566	-0.475566	-0.101725	-1.2207	-1.17676	-0.963009	-1.28289	-1.19516		-0.860616	-0.577601		-0.241597	-0.124845	-6.28804	-4.10491	-12.6555	-9.24503	0.280762	-0.899833	-0.343772	-1.15261	-1.36849	-1.1969	-0.487945	-0.630421	-0.448081		176.675	147.972	188.051	186.397	114.276	150.153	120.449
						-0.16276		-0.297038	-0.517346	-0.470843	-0.272624	-0.601335	-0.456633		-0.614166	-0.614166	-0.145806	-1.28682	-1.23413	-1.05693	-1.33182	-1.22003		-0.837883	-0.576316		-0.175476	-0.0138716	-6.37321	-12.3506	-12.5815	-9.69382	0.299072	-0.846645	-0.335693	-1.2379	-1.33589	-1.24905	-0.480649	-0.610841	-0.488541		137.205	124.241	167.847	169.223	147.581	155.881	122.956
						-0.208537		-0.358073	-0.605992	-0.427246	-0.246175	-0.638095	-0.52219		-0.378927	-0.378927	-0.196669	-1.25122	-1.13281	-1.04717	-1.2903	-1.24316		-0.813075	-0.544391		-0.272115	-0.0138716	-4.95378	-4.34427	-13.3577	-11.1299	0.308228	-0.952148	-0.326718	-1.12306	-1.37534	-1.28212	-0.461511	-0.599751	-0.470339		165.398	145.529	152.306	193.518	91.0539	151.022	125.287
						-0.208537		-0.272624	-0.620524	-0.470843	-0.156657	-0.657515	-0.471327		-0.73878	-0.73878	-0.213623	-1.23596	-1.16333	-1.17992	-1.25058	-1.21899		-0.774668	-0.546701		-0.282288	-0.0554865	-5.3938	-8.11409	-13.3941	-11.7941	0.311279	-0.968715	-0.395831	-1.15723	-1.39342	-1.23345	-0.466788	-0.624287	-0.466087		125.928	149.019	167.847	174.669	177.525	146.372	122.851
						-0.178019		-0.26652	-0.549316	-0.38365	-0.199382	-0.632546	-0.449852		-0.420888	-0.420888	-0.145806	-1.32243	-1.19141	-1.03598	-1.27111	-1.28544		-0.788163	-0.576453		-0.109355	0.0138716	-5.60672	-5.73252	-12.8816	-7.32422	0.247192	-1.01667	-0.370699	-1.17313	-1.43771	-1.26173	-0.484013	-0.630559	-0.473766		123.109	131.918	136.764	166.71	101.137	148.775	129.548
						-0.152588		-0.358073	-0.54641	-0.592913	-0.223796	-0.695662	-0.422725		-0.56076	-0.56076	-0.0576443	-1.32751	-1.20361	-1.10594	-1.27557	-1.18509		-0.832798	-0.540643		-0.0178019	0.0471635	-7.26744	-5.21791	-12.7235	-7.03699	0.302124	-0.93471	-0.32582	-1.19806	-1.34426	-1.23184	-0.488205	-0.607812	-0.474683		165.398	131.22	211.363	156.657	134.748	149.298	119.435
						-0.259399		-0.374349	-0.533331	-0.409807	-0.205485	-0.664451	-0.40238		-0.382741	-0.382741	-0.128852	-1.36312	-1.19995	-1.18407	-1.27755	-1.13094		-0.867364	-0.614834		-0.249227	-0.00832298	-6.85581	-4.27246	-12.8412	-9.83743	0.259399	-0.910296	-0.308766	-1.25555	-1.3216	-1.32221	-0.49931	-0.613457	-0.433074		172.916	128.079	146.089	149.118	91.9705	149.529	113.977
						-0.203451		-0.408936	-0.521705	-0.414167	-0.282796	-0.646418	-0.378644		-0.706991	-0.706991	-0.15937	-1.35295	-1.21338	-1.10538	-1.25665	-1.1208		-0.818681	-0.631018		-0.384013	-0.0665838	-5.18089	-4.00917	-12.5922	-11.1479	0.247192	-0.874547	-0.29261	-1.26821	-1.30069	-1.25313	-0.46122	-0.622421	-0.465949		188.892	125.287	147.643	140.321	169.886	147.083	112.955
						-0.188192		-0.284831	-0.562395	-0.562395	-0.189209	-0.563188	-0.393338		-0.508626	-0.508626	-0.247531	-1.297	-1.24023	-1.09938	-1.26638	-1.18358		-0.768129	-0.613166		-0.226339	-0.0971014	-6.8842	-5.20594	-12.8498	-9.02961	0.296021	-0.900705	-0.330308	-1.27908	-1.30594	-1.24068	-0.491158	-0.606129	-0.442887		131.567	135.059	200.484	145.767	122.22	148.222	119.282
						-0.188192		-0.276693	-0.547863	-0.514439	-0.199382	-0.664451	-0.454373		-0.35731	-0.35731	-0.237359	-1.16984	-1.23047	-1.05013	-1.27178	-1.27528		-0.760241	-0.573195		-0.236511	-0.124845	-4.86862	-4.81101	-13.0135	-8.58082	0.366211	-0.921631	-0.404807	-1.33793	-1.33528	-1.19569	-0.525667	-0.595926	-0.383634		127.808	131.569	183.389	168.386	85.8595	148.854	128.524
						-0.178019		-0.2889	-0.595819	-0.488281	-0.244141	-0.554172	-0.445331		-0.670115	-0.670115	-0.183105	-1.26648	-1.34766	-1.19822	-1.21587	-1.20853		-0.820861	-0.567046		-0.193278	-0.135942	-5.29445	-9.27495	-12.7776	-9.78358	0.311279	-0.990513	-0.417373	-1.26852	-1.31106	-1.16072	-0.484686	-0.624976	-0.398885		133.446	143.086	174.064	165.035	161.025	142.31	121.797
						-0.167847		-0.286865	-0.534784	-0.50136	-0.292969	-0.568737	-0.567401		-0.504812	-0.504812	-0.135634	-1.297	-1.23901	-1.10824	-1.22346	-1.13504		-0.895804	-0.52966		-0.0483195	-0.141491	-6.50095	-5.46923	-12.8143	-12.4943	0.238037	-0.897217	-0.445198	-1.24782	-1.3756	-1.22298	-0.439484	-0.601785	-0.394524		132.507	128.428	178.726	210.273	121.303	143.198	114.391
						-0.249227		-0.37028	-0.563849	-0.466483	-0.18514	-0.681097	-0.665735		-0.573476	-0.573476	-0.142415	-1.27157	-1.20239	-1.0683	-1.21819	-1.11419		-0.884076	-0.597181		-0.0940959	-0.0665838	-6.99775	-6.16335	-12.5059	-9.49635	0.210571	-0.893729	-0.412885	-1.35729	-1.43477	-1.27169	-0.502003	-0.634276	-0.369913		171.037	135.408	166.293	246.714	137.803	142.582	112.289
						-0.188192		-0.425212	-0.563849	-0.544957	-0.160726	-0.663757	-0.467936		-0.595093	-0.595093	-0.176324	-1.20036	-1.19629	-1.13195	-1.23435	-1.11242		-0.850339	-0.532964		-0.0991821	-0.0305176	-5.3938	-3.5185	-13.9784	-8.58082	0.216675	-0.875419	-0.324025	-1.25605	-1.3851	-1.32731	-0.475492	-0.60743	-0.410863		196.41	135.408	194.268	173.412	142.997	144.472	112.11
						-0.264486		-0.356038	-0.592913	-0.518799	-0.252279	-0.63324	-0.438549		-0.253042	-0.253042	-0.203451	-1.31734	-1.12061	-1.15861	-1.24848	-1.19153		-0.837676	-0.586442		-0.101725	-0.127619	-6.69967	-12.6379	-12.8443	-7.84481	0.253296	-0.902448	-0.301585	-1.278	-1.39058	-1.28789	-0.48611	-0.604248	-0.464692		164.458	142.388	184.943	162.521	60.8045	146.127	120.084
						-0.172933		-0.321452	-0.636509	-0.514439	-0.26652	-0.676242	-0.497323		-0.569661	-0.569661	-0.230577	-1.21562	-1.23535	-1.13528	-1.27684	-1.1562		-0.808509	-0.602473		-0.0915527	-0.155362	-6.6287	-9.72972	-13.7328	-10.1606	0.289917	-0.966971	-0.320435	-1.3998	-1.32871	-1.2085	-0.498393	-0.630406	-0.445907		148.483	152.858	183.389	184.303	136.886	149.446	116.523
						-0.172933		-0.278727	-0.531878	-0.50136	-0.18514	-0.642256	-0.397859		-0.212351	-0.212351	-0.203451	-1.34786	-1.25	-1.19753	-1.2298	-1.11272		-0.837261	-0.546976		-0.119527	-0.0332919	-7.21066	-3.49456	-13.8065	-11.4531	0.271606	-0.95738	-0.333898	-1.31937	-1.29869	-1.16244	-0.441625	-0.620386	-0.487347		128.747	127.73	178.726	147.442	51.0268	143.941	112.141
						-0.147502		-0.349935	-0.572568	-0.414167	-0.177002	-0.63532	-0.378644		-0.550588	-0.550588	-0.128852	-1.32243	-1.29761	-1.20334	-1.23875	-1.11375		-0.849405	-0.532964		-0.193278	-0.0110973	-7.43777	-11.7283	-12.4616	-6.89338	0.262451	-0.96174	-0.337489	-1.47965	-1.34534	-1.18948	-0.464356	-0.610046	-0.510676		161.639	137.502	147.643	140.321	132.303	144.988	112.245
						-0.233968		-0.313314	-0.524612	-0.392369	-0.20752	-0.663757	-0.456633		-0.521342	-0.521342	-0.125461	-1.3326	-1.2146	-1.16854	-1.29442	-1.14553		-0.790654	-0.549485		-0.384013	-0.0194203	-6.89839	-5.94794	-12.9979	-6.94724	0.228882	-0.975691	-0.298893	-1.35795	-1.33942	-1.22543	-0.478461	-0.635882	-0.508872		144.723	125.985	139.873	169.223	125.276	151.503	115.448
						-0.203451		-0.368245	-0.50136	-0.50136	-0.284831	-0.706759	-0.463415		-0.712077	-0.712077	-0.15937	-1.24105	-1.18774	-1.19949	-1.18254	-1.14293		-0.872865	-0.621748		-0.488281	-0.0138716	-7.50874	-5.60087	-13.1294	-7.71915	0.314331	-0.885882	-0.348259	-1.31761	-1.39087	-1.27501	-0.496925	-0.624257	-0.459615		170.097	120.402	178.726	171.737	171.108	138.408	115.186
						-0.178019		-0.390625	-0.483922	-0.462123	-0.221761	-0.660983	-0.578704		-0.324249	-0.324249	-0.203451	-1.24105	-1.21094	-1.20034	-1.2526	-1.11228		-0.908054	-0.607261		-0.470479	0.00554865	-7.79263	-6.55829	-13.3656	-10.4478	0.341797	-0.864083	-0.437119	-1.35255	-1.43569	-1.29079	-0.471455	-0.613013	-0.394495		180.434	116.214	164.739	214.461	77.9152	146.608	112.097
						-0.142415		-0.282796	-0.574021	-0.536237	-0.142415	-0.669306	-0.478109		-0.56839	-0.56839	-0.230577	-1.32243	-1.15845	-1.18933	-1.16814	-1.06853		-0.824079	-0.573792		-0.612895	0.0638095	-7.48036	-8.93986	-12.6399	-10.4478	0.32959	-0.912912	-0.413782	-1.34778	-1.36713	-1.19367	-0.480251	-0.608286	-0.407679		130.627	137.851	191.159	177.182	136.581	136.724	107.687
						-0.208537		-0.323486	-0.646682	-0.440325	-0.191243	-0.648499	-0.474718		-0.443776	-0.443776	-0.233968	-1.20544	-1.18408	-1.2014	-1.21032	-1.21289		-0.79979	-0.531373		-0.528971	0.016646	-7.45197	-7.33619	-12.3673	-8.65263	0.268555	-0.955636	-0.394036	-1.28246	-1.42486	-1.28826	-0.502156	-0.618276	-0.427246		149.422	155.301	156.968	175.925	106.637	141.66	122.236
						-0.208537		-0.297038	-0.595819	-0.483922	-0.166829	-0.587463	-0.332303		-0.500997	-0.500997	-0.108507	-1.30208	-1.21338	-1.17527	-1.2505	-1.24446		-0.84515	-0.525086		-0.518799	0.0277433	-7.02614	-11.9318	-12.1972	-11.4172	0.418091	-1.02539	-0.406602	-1.25375	-1.38245	-1.34612	-0.472479	-0.612325	-0.399041		137.205	143.086	172.51	123.148	120.387	146.363	125.418
						-0.198364		-0.264486	-0.544957	-0.592913	-0.150553	-0.583995	-0.376383		-0.436147	-0.436147	-0.108507	-1.39872	-1.19385	-1.26297	-1.26234	-1.2961		-0.946875	-0.558938		-0.554403	0.0138716	-6.04674	-10.2922	-12.0721	-11.9737	0.256348	-0.980922	-0.375187	-1.24926	-1.3475	-1.1401	-0.491356	-0.63963	-0.424857		122.169	130.871	211.363	139.484	104.804	147.749	130.623
						-0.233968		-0.317383	-0.571115	-0.562395	-0.177002	-0.669306	-0.421595		-0.500997	-0.500997	-0.128852	-1.25122	-1.19507	-1.3313	-1.2674	-1.15317		-0.949263	-0.538119		-0.709534	-0.0971014	-7.01195	-10.723	-12.3857	-9.49635	0.372314	-0.987898	-0.328513	-1.33447	-1.45455	-1.29401	-0.462123	-0.640334	-0.39924		146.603	137.153	200.484	156.238	120.387	148.342	116.217
						-0.203451		-0.39266	-0.547863	-0.449044	-0.152588	-0.666532	-0.438549		-0.386556	-0.386556	-0.183105	-1.30717	-1.27075	-1.28753	-1.2831	-1.18726		-0.921133	-0.605931		-0.790914	-0.138716	-6.57193	-3.57834	-12.3661	-7.62939	0.393677	-0.845773	-0.41827	-1.20625	-1.37592	-1.26866	-0.564522	-0.656702	-0.39757		181.374	131.569	160.076	162.521	92.8872	150.179	119.654
						-0.172933		-0.356038	-0.560942	-0.523158	-0.197347	-0.589544	-0.480369		-0.490824	-0.490824	-0.210232	-1.29191	-1.21704	-1.25526	-1.27173	-1.22873		-0.893936	-0.581731		-0.760396	-0.160911	-5.02475	-5.924	-13.544	-8.886	0.45166	-0.844029	-0.436222	-1.24591	-1.42616	-1.33256	-0.486507	-0.631263	-0.419151		164.458	134.71	186.497	178.02	117.942	148.848	123.833
						-0.178019		-0.376383	-0.568208	-0.558036	-0.246175	-0.683178	-0.495063		-0.474294	-0.474294	-0.196669	-1.23088	-1.2793	-1.26332	-1.21055	-1.25838		-0.892795	-0.590848		-0.928243	-0.152588	-6.69967	-9.94514	-13.9839	-11.5787	0.387573	-0.912912	-0.429939	-1.22144	-1.40101	-1.35509	-0.501971	-0.634521	-0.446566		173.856	136.455	198.93	183.465	113.97	141.687	126.821
						-0.239054		-0.317383	-0.571115	-0.440325	-0.2889	-0.677629	-0.492802		-0.305176	-0.305176	-0.132243	-1.26139	-1.18896	-1.23166	-1.22317	-1.18463		-0.881377	-0.563466		-0.905355	0.0305176	-9.0985	-13.5594	-13.1157	-10.6632	0.296021	-0.977434	-0.401216	-1.21171	-1.38661	-1.30331	-0.459753	-0.734808	-0.570426		146.603	137.153	156.968	182.627	73.332	143.164	119.389
						-0.233968		-0.297038	-0.613258	-0.38365	-0.223796	-0.604109	-0.440809		-0.443776	-0.443776	-0.0881619	-1.26139	-1.19629	-1.20294	-1.16808	-1.1882		-0.821276	-0.49466		-1.09609	0.00277433	-7.28164	-7.75505	-12.751	-8.77829	0.378418	-0.998361	-0.347362	-1.30058	-1.39084	-1.20853	-0.467401	-0.632012	-0.558097		137.205	147.274	136.764	163.359	106.637	136.716	119.748
						-0.254313		-0.372314	-0.568208	-0.50572	-0.113932	-0.590238	-0.36395		-0.528971	-0.528971	-0.118679	-1.30208	-1.23047	-1.22505	-1.2453	-1.24064		-0.878677	-0.540597		-1.0554	-0.0693581	-7.69327	-12.1592	-12.3655	-9.92719	0.50354	-0.95738	-0.352747	-1.2868	-1.36555	-1.19328	-0.525974	-0.615537	-0.571925		171.977	136.455	180.28	134.876	127.109	145.754	125.033
						-0.152588		-0.327555	-0.489734	-0.405448	-0.205485	-0.651966	-0.457764		-0.382741	-0.382741	-0.213623	-1.4801	-1.26953	-1.23187	-1.22422	-1.21237		-0.84598	-0.616409		-0.933329	-0.147039	-7.57971	-14.0142	-12.1697	-10.1785	0.393677	-0.878034	-0.360825	-1.19387	-1.34299	-1.32145	-0.476854	-0.605808	-0.618487		151.302	117.61	144.535	169.642	91.9705	143.287	122.184
						-0.147502		-0.376383	-0.54641	-0.492641	-0.16276	-0.678323	-0.496193		-0.405629	-0.405629	-0.213623	-1.21562	-1.26709	-1.19045	-1.26176	-1.26165		-0.884698	-0.583046		-0.928243	-0.0388406	-6.81323	-10.364	-13.1588	-10.9325	0.299072	-0.804792	-0.356338	-1.15453	-1.29046	-1.23013	-0.515465	-0.627408	-0.581835		173.856	131.22	175.618	183.884	97.4704	147.681	127.151
						-0.16276		-0.274658	-0.563849	-0.453404	-0.217692	-0.629078	-0.545926		-0.670115	-0.670115	-0.210232	-1.48519	-1.25977	-1.40252	-1.30081	-1.24911		-0.838195	-0.580232		-0.996908	0.0360662	-5.29445	-6.85748	-12.546	-7.37807	0.354004	-0.851004	-0.458661	-1.24539	-1.27617	-1.35053	-0.520787	-0.626612			126.868	135.408	161.631	202.314	161.025	152.252	125.887
						-0.254313		-0.341797	-0.619071	-0.466483	-0.229899	-0.683178	-0.504105		-0.541687	-0.541687	-0.152588	-1.30717	-1.25488	-1.2739	-1.24662	-1.25136		-0.869544	-0.583337		-0.882467	-0.0416149	-7.22486	-6.90535	-13.2384	-7.7371	0.326538	-0.878906	-0.482896	-1.27447	-1.34489	-1.27368	-0.493911	-0.629504			157.88	148.67	166.293	186.816	130.164	145.908	126.113
						-0.183105		-0.378418	-0.624884	-0.401088	-0.301107	-0.645031	-0.547056		-0.387828	-0.387828	-0.139025	-1.26139	-1.19995	-1.25454	-1.25459	-1.21094		-0.868298	-0.523388		-0.826518	-0.105424	-5.79124	-7.02503	-12.4882	-9.90924	0.338745	-0.978306	-0.452378	-1.21864	-1.43194	-1.28596	-0.504298	-0.631813			174.796	150.066	142.981	202.733	93.1927	146.841	122.04
						-0.178019		-0.317383	-0.536237	-0.553676	-0.260417	-0.665838	-0.507496		-0.631968	-0.631968	-0.155979	-1.34786	-1.27197	-1.11666	-1.26728	-1.18026		-0.839026	-0.540276		-0.951131	-0.110973	-7.39519	-12.207	-13.8888	-9.13732	0.366211	-0.952148	-0.442505	-1.17769	-1.38089	-1.17827	-0.482821	-0.597961			146.603	128.777	197.376	188.073	151.858	148.327	118.948
						-0.203451		-0.349935	-0.559489	-0.553676	-0.187174	-0.598561	-0.450982		-0.55186	-0.55186	-0.16276	-1.40381	-1.24878	-1.22436	-1.20118	-1.27925		-0.874838	-0.541806		-1.11898	0.0249689	-7.66488	-9.04756	-11.9712	-8.50902	0.411987	-0.955636	-0.456866	-1.23909	-1.36936	-1.31031	-0.512802	-0.64012			161.639	134.361	197.376	167.129	132.609	140.591	128.924
						-0.213623		-0.315348	-0.614711	-0.470843	-0.164795	-0.561801	-0.428376		-0.460307	-0.460307	-0.213623	-1.25631	-1.33301	-1.20528	-1.25601	-1.27082		-0.898712	-0.601036		-0.943502	-0.00832298	-7.21066	-8.76034	-12.0082	-7.21651	0.473022	-0.860596	-0.389548	-1.24079	-1.35648	-1.27033	-0.534953	-0.653398			145.663	147.623	167.847	158.752	110.609	147.008	128.074
						-0.254313		-0.386556	-0.534784	-0.553676	-0.170898	-0.704679	-0.486021		-0.317891	-0.317891	-0.213623	-1.37329	-1.27563	-1.17616	-1.34271	-1.2129		-0.940544	-0.56085		-1.02234	-0.116522	-7.13969	-6.52238	-12.2881	-8.59878	0.415039	-0.852748	-0.393138	-1.19664	-1.33636	-1.31917	-0.532184	-0.682645			178.555	128.428	197.376	180.114	76.3875	157.156	122.238
						-0.228882		-0.311279	-0.59146	-0.449044	-0.195312	-0.619368	-0.437419		-0.347137	-0.347137	-0.264486	-1.38855	-1.26953	-1.23386	-1.21611	-1.20995		-0.953414	-0.604722		-1.07829	-0.141491	-6.10352	-7.06093	-12.7886	-10.1067	0.326538	-0.877162	-0.390445	-1.25806	-1.36531	-1.22104	-0.566006	-0.638774			143.784	142.039	160.076	162.103	83.4151	142.338	121.94
						-0.157674		-0.360107	-0.566755	-0.575474	-0.231934	-0.621449	-0.517669		-0.593821	-0.593821	-0.166151	-1.31734	-1.20483	-1.03978	-1.24853	-1.16839		-0.943865	-0.607659		-0.974019	-0.0804554	-6.98356	-9.72972	-12.4426	-7.89867	0.38147	-0.937326	-0.487384	-1.21794	-1.32445	-1.24466	-0.541133	-0.622176			166.338	136.106	205.146	191.842	142.692	146.132	117.751
						-0.147502		-0.341797	-0.50136	-0.51008	-0.272624	-0.649886	-0.475848		-0.490824	-0.490824	-0.128852	-1.3326	-1.24023	-0.924744	-1.24651	-1.30562		-0.930993	-0.566847		-0.831604	-0.0915527	-6.33062	-11.2496	-12.3774	-9.58611	0.338745	-0.93035	-0.396729	-1.24447	-1.38097	-1.24042	-0.533209	-0.645596			157.88	120.402	181.834	176.344	117.942	145.896	131.581
						-0.152588		-0.30721	-0.521705	-0.449044	-0.256348	-0.586076	-0.465676		-0.400543	-0.400543	-0.0881619	-1.20544	-1.26465	-0.973779	-1.24302	-1.28393		-0.832176	-0.577188		-0.890096	-0.0138716	-6.51515	-9.8494	-12.3211	-10.1785	0.341797	-0.928606	-0.425451	-1.21221	-1.35385	-1.24522	-0.516612	-0.66718			141.904	125.287	160.076	172.574	96.2482	145.488	129.395
						-0.249227		-0.303141	-0.507173	-0.483922	-0.246175	-0.565962	-0.454373		-0.535329	-0.535329	-0.139025	-1.40381	-1.33911	-0.811263	-1.23429	-1.22782		-0.850651	-0.553661		-0.897725	0.0582608	-6.57193	-10.5196	-12.5732	-8.9219	0.326538	-0.976562	-0.38865	-1.21462	-1.38707	-1.27164	-0.519151				140.025	121.798	172.51	168.386	128.637	144.465	123.741
						-0.178019		-0.290934	-0.579834	-0.544957	-0.193278							-1.46484	-1.33789	-0.773341	-1.26332	-1.23152		-0.830619	-0.535947		-0.976562	-0.0110973		-4.2964	-13.2518	-10.0169	0.332642	-0.969587	-0.404807	-1.3204	-1.38795	-1.32021	-0.530287				134.386	139.247	194.268	0	0	147.863	124.114
						-0.152588		-0.372314			-0.26652							-1.32243	-1.28296	-0.937845	-1.31632	-1.19901		-0.933173			-0.907898	-0.16646		-6.12745	-12.204	-10.4119	0.360107	-0.859724	-0.326718	-1.28741	-1.33317	-1.2193	-0.54231				171.977	0	0	0	0	154.067	120.838
						-0.172933		-0.341797			-0.258382							-1.35295	-1.23779	-0.703832	-1.26705	-1.2312		-0.963795			-0.991821	-0.172008			-12.7455	-9.49635	0.408936	-0.90332	-0.343772	-1.28694	-1.28703	-1.2945	-0.53281				157.88	0	0	0	0	148.3	124.081
						-0.213623		-0.233968			-0.274658							-1.34786	-1.20972	-0.880099		-1.18717		-0.959331			-0.869751	-0.0804554			-11.6701	-10.2683	0.393677	-0.861468		-1.26892	-1.27765	-1.18436	-0.579528				108.073	0	0	0	0		119.644
						-0.208537		-0.301107			-0.254313							-1.44958	-1.26709	-0.626368		-1.16998					-0.986735	-0.0332919			-12.2933	-10.7709	0.454712	-0.844901		-1.24619	-1.349	-1.27216	-0.530393				139.085	0	0	0	0		117.912
						-0.183105		-0.32959			-0.146484							-1.37838	-1.3269	-0.562197		-1.21022					-0.984192	-0.0221946			-11.9993		0.427246	-0.901576		-1.30026	-1.42596	-1.28296	-0.619255				152.242	0	0	0	0		121.968
						-0.223796		-0.351969			-0.152588							-1.35295	-1.3147			-1.23565					-0.938416	0.0416149			-11.8479		0.405884	-0.921631		-1.29301	-1.33627	-1.30638	-0.558892				162.579	0	0	0	0		124.53
						-0.208537		-0.343831			-0.179036							-1.50553	-1.27441								-0.910441	-0.0277433			-12.8523		0.396729	-0.979178		-1.21786	-1.35628	-1.21722	-0.540735				158.82	0	0	0	0
						-0.183105		-0.333659			-0.195312							-1.3682	-1.29883								-0.869751	-0.113747			-12.1465		0.396729	-0.946917		-1.21943	-1.28155	-1.25879	-0.516643				154.121	0	0	0	0
						-0.178019		-0.380452			-0.199382								-1.30249								-0.907898	-0.119296			-12.3211		0.335693			-1.30084		-1.26092	-0.531175				175.736	0	0	0	0
						-0.137329		-0.335693			-0.274658								-1.23169								-0.930786	-0.124845			-12.2933		0.375366			-1.29624		-1.28706	-0.534508				155.061	0	0	0	0
						-0.259399		-0.39266			-0.227865								-1.31348								-0.857035	-0.130393			-12.4423		0.384521			-1.24343		-1.22315	-0.562273				181.374	0	0	0	0
						-0.228882		-0.339762			-0.195312								-1.25854								-0.816345	-0.0915527			-12.2012		0.476074			-1.25584		-1.27322	-0.582955				156.94	0	0	0	0
						-0.213623		-0.32959			-0.26652								-1.20728								-0.851949	-0.119296			-12.419		0.393677			-1.33208		-1.32269	-0.585556				152.242	0	0	0	0
						-0.233968		-0.282796			-0.172933								-1.1084								-0.745138	-0.124845			-13.3372		0.506592			-1.25829		-1.27761	-0.56495				130.627	0	0	0	0
						-0.178019		-0.305176			-0.20752								-0.163574								-0.750224	-0.144265			-12.9037		0.476074			-1.21203		-1.21917	-0.600408				140.964	0	0	0	0
						-0.193278		-0.321452			-0.170898								-0.141602								-0.895182	0.0110973			-14.5872		0.421143			-1.26265		-1.31558	-0.54566				148.483	0	0	0	0
						-0.172933		-0.386556			-0.189209								-55.2454								-0.872294	0.0665838			-12.7225		0.39978			-1.25641		-1.24668	-0.530929				178.555	0	0	0	0
						-0.147502		-0.32959			-0.274658								0								-0.796	-0.016646			-13.0224		0.497437					-1.22618	-0.551856				152.242	0	0	0	0
						-0.183105					-0.254313								-1.11084									-0.0582608			-11.7729		0.387573						-0.541943				0	0	0	0	0
						-0.203451					-0.244141								0									0.0249689			-12.3808		0.454712						-0.546914				0	0	0	0	0
						-0.203451					-0.168864								-9.39819									-0.0277433			-13.2763								-0.572568				0	0	0	0	0
						-0.218709					-0.16276								-7.50977									-0.0138716			-12.7079								-0.540138				0	0	0	0	0
						-0.203451					-0.177002																	-0.0693581			-12.0577								-0.530104				0	0	0	0	0
						-0.188192					-0.221761																	-0.0582608			-12.9495								-0.520788				0	0	0	0	0
						-0.249227					-0.22583																	-0.119296			-11.9179								-0.560744				0	0	0	0	0
						-0.223796					-0.236003																	-0.0776811			-12.3095								-0.585509				0	0	0	0	0
						-0.188192																						-0.0721325			-11.8708								-0.564858				0	0	0	0	0
						-0.213623																						-0.0887784			-13.3014								-0.562977				0	0	0	0	0
						-0.183105																						-0.0527122			-12.5353								-0.572966				0	0	0	0	0
						-0.16276																						0.0221946											-0.589227				0	0	0	0	0
						-0.254313																						0.0471635											-0.581839				0	0	0	0	0
						-0.16276																						-0.0305176											-0.61953				0	0	0	0	0
						-0.193278																						0.0721325											-0.556445				0	0	0	0	0
						-0.198364																						-0.0721325											-0.564629				0	0	0	0	0
						-0.213623																						0.016646											-0.568912				0	0	0	0	0
						-0.310262																						-0.0221946											-0.560268				0	0	0	0	0
						-0.172933																						0.00277433											-0.65511				0	0	0	0	0
						-0.198364																						-0.016646											-0.659807				0	0	0	0	0
						-0.178019																						-0.147039											-0.586809				0	0	0	0	0
						-0.320435																						-0.0943271											-0.57064				0	0	0	0	0
						-0.157674																						-0.0776811											-0.585586				0	0	0	0	0
						-0.193278																						0.0832298											-0.586428				0	0	0	0	0
						-0.208537																						0.0443892											-0.590191				0	0	0	0	0
						-0.178019																						0.0638095											-0.617725				0	0	0	0	0
						-0.218709																						-0.0582608											-0.638237				0	0	0	0	0
						-0.223796																						-0.0443892											-0.604539				0	0	0	0	0
						-0.223796																						-0.0443892											-0.642614				0	0	0	0	0
						-0.167847																						-0.00832298											-0.569095				0	0	0	0	0
																												0.0915527											-0.561065				0	0	0	0	0
																												-0.00277433											-0.607185				0	0	0	0	0
																												-0.152588											-0.625756				0	0	0	0	0
																												-0.10265											-0.620509				0	0	0	0	0
																												0.0915527											-0.621473				0	0	0	0	0
																												-0.0277433											-0.633221				0	0	0	0	0
																												-0.0360662											-0.676817				0	0	0	0	0
																												-0.0360662											-0.635346				0	0	0	0	0
																												-0.0693581											-0.619101				0	0	0	0	0
																												-0.0943271											-0.608546				0	0	0	0	0
																												0.0138716											-0.617189				0	0	0	0	0
																												0.163685											-0.637916				0	0	0	0	0
																												0.00832298											-0.682844				0	0	0	0	0
																												-0.0665838											-0.600684				0	0	0	0	0
																												-0.0443892											-0.664166				0	0	0	0	0
																												0.0721325											-0.674339				0	0	0	0	0
																												0.180331											-0.63137				0	0	0	0	0
																												-0.00277433											-0.649756				0	0	0	0	0
																												-0.0638095											-0.653627				0	0	0	0	0
																												-0.0998757											-0.653612				0	0	0	0	0
																																											0	0	0	0	0
																																											0	0	0	0	0
																																											0	0	0	0	0
[truncated: 63 more columns]

## Sheet: NMDA IO (E)
Group	KO	KO	KO	KO	KO	KO	KO	KO	KO	KO	KO	KO	KO	KO	KO	KO	KO	KO	KO	KO	KO	KO	KO	KO	KO	KO	KO	KO	KO	KO	KO	KO	KO	KO	KO	KO	KO	KO	KO	KO	KO	KO	KO	KO	KO	KO	KO	KO	KO
Animal #	F190	F190	F190	F190	F190	F190	F190	F190	F190	F190	F190	F190	F190	F190	M204	M204	M204	M204	M204	M204	M204	M204	M204	M204	M204	M204	M204	M204	M204	M204	M204	M204	M204	M204	M204	M204	M204	M204	M204	M204	M204	M204	F206	F206	F206	F206	F206	F206	F206
Neuron #	cell 4	cell 4	cell 4	cell 4	cell 4	cell 4	cell 4	cell 5	cell 5	cell 5	cell 5	cell 5	cell 5	cell 5	cell 1	cell 1	cell 1	cell 1	cell 1	cell 1	cell 1	cell 2	cell 2	cell 2	cell 2	cell 2	cell 2	cell 2	cell 3	cell 3	cell 3	cell 3	cell 3	cell 3	cell 3	cell 4	cell 4	cell 4	cell 4	cell 4	cell 4	cell 4	cell 1	cell 1	cell 1	cell 1	cell 1	cell 1	cell 1
File #	23o12048	23o12049	23o12050	23o12051	23o12052	23o12053	23o12054	23o12057	23o12058	23o12059	23o12060	23o12061	23o12062	23o12063	23n01002	23n01003	23n01004	23n01005	23n01006	23n01007	23n01008	23n01016	23n01017	23n01018	23n01019	23n01020	23n01021	23n01022	23n01024	23n01025	23n01026	23n01027	23n01028	23n01029	23n01030	23n01032	23n01033	23n01034	23n01035	23n01036	23n01037	23n01038	23n04001	23n04002	23n04003	23n04004	23n04005	23n04006	23n04007
Stimulation	0.2	0.4	0.6	0.9	1.7	2.4	3.2	0.2	0.4	0.6	0.9	1.7	2.4	3.2	0.2	0.4	0.6	0.9	1.7	2.4	3.2	0.2	0.4	0.6	0.9	1.7	2.4	3.2	0.2	0.4	0.6	0.9	1.7	2.4	3.2	0.2	0.4	0.6	0.9	1.7	2.4	3.2	0.2	0.4	0.6	0.9	1.7	2.4	3.2
Good trace?																																														no
Average	-19.0853	-16.0263	-20.9284	-25.3489	-48.3091	-73.4068	-102.83	-22.0172	-24.6032	-30.0888	-62.237	-172.471	-391.688	-1598.97	-28.3067	-57.6999	-122.764	-370.416	-1230.48	-1452.01	-1465.3	-50.4668	-114.347	-97.5488	-91.0834	-199.075	-599.853	-642.925	-34.9005	-99.7821	-234.52	-432.792	-1721.4	-2102.73	-2054.34	-35.488	-69.1055	-141.185	-305.281	-1175.38	-1337.55	-1409.82	-45.0242	-65.417	-66.3902	-93.4	-223.307	-305.337	-169.846
Data	-18.9848	-14.4672	-22.6481	-20.3456	-46.5645	-66.4115	-100.479	-18.462	-22.6127	-26.3206	-44.8062	-149.025	-340.737	-810.463	-26.8344	-52.625	-120.377	-308.916	-1038.48	-1452.01	-1498.47	-46.7441	-130.099	-110.443	-100.895	-156.316	-564.859	-619.451	-34.9725	-88.3597	-230.887	-413.836	-1677.77	-2108.86	-2068.78	-39.0499	-70.9707	-183.848	-228.639	-1147.63	-1332.82	-1418.26	-58.4929	-68.7613	-70.5273	-79.9271	-251.227	-301.317	-148.397
	-18.555	-18.225	-17.0873	-21.9657	-46.0934	-76.3208	-105.073	-26.1791	-23.6638	-26.4011	-69.0944	-172.099	-391.213	-1961.05	-32.2756	-65.3802	-125.085	-388.736	-1249.36	-1461.8	-1459.54	-52.0059	-119.447	-89.206	-88.6995	-193.713	-603.733	-628.602	-36.2602	-112.627	-231.831	-400.772	-1641.59	-2102.31	-2051.45	-33.8413	-67.8619	-110.823	-331.394	-1153.89	-1328.15	-1414.87	-37.9064	-66.1241	-69.0792	-108.983	-191.192	-336.246	-178.02
	-19.7162	-15.3866	-23.0497	-33.7355	-52.2696	-77.4882	-102.937	-21.4106	-27.5331	-37.5447	-72.8105	-196.29	-443.114	-2025.41	-25.8103	-55.0944	-122.829	-413.596	-1403.59	-1442.22	-1437.9	-52.6505	-93.4951	-92.9977	-83.6554	-247.196	-630.966	-680.72	-33.4687	-98.3591	-240.841	-483.767	-1844.82	-2097.03	-2042.79	-33.5726	-68.484	-128.885	-355.809	-1224.63	-1351.67	-1396.34	-38.6733	-61.3655	-59.5641	-91.2895	-227.502	-278.447	-183.121
	KO	11, 4							Ctrl	14, 4
	-19.0853	-16.0263	-20.9284	-25.3489	-48.3091	-73.4068	-102.83		-13.0054	-14.7201	-14.7996	-34.8436	-114.96	-380.34	-2662.26
	-22.0172	-24.6032	-30.0888	-62.237	-172.471	-391.688	-1598.97		-25.1625	-19.4468	-19.7512	-46.3329	-216.042	-267.214	-374.518
	-28.3067	-57.6999	-122.764	-370.416	-1230.48	-1452.01	-1465.3		-20.1993	-48.3913	-230.014	-231.757	-277.785	-247.841	-170.319
	-50.4668	-114.347	-97.5488	-91.0834	-199.075	-599.853	-642.925		-64.0348	-120.023	-158.423	-136.108	-183.134	-132.965	-261.58
	-34.9005	-99.7821	-234.52	-432.792	-1721.4	-2102.73	-2054.34		-143.2	-1451.81	-927.067	-633.809	-907.493	-1332.85	-1718.02
	-35.488	-69.1055	-141.185	-305.281	-1175.38	-1337.55	-1409.82		-21.2238	-16.9739	-16.1548	-31.4295	-70.2956	-217.55	-1377.07
	-45.0242	-65.417	-66.3902	-93.4	-223.307	-305.337	-169.846		-25.8456	-29.9756	-41.191	-37.0355	-44.5155	-52.7792	-70.2887
	-51.6409	-51.9857	-89.4408	-180.656	-628.591	-880.177	-944.313		-27.9332	-1065.23	-1277.61	-1192.91	-1305.1	-1417.33	-1536.31
*	-17.7729	-22.0122	-25.3489	-34.4261	-91.8319	-273.434	-365.941		-29.7052	-44.1888	-42.7647	-78.988	-265.104	-1036.36	-1164.76
								*	-81.9031	-155.986	-404.614	-570.226	-808.059	-948.959	-965.459
	-26.4193	-53.5578	-104.256	-182.908	-328.096	-693.173			-85.2738	-501.258	-935.069	-1304.02	-1385.47	-1476.59	-1591.68
	-9.47153	-77.9626	-717.528	-883.364	-1038.93	-1116.61	-1149.74		-1004.95	-1004.51	-1157.64	-1497.63	-1587.66	-1695.84	-1811.53
									-116.767	-382.944	-372.153	-476.935	-734.854	-790.057	-783.149
	Ctrl	0.17686	0.414721	0.485876	0.557019	0.685468	0.841303	1.16343	-816.842	-950.633	-1205.01	-1526.24	-1696.08	-1781.57	-1801.06
		0.0843675	0.132392	0.13338	0.155319	0.160807	0.166583	0.203668
	KO	0.030963	0.0593181	0.15	0.241992	0.623443	0.838724	0.990403
		0.00418476	0.00939377	0.059706	0.0764376	0.173086	0.185115	0.208249
[truncated: 133 more columns]

## Sheet: iNMDA (F)
Objective is to see the current induced in a neuron after NMDA application.
How much NMDA is applied: 20 uM concentration for 30 s
For eg if NMDA is applied at sweep x, then sweep 1 to x can serve as baseline, whereas the peak current is to be visually identified, typically sometime after sweep x
Submit report in Summary sheet
Group			KO	KO	KO	KO	KO	KO	KO	KO	KO	KO	KO	KO	KO	KO	KO	KO		control	control	control	control	control	control	control	control	control	control	control	control	control	control
Animal #			F190	F190	M204	M204	M204	M204	F206	F206	F206	F206	M196	F206	F190	F190	F206	F206		M203	M203	M205	M205	M205	M205	M205	M194	M194	M194	M194	M194	F217	M194
Neuron #			cell 4	cell 5	cell 1	cell 2	cell 3	cell 4	cell 1	cell 2	cell 3	cell 4	cell 3	cell 6	cell 4	cell 5	cell 3	cell 3		cell 1	cell 3	cell 1	cell 2	cell 3	cell 4	cell 5	cell 1	cell 2	cell 3	cell 4	cell 6	cell 3	cell 6
File #			23o12056	23o12065	23n01009	23n01023	23n01031	23n01039	23n04008	23n04016	23n04024	23n04034	23n08038	23n04045	23o12055	23o12064	23n04025	23n04026		23o31034	23o31045	23n03009	23n03017	23n03025	23n03034	23n03042	23n07007	23n07016	23n07024	23n07032	23n07048	23o12058	23n07049
NMDA sweep			30	30	12	18	12	12	27	12	27	20	27	20	30	30	27	27		5	21	27	12	20	18	18	28	15	15	15	15		15
Good trace?			no	yes	yes	yes	yes	yes	no	no	no	no	yes	no	no	yes	no	no		yes	no	yes	no	yes	no	no	yes	yes	no	no	no	Yes	no
Baseline			-276.969	-100.39	-281.262	26.8576	-289.857	-36.7043	-180.222	-216.685	-46.8343	-41.2491	-68.5312		-238.428	-36.9899				-39.0541	-239.518	-364.278	-83.1612	-46.9705	-412.923	-32.7682	-45.3063	-176.801	-85.8496	-142.493	-128.01	-58.312
Peak			-722.88	-196.737	-429.35	-89.7913	-516.252	-167.498	-367.288	-485.265	-91.1006	-947.803	-176.294		-274.896	-561.294				-103.205	-483.506	-1063.74	-775.174	-853.267	-958.75	-1274.54	-968.124	-782.09	-896.737	-581.576	-1191.72	-177.032
NMDA current			445.911	96.3469	148.088	116.649	226.395	130.794	187.065	268.58	44.2663	906.554	107.762		36.4681	524.304				64.1508	243.988	699.465	692.013	806.297	545.827	1241.77	922.818	605.29	810.888	439.083	1063.71	118.72	0
Data
Summarized NMDA current		1	-278.128	-95.1169	-277.045	28.9406	-292.967	-60.5473	-469.022	-136.675	-36.3381	-47.2316	-64.3016	-1737.35	-205.54	-31.9205	-130.665	-133.92		-39.1111	-232.157	-363.193	-83.0285	-37.7287	-453.08	-27.3216	-47.4366	-174.074	-86.4653	-119.523	-149.898	-61.0262	-1382.3		-37.9666	-37.7287
Control (13, 4)	Control (13, 4) (nA)	2	-273.012	-96.9539	-274.573	31.0313	-289.879	-59.8766	-462.99	-209.61	-37.0166	-41.8723	-66.3588	-1699.72	-204.046	-32.9114	-133.976	-134.591		-38.9862	-232.727	-335.652	-80.251	-40.4876	-471.369	-31.7726	-48.1869	-172.002	-85.0823	-124.516	-145.642	-58.8634	-1377.88		-34.8792	-40.4876
64.1508	0.0641508	3	-275.34	-97.0857	-274.659	30.5817	-286.039	-56.4609	-432.653	-206.909	-38.9187	-37.4042	-67.6016	-1617.66	-209.705	-32.7567	-132.413	-136.152		-39.1542	-232.861	-339.127	-81.9617	-41.5667	-487.955	-25.9066	-48.243	-173.475	-86.2491	-126.286	-146.993	-59.5594	-1375.88		-31.0385	-41.5667
243.988	0.243988	4	-276.822	-95.9813	-300.138	33.0497	-285.952	-54.7894	-412.516	-196.8	-37.2314	-50.5526	-73.5989	-1561.73	-212.151	-32.1244	-129.973	-134.735		-39.2892	-233.633	-328.18	-81.2134	-39.636	-442.992	-35.4478	-47.1966	-173.517	-82.9635	-131.425	-135.47	-57.5952	-1370.3		-30.9523	-39.636
699.465	0.699465	5	-279.386	-97.5535	-298.79	33.3625	-285.783	-56.1926	-440.558	-224.47	-40.2616	-41.9871	-66.2566	-1539.78	-209.104	-34.7562	-123.841	-135.012		-38.7301	-233.627	-328.208	-83.4583	-40.9271	-448.688	-26.3422	-49.7802	-173.54	-84.899	-135.22	-138.168	-60.5536	-1354.01		-30.7826	-40.9271
692.013	0.692013	6	-277.745	-98.2876	-272.93	30.7227	-284.971	-53.6263	-415.775	-234.306	-42.1509	-48.034	-67.9068	-1572.77	-212.894	-34.6637	-128.021			-39.4546	-234.485	-325.936	-82.8888	-44.5735	-387.231	-33.7665	-47.8163	-174.607	-83.9619	-140.297	-133.181	-59.3015	-1327		-29.9706	-44.5735
806.297	0.806297	7	-279.827	-96.2888	-269.96	27.8722	-286.114	-54.8916	-388.14	-249.945	-43.2423	-43.881	-68.7649	-1543.34	-213.103	-33.4646	-129.055			-39.4602	-239.812	-322.094	-81.4842	-37.4308	-315.457	-29.5909	-46.5129	-173.243	-83.2729	-142.479	-133.009	-60.0904	-1309.22		-31.1141	-37.4308
545.827	0.545827	8	-276.978	-98.056	-270.727	29.2085	-294.486	-36.4808	-387.492	-244.066	-44.2912	-35.3375	-70.4031	-1520.97	-212.772	-35.1676	-130.515			-40.2217	-238.838	-321.371	-82.963	-41.1312	-319.236	-51.9974	-45.9451	-173.608	-84.1011	-145.914	-120.983	-61.4589	-1318.85		-39.4861	-41.1312
1241.77	1.24177	9	-276.112	-98.5237	-308.988	28.4787	-286.845	-35.6043	-389.057	-231.037	-45.5714	-41.6534	-69.5165	-1497.9	-216.272	-34.9913	-128.613			-41.3753	-239.306	-319.555	-85.7785	-39.2462	-318.397	-103.169	-45.1556	-175.701	-84.4584	-149.158	-112.842	-59.9047	-1302.29		-31.8447	-39.2462
922.818	0.922818	10	-276.557	-100.571	-266.519	26.1478	-297.736	-37.3669	-415.998	-233.033	-47.4973	-36.4089	-65.015	-1465.91	-216.304	-35.5802	-127.18			-40.5659	-243.269	-322.541	-83.8153	-42.0282	-317.391	-181.555	-44.9214	-178.605	-85.2667	-149.879	-115.583	-62.0623	-1278.98		-42.7356	-42.0282
605.29	0.60529	11	-276.751	-98.5072	-296.639	25.7964	-296.716	-36.6003	-436.711	-309.45	-47.3221	-34.0323	-70.1066	-1472.27	-211.172	-34.7451	-129.446			-41.2232	-242.241	-332.051	-84.9589	-46.6	-487.377	-312.177	-45.7632	-180.706	-87.5124	-151.1	-113.428	-62.4869	-1277.29		-41.7156	-46.6
810.888	0.810888	12	-270.883	-101.083	-264.173	23.58	-290.797	-37.4692	-448.028	-325.998	-44.9583	-35.7728	-67.7741	-1402.01	-223.31	-34.4244	-128.661			-43.3551	-239.656	-340.822	-86.1333	-43.3028	-414.959	-506.729	-45.6358	-178.836	-87.6954	-152.277	-124.969	-61.0545	-1268.8		-35.7971	-43.3028
439.083	0.439083	13	-273.097	-101.548	-259.701	22.951	-285.273	-39.0152	-425.002	-292.331	-43.8571	-42.0702	-73.3014	-1404.6	-219.979	-35.5552	-127.568			-49.173	-242.019	-349.661	-85.3486	-44.1044	-418.92	-684.627	-46.2368	-182.02	-90.1567	-153.982	-120.756	-64.0136	-1255.41		-30.2728	-44.1044
1063.71	1.06371	14	-271.632	-104.059	-257.182	22.2702	-285.356	-44.5754	-409.493	-373.567	-40.8803	-33.8282	-79.0605	-1399.99	-216.025	-35.4462	-127.163			-53.9041	-245.829	-351.039	-84.8329	-46.2016	-404.302	-942.981	-45.3272	-184.506	-88.2596	-155.213	-117.865	-61.2117	-1278.83		-30.3563	-46.2016
118.72	0.11872	15	-272.028	-101.03	-254.502	23.6092	-285.68	-48.7977	-416.019	-377.483	-40.441	-30.9492	-72.069	-1400.51	-216.169	-35.1136	-126.413			-62.0765	-239.85	-357.762	-83.6299	-49.8706	-412.533	-1181.56	-45.2981	-183.569	-87.3995	-160.127	-111.367	-59.3967	-1233.46		-30.6804	-49.8706
KO (11, 4)	KO (11, 4) (nA)	16	-274.058	-106.411	-270.087	22.5023	-284.801	-52.8409	-395.088	-363.066	-42.6716	-32.8077	-72.4621	-1370.73	-217.573	-35.7775	-121.986			-68.8747	-239.464	-363.062	-83.6814	-42.5434	-413.597	-1265.12	-45.188	-186.009	-89.721	-161.947	-110.003	-59.4457	-1235.03		-29.8005	-42.5434
445.911	0.445911	17	-276.377	-104.285	-275.271	22.0693	-283.876	-54.7488	-392.134	-370.727	-42.7283	-36.3472	-73.4111	-1389.21	-212.911	-35.4	-123.844			-76.2812	-240.453	-380.28	-87.2527	-51.08	-460.378	-1274.54	-45.2171	-187.097	-89.1539	-164.559	-119.904	-48.2147	-1233.89		-28.8763	-51.08
96.3469	0.0963469	18	-275.076	-104.755	-276.168	21.2623	-290.281	-59.9857	-389.236	-386.261	-41.9201	-38.5058	-73.1964	-1388.81	-219.071	-35.5285	-125.907			-83.0878	-239.799	-387.582	-87.6903	-56.4475	-458.752	-1263.31	-44.4013	-190.09	-123.162	-166.216	-117.223	-50.8197	-1202.88		-35.281	-56.4475
148.088	0.148088	19	-274.33	-104.464	-286.687	21.6199	-297.349	-66.2047	-387.911	-403.858	-42.7448	-47.0541	-80.0425	-1376.29	-217.613	-37.5883	-127.527			-90.683	-242.496	-391.087	-100.735	-71.0904	-449.296	-1260.69	-43.9242	-193.286	-186.732	-169.84	-116.067	-49.2029	-1153.42		-42.3494	-71.0904
116.649	0.116649	20	-274.827	-101.812	-295.342	21.0041	-301.032	-75.5906	-377.143	-435.72	-44.2922	-39.0564	-73.6345	-1363.57	-220.833	-38.4801	-126.045			-101.643	-246.786	-387.162	-117.963	-83.4129	-443.68	-1244.98	-43.462	-195.123	-277.663	-184.908	-115.667	-49.9771	-1101.39		-46.0322	-83.4129
226.395	0.226395	21	-274.554	-103.747	-304.894	20.7941	-305.289	-88.7702	-386.443	-485.265	-44.7014	-33.5404	-77.5695	-1369.26	-220.138	-39.4352	-128.66			-101.714	-250.564	-392.668	-145.915	-97.4849	-432.287	-1226.75	-43.2346	-193.194	-895.451	-212.867	-113.045	-51.9808	-1050.35		-50.2885	-97.4849
130.794	0.130794	22	-276.754	-103.096	-311.189	20.5599	-317.517	-105.825	-383.337	-436.132	-44.3915	-43.1365	-77.5408	-1388.07	-224.681	-39.1463	-128.767			-102.262	-249.416	-402.698	-179.503	-121.447	-439.597	-1220.31	-43.025	-194.04	-912.497	-243.293	-114.932	-54.4997	-987.862		-62.5168	-121.447
187.065	0.187065	23	-272.815	-101.482	-332.007	23.5962	-336.013	-130.842	-379.366	-422.823	-44.3073	-38.4714	-70.6382	-1404.54	-222.866	-38.5963	-131.322			-100.379	-250.671	-404.69	-212.47	-141.211	-457.52	-1229.36	-43.7743	-203.065	-896.737	-266.185	-115.825	-56.703	-934.365		-81.0125	-141.211
268.58	0.26858	24	-275.063	-100.495	-351.246	23.8582	-353.379	-150.478	-368.376	-402.916	-48.0027	-42.3459	-58.1666	-1409.77	-225.953	-39.6937	-130.24			-101.632	-250.344	-418.727	-332.341	-179.453	-448.312	-1369.7	-43.4335	-214.242	-864.798	-280.321	-118.573	-63.75	-879.906		-98.3787	-179.453
44.2663	0.0442663	25	-277.119	-100.256	-373.38	23.6185	-382.142	-165.291	-374.656	-350.778	-47.7895	-40.6748	-64.5396	-1439.04	-228.164	-40.2248	-131.242			-98.9348	-256.171	-424.465	-470.791	-221.337	-468.045	-1324.77	-43.1823	-234.369	-845.668	-297.01	-117.89	-73.6629	-833.458		-127.142	-221.337
906.554	0.906554	26	-274.381	-99.7996	-379.672	21.5139	-406.918	-167.498	-371.821	-360.954	-46.8423	-33.9193	-68.2393	-1436.29	-226.92	-39.6739	-132.382			-103.205	-257.999	-419.228	-519.493	-280.042	-482.668	-1258.26	-43.34	-265.888	-845.241	-316.82	-121.842	-86.3458	-786.198		-151.918	-280.042
107.762	0.107762	27	-274.18	-98.9247	-395.031	21.0945	-425.796	-166.116	-350.004	-380.709	-45.3454	-31.8852	-69.435	-1414.85	-228.009	-41.5189	-128.4			-97.5641	-267.077	-426.67	-232.875	-378.828	-503.477	-1259.58	-43.1593	-302.972	-870.804	-330.344	-120.047	-73.5903	-732.771		-170.796	-378.828
		28	-87.3229	-101.182	-418	22.0981	-444.04	-166.242	-301.616	-396.877	-48.2709	-35.3665	-67.3895	-1404.44	-231.572	-42.416	-129.485			-93.3394	-274.69	-427.94	-581.823	-524.158	-526.649	-1206.88	-43.778	-349.877	-898.397	-352.711	-121.796	-78.6153	-693.411		-189.04	-524.158
0.00529273		29	-81.353	-99.4871	-424.669	17.1971	-454.026	-162.862	-297.366	-391.739	-48.9032	-47.6539	-67.149	-1444.46	-234.002	-45.442	-134.681			-92.1565	-289.12	-423.16	-775.174	-702.438	-609.358	-1182.95	-45.6024	-388.967	-909.678	-378.01	-135.187	-75.4103	-648.14		-199.026	-702.438
		30	-97.6836	-100.869	-429.35	11.9461	-462.415	-159.979	-282.262	-403.97	-49.7887	-67.5071	-64.9141	-1450	-237.799	-47.1543				-88.0959	-307.397	-428.987	-414.875	-801.892	-639.212	-1184.51	-46.175	-441.607	-928.982	-401.801	-180.269	-75.711	-610.973		-207.415	-801.892
		31	-124.127	-102.462	-415.363	1.86166	-468.79	-155.632	-250.776	-411.609	-49.2522	-110.753	-63.103	-1471.91	-239.056	-43.5489				-84.0115	-324.005	-407.849	-361.122	-850.121	-678.258	-1197.29	-70.5567	-556.801	-950.832	-425.025	-256.867	-80.7314	-570.938		-213.79	-850.121
		32	-260.672	-102.157	-411.763	-5.55984	-476.015	-152.881	-180.369	-412.313	-50.6642	-161.692	-67.2261	-1465.46	-241.609	-49.3056				-85.7562	-347.201	-430.93	-331.92	-853.267	-731.514	-1184.75	-123.695	-661.279	-966.476	-447.033	-426.582	-84.3339	-550.368		-221.015	-853.267
		33	-304.018	-101.134	-409.866	-17.824	-484.225	-150.005	-180.076	-399.209	-51.242	-217.929	-64.8207	-1456.8	-242.28	-50.1647				-82.8964	-374.773	-458.787	-310.963	-823.896	-782.449	-1091.11	-219.117	-711.265	-976.776	-470.796	-751.616	-94.9683	-518.377		-229.225	-823.896
		34	-370.89	-99.4036	-403.323	-32.3462	-494.423	-136.425	-203.207	-388.475	-55.0629	-290.743	-68.6201	-1441.22	-244.904	-55.079				-82.496	-402.372	-501.73	-295.599	-798.495	-834.356	-1132.36	-548.463	-735.869	-978.017	-490.664	-836.453	-92.9933	-495.283		-239.423	-798.495
		35	-582.013	-99.9861	-395.681	-45.2883	-497.904	-131.309	-251.938	-390.355	-57.2454	-383.324	-67.1197	-1417.59	-249.426	-50.3707				-78.9449	-430.656	-565.712	-280.582	-744.352	-878.371	-1141.37	-729.522	-750.683	-973.375	-509.354	-923.353	-95.2257	-449.146		-242.904	-744.352
		36	-680.416	-100.727	-389.659	-58.3102	-503.288	-128.956	-297.807	-405.623	-59.5981	-533.735	-65.1621	-1401.19	-248.165	-50.6629				-77.0757	-445.864	-603.278	-264.159	-693.042	-908.802	-1201.09	-779.256	-807.877	-984.983	-529.627	-1032.37	-102.84	-429.583		-248.288	-693.042
		37	-721.9	-102.051	-379.098	-75.8153	-504.108	-123.024	-302.795	-412.823	-61.5454	-765.871	-71.3471	-1373.86	-243.561	-56.2827				-74.5157	-458.619	-675.406	-256.692	-640.795	-933.528	-1286.69	-876.432	-852.465	-1023.62	-541.585	-1101.44	-110.984	-417.935		-249.108	-640.795
		38	-722.88	-99.4036	-365.576	-89.7913	-510.53	-115.795	-308.023	-416.418	-65.2051	-879.772	-75.9685	-1367.73	-243.162	-57.0091				-71.4584	-468.83	-722.871	-247.046	-603.08	-954.415		-804.137	-879.552	-1498.43	-554.139	-1148.85	-110.942	-399.391		-255.53	-603.08
		39	-700.847	-98.814	-358.343	-87.0451	-516.638	-114.233	-309.974	-417.18	-67.0276	-906.938	-83.8792	-1369.72	-247.984	-56.8923				-67.2662	-475.29	-776.055	-239.116	-563.014	-958.407		-855.61	-864.537	-1236.05	-553.668	-1178.65	-116.491	-380.938		-261.638	-563.014
		40	-699.04	-100.944	-344.339	-80.6205	-514.465	-109.915	-314.113	-415.117	-68.681	-923.421	-89.0013	-1385.9	-248.019	-60.7045				-66.762	-483.506	-822.052	-233.304	-523.97	-958.75		-803.736	-820.778	-1429.57	-557.929	-1191.72	-121.452	-365.905		-259.465	-523.97
		41	-1080	-100.948	-340.775	-74.7518	-516.252	-106.887	-304.9	-413.884	-70.6295	-942.407	-93.6375	-1375.24	-255.393	-66.351				-63.0413	-481.406	-899.294	-226.091	-488.88	-957.786		-861.514	-775.527	-70.6295	-563.02	-1220.86	-120.504	-356.021		-261.252	-488.88
		42	-1121.54	-101.585	-331.162	-69.0366	-510.14	-104.938	-324.381	-424.844	-72.6172	-968.273	-104.282	-1382.44	-256.953	-75.084				-62.2484	-469.584	-948.255	-216.899	-460.131	-950.297		-815.781	-749.13	-72.6172	-577.686	-1242.23	-126.618	-344.945		-255.14	-460.131
		43	-2000.21	-104.17	-324.072	-66.6215	-506.651	-100.57	-338.606	-416.176	-74.8617	-1004.17	-110.6	-1380.62	-259.802	-90.1531				-60.5302	-464.017	-986.416	-211.224	-430.308	-945.586		-827.71	-764.484	-74.8617	-577.12	-1262.83	-129.468	-329.011		-251.651	-430.308
		44	-1907.67	-107.791	-315.454	-64.8109	-500.223	-98.905	-347.376	-399.563	-76.0241	-998.611	-119.179	-1376.8	-259.812	-103.48				-60.8006	-459.847	-1031.67	-202.212	-396.151	-931.076		-850.952	-782.09	-76.0241	-574.741	-1275.01	-131.67	-319.406		-245.223	-396.151
		45	-1920.2	-114.002	-309.006	-59.1845	-495.539	-96.6853	-363.918	-401.435	-78.3481	-974.156	-118.694	-1369.57	-261.258	-132.297				-57.7536	-457.361	-1056.99	-201.094	-374.5	-917.271		-845.69	-781.396	-78.3481	-581.576	-1299.4	-140.034	-314.261		-240.539	-374.5
		46	-1968.1	-123.452	-304.4	-60.1411	-489.32	-94.3708	-367.288	-421.345	-81.035	-950.823	-129.723	-1383.78	-263.326	-169.754				-56.1874	-451.679	-1063.74	-191.323	-349.451	-913.604		-968.124	-771.119	-81.035	-576.762	-1325	-147.781	-302.348		-234.32	-349.451
		47	-2786.38	-131.638	-298.799	-53.9235	-480.045	-93.3383	-348.139	-431.121	-82.4038	-944.698	-138.409	-1392.6	-274.896	-188.642				-57.187	-444.118	-1058.13	-187.436	-325.406	-899.594		-960.973	-758.039	-82.4038	-568.66	-1332.16	-140.243	-297.915		-225.045	-325.406
		48	-3246.56	-141.2	-288.415	-52.7935	-472.456	-89.7411	-319.419	-432.481	-84.0551	-941.185	-146.362	-1404.29	-270.03	-228.536				-55.5242	-432.263	-1047.85	-181.122	-307.031	-894.694		-912.451	-759.101	-84.0551	-558.934	-1330.7	-146.769	-292.26		-217.456	-307.031
		49	-3292.91	-154.655	-280.253	-46.4402	-464.213	-90.1622	-324.928	-413.385	-87.0224	-937.389	-154.714	-1393.76	-274.58	-273.59				-55.3711	-426.477	-1036.57	-171.511	-287.478	-887.678		-861.689	-734.258	-87.0224	-542.756	-1327.77	-145.447	-312.428		-209.213	-287.478
		50	-3310.2	-163.608	-272.65	-46.5757	-456.181	-86.999	-313.782	-397.161	-88.028	-945.665	-161.209	-1398.31	-273.847	-319.991				-54.0092	-507.06	-1009.35	-167.374	-272.03	-866.908		-852.161	-714.698	-88.028	-536.725	-1338.84	-149.237	-313.694		-201.181	-272.03
		51	-3324.04	-178.06	-269.214	-41.2706	-451.154	-87.2411	-255.703	-385.318	-89.2527	-947.803	-166.852	-1389.79	-269.335	-371.116				-55.1216	-525.992	-975.926	-162.357	-254.032	-852.819		-954.093	-691.052	-89.2527	-521.63	-1348.26	-146.638	-315.724		-196.154	-254.032
		52	-3350.41	-183.484	-262.221	-38.3318	-443.203	-85.474	-263.448	-316.368	-88.4977	-953.165	-168.9	-1395.71	-266.004	-425.619				-54.5848	-528.466	-953.494	-159.727	-241.859	-825.971		-923.63	-664.035	-88.4977	-512.179	-1357.7	-147.584	-304.71		-188.203	-241.859
		53		-188.878	-261.538	-35.404	-431.27	-85.2788	-269.907	-181.297	-91.1006	-948.177	-174.789	-1398.31	-267.825	-480.652				-54.1173	-537.862	-929.033	-158.515	-224.022	-811.224		-890.783	-630.964	-91.1006	-492.783	-1367.74	-142.282	-310.914		-176.27	-224.022
		54		-194.141	-257.912	-36.262	-427.031	-84.7998	-282.71	-172.124	-126.433	-946.636	-174.592	-1397.59	-267.656	-525.424				-52.0021	-538.096	-927.782	-159.214	-212.217	-818.864		-848.96	-594.511	-126.433	-478.764	-1376.46	-145.909	-312.239		-172.031	-212.217
		55		-196.737	-249.049	-33.5915	-420.801	-84.352	-278.846	-167.375	-123.873	-934.437	-175.121	-1410.63	-267.37	-550.381				-51.8633	-537.033	-904.795	-156.316	-201.923	-785.506		-823.793	-573.115	-123.873	-464.142	-1371.81	-146.978	-325.802		-165.801	-201.923
		56		-191.848	-245.806	-31.2194	-412.75	-83.7852	-263.139	-161.832	-124.178	-940.406	-174.334	-1411.99	-272.599	-559.472				-51.2843	-541.045	-892.231	-154.124	-189.877	-738.527		-810.915	-523.641	-124.178	-448.733	-1378.85	-143.86	-334.234		-157.75	-189.877
		57		-188.284	-252.776	-26.2638	-403.511	-81.2032	-279.716	-155.971	-122.528	-943.269	-174.375	-1414.18	-271.658	-561.294				-51.0049	-574.764	-867.098	-154.076	-175.853	-711.268		-797.994	-478.831	-122.528	-435.909		-142.696	-350.989		-148.511	-175.853
		58		-182.231	-250.314	-23.7574	-393.481	-79.6409	-284.424	-149.408	-123.651	-951.507	-175.141	-1439.03	-267.348	-546.096				-51.3211	-592.766	-849.586	-152.34	-169.893	-710.413		-838.548	-432.477	-123.651	-421.293		-145.714	-355.335		-138.481	-169.893
		59		-178.099		-18.653	-389.508	-80.3446	-292.098	-146.43	-123.796	-952.434	-176.294	-1412.55	-269.745	-519.921				-50.6429	-639.017	-828.128	-149.837	-155.862	-689.225		-855.024	-397.9	-123.796	-411.067		-155.939	-352.552		-134.508	-155.862
		60		-170.107		-15.8677	-379.419	-80.5787	-277.096	-136.603	-124.858	-954.445	-172.198	-1426.9	-271.334	-487.319				-51.145	-891.09	-811.064	-148.131	-146.112	-704.814		-804.122	-364.467	-124.858	-393.287		-156.161	-354.195		-124.419	-146.112
		61		-164.099		-12.5195	-373.29	-80.7788	-267.393	-134.098	-125.141	-959.004	-174.129	-1446.38	-269.236	-460.532				-51.1024		-805.689	-149.481	-139.062	-720.044		-766.698	-343.224	-125.141	-379.397		-150.119	-345.625		-118.29	-139.062
		62		-158.406		-10.1799	-365.483	-78.2722	-264.785	-128.494	-125.722	-969.968	-176.438	-1438.71	-270.651	-430.333				-51.691		-781.21	-147.086	-136.735	-738.832		-729.589	-317.057	-125.722	-365.452		-148.783	-336.305		-110.483	-136.735
		63		-149.82		-3.39899	-355.96	-77.6233	-246.675	-123.454	-125.215	-982.631	-172.08	-1436.14	-273.404	-392.15				-51.7582		-778.427	-149.048	-123.71	-832.341		-696.072	-290.208	-125.215	-354.188		-153.364	-329.546		-100.96	-123.71
		64		-145.593		0.0695801	-351.457	-68.662	-251.338	-119.082	-126.338	-1029.59	-166.159	-1443.3	-266.582	-357.022				-52.2473		-768.399	-157.909	-116.061	-853.732		-666.259	-264.979	-126.338	-340.093		-161.144	-341.816		-96.4568	-116.061
		65		-139.707		3.75531	-343.617	-72.8216	-239.909	-114.84	-125.825	-1036.03	-164.935	-1438.48	-262.18	-326.629				-51.0772		-767.522		-105.408	-868.228		-641.971	-240.27	-125.825	-331.628		-177.032	-5128.96		-88.617	-105.408
		66		-138.536		11.6376	-339.687	-73.0406	-236.669	-112.267	-123.808	-1072.6	-160.03	-1439.84	-260.497	-299.063				-50.3333		-752.745		-100.26	-857.825		-612.879	-224.887	-123.808	-380.613		-171.195	2.0741		-84.6868	-100.26
		67		-134.832		14.6677	-333.022	-73.7109	-226.666	-111.022	-121.417	-1110.56	-153.698	-1449.11	-258.688	-276.592				-50.9442		-732.374		-91.9317	-844.255		-584.513	-206.282	-121.417	-537.421		-168.368	-8.16837		-78.0216	-91.9317
		68		-127.43		19.1645	-328.888	-71.7939	-214.718	-103.196	-120.783	-1152.62	-155.6	-1434.91	-259.184	-257.215				-52.5827		-716.191		-94.2169	-921.316		-558.353	-189.007	-120.783	-689.23		-157.68	10.9372		-73.8875	-94.2169
		69		-126.644		21.4828	-322.884	-72.7681	-199.412	-101.879	-119.991	-1181.41	-149.029		-267.299	-235.843				-50.9321		-701.086		-79.5234	-958.711		-533.212	-178.396	-119.991	-822.806		-156.284	1.97577		-67.8844	-79.5234
		70		-121.136			-318.022	-72.562	-179.774	-96.6496	-120.063	-1187.9	-147.617		-264.284	-219.832				-50.3723		-699.344		-72.7639	-910.591		-504.456	-96.6496	-120.063	-703.026		-152.867	9.63232		-63.022	-72.7639
		71		-118.211			-313.63	-74.3454	-171.38	-91.9619	-121.324	-1184.92	-142.706		-270.689	-205.747				-49.5761		-702.604		-64.7152	-974.005		-481.22	-91.9619	-121.324	-669.923		-154.113	1.64899		-58.6304	-64.7152
		72		-114.478			-308.302	-70.9922	-163.12	-88.4248	-121.874	-1174.77	-141.989		-271.233	-194.063				-50.8924		-718.395			-1175.06		-450.695	-88.4248	-121.874	-661.628		-159.66	1.64771
		73		-114.487			-301.724	-70.4217	-135.552	-87.508	-119.859	-1167.62	-140.135		-267.765	-181.992				-52.6042		-719.546			-2020.62		-435.846	-87.508	-119.859	-673.975		-154.804	1.95944
		74		-111.444			-299.413	-72.1681	-135.165		-122.838	-1156.76	-139.242		-272.294	-170.098				-50.3919		-716.343			-3406.5		-390.814		-122.838	-645.776		-157.211	1.9783
		75		-110.214			-295.131	-65.2111	-138.179		-125.062		-135.397		-272.381	-160.451				-50.1571		-709.636			-3417.55		-351.677		-125.062	-675.952		-159.978	1.8223
		76		-109.171			-292.052	-65.8499	-159.95		-128.443		-125.577		-270.173	-154.562				-50.7578		-721.388			-3321.66		-315.167		-128.443	-1184.45		-159.241	1.95297
		77		-110.328			-290.855	-65.9847	-186.366		-129.536		-124.308		-269.749	-143.114				-51.4272		-719.687			-3359.22		-281.731		-129.536	-1160.21		-155.702	1.88953
		78		-104.06			-287.919	-69.161	-175.703		-129.582		-120.619		-266.922	-135.409				-52.329		-733			-3372.4		-251.919		-129.582	-1296.05		-154.099	1.98782
		79		-103.506			-287.943	-71.3745					-116.999		-269.152	-131.476				-53.3905		-737.223			-3408.32		-217.224			-1704.67		-158.771	2.15784
		80		-101.192			-283.165	-66.3233					-117.064		-269.719	-126.862				-52.9507		-712.499					-191.831			-1558.68		-153.131	1.84918
		81		-103.303			-281.733	-66.0431					-112.878		-270.78	-123.616				-51.9914		-713.818					-169.387			-1517.61		-148.967	2.01611
		82		-99.0853			-278.725	-67.4505					-113.964			-120.752				-52.5028		-727.612					-152.103			-1449.29		-151.003	1.94037
		83		-96.5405			-276.903	-66.7574					-108.356			-117.2				-52.8506		-730.244					-134.781			-1524.57		-143.692	1.99448
		84		-97.9318			-273.909	-65.0985					-105.443			-115.386				-52.6585		-728.371					-117.471			-1433.8		-145.63	1.99841
		85		-97.1458				-63.58					-102.224			-114.411				-54.3112		-725.017					-102.088			-1297.72		-151.024	2.01901
		86		-97.6455				-61.6689					-98.4812			-110.393				-55.6054		-721.786					-86.935			-1404.32		-147.642	2.05118
		87		-97.1577				-63.5602					-98.8926			-110.957				-53.0642		-730.023					-72.5396			-1359.73		-147.266	2.09509
		88		-95.4126				-62.4818					-93.7719			-110.92				-52.9353		-732.179					-58.2339					-147.489	2.09494
		89		-95.9971				-62.5139					-92.206			-108.452				-53.2586		-734.197					-45.8716					-140.729	1.94028
		90		-94.1323				-62.029					-89.6264			-105.858						-726.152					-35.9124					-145.578	2.07144
		91		-93.6921				-59.9065					-88.5106			-105.588						-726.054					-24.9742					-140.971	2.03394
		92		-92.6979									-88.7191			-105.49						-734.774					-17.5225					-144.634	2.04605
		93		-90.2275									-83.0795			-103.652											-9.3446					-146.663	1.98059
		94		-93.0799									-81.7763			-103.576											-2.71182					-143.127	2.06775
		95		-90.7829									-80.5439			-100.771											3.97287					-140.859	2.082
		96		-90.7133									-75.1051			-102.803											10.5597					-134.429	1.99173
		97		-88.8992									-72.2501			-101.936																-140.224	1.91525
		98		-88.1921									-70.9042			-107.523																-141.102	3.58331
		99		-88.857									-70.3953			-110.297																-131.161	2.0658
		100		-91.9034									-68.3896			-104.417																-133.223	2.08432
		101		-86.9887									-68.5719			-103.702																-133.689	2.10065
		102		-86.6319									-68.5631			-103.436																-138.286	2.15933
		103		-88.8611									-68.1933			-105.1																-127.135	2.10205
		104		-89.0811									-67.8147			-101.694																-130.171	1.97745
		105		-88.033									-69.1282			-101.789																-138.162	2.00064
		106		-85.5037									-67.1102			-99.7549																-132.579	2.04907
		107		-85.1049									-66.9996			-99.0567																-132.837	2.0318
		108		-83.9099									-64.8378			-100.274																-128.371	2.09601
		109		-85.4683									-65.8302			-101.716																-111.961	2.1651
		110		-84.0559									-58.8738			-101.757																-99.7707	2.14322
		111		-84.5825									-56.385			-100.985																-97.5012	2.06818
		112		-85.3314									-57.1094			-100.869																-94.462	1.99503
		113		-85.8309									-53.7187			-100.024																-91.985	2.04633
		114		-85.0728									-55.8882			-98.4793																-91.3378	2.0549
		115		-84.782									-52.6277			-101.738																-93.8409	2.08047
		116		-85.0489									-54.9387			-100.424																-104.43	2.07864
		117		-82.8807									-52.4225			-98.3921																-115.553	2.14786
		118		-83.6848									-54.8844			-98.5793																-116.038	2.08475
		119		-82.237									-49.8166			-97.7095																-115.3	2.01611
		120		-82.4853									-53.6306			-98.986																-106.076	2.01196
		121		-81.9635									-49.5027			-96.1591																-106.184	2.05603
		122		-83.636									-50.7443																			-111.147	2.04065
		123		-83.4589									-51.7084																			-104.512	2.03137
		124		-82.9214									-50.9643																			-100.674	2.08237
		125		-83.8									-48.8208																			-101.326	2.10748
		126		-84.7144									-48.72																			-102.586	2.04764
		127		-85.0381									-52.6638																			-102.486	2.00128
		128		-84.17									-52.7029																			-96.4652	2.12131
		129		-82.903									-50.6779																			-89.8722	2.12781
		130		-83.4323									-48.2032																			-106.404	2.08444
		131											-52.4057																			-98.4664	2.13354
		132											-48.174																			-86.1708	2.12033
		133											-50.8949																			-87.6304	2.13165
		134											-49.089																			-90.0582	2.07254
		135											-47.1791																			-90.7024	2.0506
		136											-50.114																			-86.0496	2.05878
		137											-49.0681																			-91.2039	2.11935
		138											-49.6776																			-92.5683	2.08191
		139											-50.6143																			-90.4605	2.07617
		140											-48.432																			-88.4027	2.22903
		141											-48.1413																			-91.8504	2.14288
		142											-47.6686																			-91.206	2.07217
		143											-48.6297																				1.96591
		144											-49.194																				1.80991
		145											-49.4927																				2.08057
		146											-49.6004																				1.99493
		147											-49.4922																				2.51788
		148											-51.7118																				2.18652
		149											-110.712																				2.13885
		150											-47.7944																				2.07718
		151											-48.7751																				2.09631
		152											-50.6991																				2.11066
		153											-51.8711																				2.14926
		154											-50.7819																				2.09396
		155											-50.5419																				2.13412
		156											-53.0782																				2.22229
		157											-55.9288																				2.19006
		158											-54.8846																				2.11777
		159											-54.0979																				2.05969
		160											-52.1484																				2.10684
		161											-50.3747																				2.10046
		162											-51.3171																				2.1488
		163											-51.0468																				2.12616
		164											-52.335																				2.20572
		165											-4976.61																				2.17047
		166											-1605.63																				2.12262
		167											-1379.71																				2.13034
		168											-1331.76																				2.17462
		169											-5111.3																				2.19525
		170											2.2861																				2.21802
		171											2.43794																				2.26236
													1.09163																				2.24796
													2.23242																				2.20786
													2.26128																				2.11285
													2.32018																				2.0661
													1.33433																				2.14334
													2.26148																				2.11777
													5.46808																				2.15112
													0.819715																				2.1622
													1.21522																				2.21774
													1.82812																				2.16501
													2.10656																				2.08136
													2.13664																				2.02594
													2.32169																				2.09232
													2.3539																				2.09277
													2.36096																				2.10559
													1.71184																				2.14053
													2.09438																				2.08841
													2.44406																				2.1933
													2.23436																				1.99896
													2.21711																				2.06213
													2.08069																				2.09531
													2.32125																				2.07526
													2.29115																				2.09674
													2.08857																				2.18793
													2.03858																				2.18863
													2.14153																				2.20984
													2.21463																				2.16376
													2.14329																				2.08066
													2.12193																				2.13742
													2.19353																				2.1601
													2.2193																				2.07858
													2.12986																				2.19189
													2.1544																				2.15558
													2.2974																				2.1965
													2.14276																				2.14859
													2.24247																				2.11798
													1.50523																				2.09482
													2.19034																				2.151
													1.9158																				2.10947
													2.09425																				2.18777
													2.22144																				2.14008
													1.96444																				2.21588
													2.18606																				2.1543
													2.09394																				2.07523
																																	2.09381
																																	2.12714
																																	2.06851
																																	2.14429
																																	2.06998
																																	2.1687
																																	2.1239
																																	2.03265
																																	1.96591
																																	2.1012
																																	2.05496
																																	2.09467
																																	2.07983
																																	2.1507
																																	2.11053
																																	2.08569
																																	1.98169
																																	2.11545
																																	2.04532
																																	2.08548
																																	2.05972
																																	2.11758
																																	2.20871
																																	2.12488
																																	2.0434
																																	2.02246
																																	2.05316
																																	2.10275
																																	2.06039
																																	2.13184
																																	2.14981
																																	2.12851
																																	1.9729
																																	2.10275
																																	2.10699
																																	2.10834
																																	2.13461
																																	2.23999
																																	2.18823
																																	2.15491
																																	2.04242
																																	1.99966
																																	2.02039
																																	2.03403
																																	2.02847
																																	2.05713
																																	2.0571
																																	2.11816
																																	2.03546
																																	1.94983
																																	1.94104
																																	2.06387
																																	2.02493
																																	2.13501
																																	2.08374
																																	2.1481
																																	2.04437
																																	2.02155
																																	1.98859
																																	2.01236
																																	2.03635
																																	2.01086
																																	2.05521
																																	2.05072
																																	2.16187
																																	2.05646
																																	2.00168
																																	2.03006
																																	2.01834
																																	2.01846
																																	2.05231
																																	2.11511
																																	2.13626
																																	2.09479
																																	1.99921
																																	1.92862
																																	2.05716
																																	2.02219
																																	2.04486
																																	2.03421
																																	2.07635
																																	2.13449
																																	2.14194
																																	2.06366
																																	2.06885

## Sheet: PPR (G)
	50 ms	100 ms	150 ms			UCSF M211 Control										UCSF M211 Control										UCSF M211 Control										UCSF M211 Control										UCSF M211 Control
Control	9.8458	0.0888	0.0562			2023-06-13										2023-06-13										2023-06-13										2023-06-13										2023-06-13
11, 3	1.0841	0.7386	0.6165			cell 1										cell 2										cell 5										cell 6										cell 7
	0.7577	0.6082	1.9373
	1.1056	0.9737	1.0071
	1.3214	1.0272	0.9278			file number - 23613007			file number - 23613008			file number - 23613009				file number - 23613018			file number - 236130019			file number - 23613020				file number - 236130042			file number - 236130043			file number - 23613044				file number - 23613055			file number - 23613056			file number - 23613057				file number - 23613070			file number - 23613071
	1.714	1.524	1.032					ratio			ratio			ratio				ratio			ratio			ratio				ratio			ratio			ratio				ratio			ratio			ratio				ratio
	0.853	0.994	0.977			-54.6672	-207.695	3.79926	-669.831	-36.0894	0.0538783	-669.831	-79.4293	0.118581		-506.585	-449.768	0.887842	-413.501	-315.426	0.762817	-498.811	-216.805	0.434645		-669.08	-493.506	0.737589	-952.637	-766.163	0.804255	-674.801	-495.25	0.73392		-339.301	-354.411	1.04453	-287.984	-250.562	0.870055	-321.194	-291.504	0.907563		-260.769	-395.203	1.51553	-173.817
	2.021	0.7	0.812			-33.4037	-156.936	4.69817	-721.029	-100.255	0.139044	-721.029	-22.4365	0.0311174		-401.912	-389.615	0.969404	-463.328	-374.296	0.807842	-333.601	-322.09	0.965492		-720.158	-521.403	0.724012	-551.278	-426.471	0.773605	-721.137	-177.63	0.246319		-297.689	-320.841	1.07777	-274.387	-290.833	1.05994	-293.362	-276.306	0.94186		-225.416	-284.678	1.2629	-168.578
	1.588	1.213	1.102			-8.09152	-170.245	21.04	-789.334	-57.9279	0.0733884	-789.334	-14.8035	0.0187544		-340.177	-474.613	1.39519	-481.013	-310.259	0.645011	-425.062	-190.964	0.449262		-790.043	-641.235	0.811646	-641.841	-158.3	0.246635	-166.473	-804.32	4.83153		-258.016	-308.228	1.19461	-280.242	-277.735	0.991056	-253.92	-297.587	1.17197		-187.512	-222.346	1.18577	-170.073
	1.38772	1.13149	1.49562					9.84581			0.0887703			0.0561509				1.08415			0.738557			0.616466				0.757749			0.608165			1.93726				1.10564			0.973682			1.00713				1.3214
	1.04982	1.02915	0.629395
KO	11.6169	2.0256	0.8003
13, 4	1.6172	1.2731	0.9343					.
	0.9791	1.1156	1.1586
	3.9248	1.8827	2.1956
	0.427848	0.414007	0.74528
	0.719463	0.728354	0.870244
	6.85528	3.16795	1.86111
	3.20413	2.44029	0.989263
	0.917369	0.80155	0.666232
	1.17071	1.13054	1.04651
	1.48829	1.28665	0.787803
	0.895583	0.94133
	2.02001	1.55294	1.57936
Control	2.06619	0.911649	0.962992
KO	2.75667	1.44312	1.13622
ttest	0.572522	0.0474837	0.401425
[truncated: 174 more columns]
