# Supplementary material for: Prosapip1 (encoded by the Lzts3 gene) in the dorsal hippocampus mediates synaptic protein composition, long-term potentiation, and spatial memory
Source: eLife journal article supplement (doi:10.7554/elife.100653), 2024-10-03
Supplement: fig4-data1 [file Figure 4 - Source Data 1.xlsx]

## Sheet: Figure 4A 
4A - Object Interaction Time
Prosapip1(flx/flx);Syn1-Cre(-)		Prosapip1(flx/flx);Syn1-Cre(+)
Familiar	Novel	Familiar	Novel
2.72	17.32	12	8.04
6.16	13.88	10.04	10
4.24	15.8	6.48	13.56
6.84	13.2	10.52	9.52
7.88	12.16	13.8	6.24
6.44	13.6	7.6	12.44
2.32	17.72	9.84	10.2
3.6	16.44	13	7.04
3.12	16.92	11.68	8.36
8.72	11.32	4.28	15.76
8.24	11.8	6.12	13.92
7.04	13	8.96	11.08
8.04	12	6.16	13.88
6.08	13.96	9.24	10.8
3.12	16.92	9.68	10.36
3.76	16.28	11.04	9.88
3.32	16.72	9	9
5.92	14.12	9.24	10.8
		8.36	11.68
		10.76	9.28

## Sheet: Figure 4B
	4B - Difference Score
	Prosapip1(flx/flx);Syn1-Cre(-)	Prosapip1(flx/flx);Syn1-Cre(+)
	79.08	-46.28
	46.44	14.36
	55.64	-54.2
	77.64	66.44
	39.4	43.32
	32.84	3.12
	35.24	29.56
	95.4	-46.44
	74.28	-43.16
	70.28	58.36
	91	-8.76
	94.2	-87.48
	35.24	-32.84
	64.44	0.28
	78.36	13.16
	66.28	39.8
	66.84	-80.52
	71.96	39.16
	55.56	14.76
	23.56
	4.68
	56.76

## Sheet: Figure 4 D
4D - Time in Chamber: Sociability
Prosapip1(flx/flx);Syn1-Cre(-)		Prosapip1(flx/flx);Syn1-Cre(+)
Empty	Social	Empty	Social
300.897	302.864	280.164	478.062
390.229	273.631	268.164	397.096
286.897	275.464	249.664	473.329
290.797	358.73	297.864	451.995
259.164	361.73	192.665	486.662
161.798	588.727	241.898	515.628
131.032	651.027	287.797	409.829
219.964	467.629	345.663	372.43
205.265	458.095	275.564	484.095
303.197	339.13	293.23	465.662
267.197	432.496	171.665	608.994
249.498	438.029	328.33	452.429
261.131	436.996	387.896	248.698
216.431	561.361	388.196	361.663
		265.797	433.262
		201.298	497.262
		321.03	349.363

## Sheet: Figure 4E
4E - Time in Chamber: Social Novelty
Prosapip1(flx/flx);Syn1-Cre(-)		Prosapip1(flx/flx);Syn1-Cre(+)
Familiar	Novel	Familiar	Novel
424.162	261.931	281.664	422.329
112.499	531.395	257.664	354.363
234.898	401.929	338.163	376.163
270.931	407.229	306.164	450.029
240.564	478.495	293.964	437.062
254.731	517.228	391.363	357.996
267.964	576.594	282.897	404.996
212.898	473.229	405.429	359.03
243.198	335.063	420.329	318.43
287.164	284.164	328.497	348.863
263.197	233.964	183.298	581.061
321.963	278.131	181.632	383.696
229.298	455.495	308.264	355.863
160.532	655.627	295.33	417.929
		272.564	379.896
		481.862	280.531
		370.463	376.13

## Sheet: Figure 4F
4F - Path to Escape
Trial	Prosapip1(flx/flx);Syn1-Cre(-)									Prosapip1(flx/flx);Syn1-Cre(+)
1	1064.85	1032.98	1178.27	537.677	279.563	334.472	586.278	1687.01	680.939	801.567	1498.67	1325.63	500.214	1361.36	1657.21	660.56	811.142	445.579	808.95	772.369	849.354
2	500.142	449.762	459.104	445.725	430.766	249.718	289.174	441.585	583.998	1048.09	305.16	944.337	648.035	1376.53	706.347	2200.59	1171.87	439.209	534.097	1198.48	1359.75
3	486.808	205.434	450.588	460.06	296.884	407.205	233.852	473.481	484.964	815.566	358.509	852.272	946.149	716.64	1016.29	739.176	1282.55	674.273	718.193	642.803	894.121
4	221.502	322.767	316.167	422.519	203.517	447.737	425.101	123.211	298.555	249.881	1193.54	751.346	621.48	853.584	536.021	623.011	977.607	430.405	1297.38	1068.07	585.349
5	244.91	153.838	367.926	135.588	195.866	404.457	217.641	429.307	307.569	507.416	1133.18	642.632	964.493	750.079	1156.54	499.487	723.233	885.85	504.656	593.876	1140.27
6	189.977	128.832	265.87	275.466	330.462	381.523	350.908	226.057	257.751	691.631	1012.92	693.428	770.905	863.146	413.91	459.21	706.042	331.344	690.748	549.753	1460.82
7	302.147	286.861	301.356	148.039	210.976	665.766	389.165	232.452	159.942	909.221	751.309	448.479	1279.5	768.951	473.829	804.297	715.275	1314.76	812.443	311.806	1172.05
8	315.363	210.183	258.319	208.568	272.125	266.257	565.785	237.975	196.472	748.075	633.388	843.533	773.797	1286.07	634.05	380.42	659.749	287.45	1163.27	822.809	651.529
9	199.332	170.365	370.999	111.442	138.704	512.61	250.473	290.806	227.646	1264.49	1281.4	1336.38	711.304	1513.37	657.531	692.138	1286.86	496.418	730.248	639.538	494.634
10	392.973	180.491	314.741	144.351	187.668	155.597	260.696	268.636	399.724	388.849	1112.77	1431.74	651.984	281.069	902.043	545.741	639.034	252.314	477.186	1141.23	1126.44
11	210.464	195.123	250.825	89.5	147.111	120.723	254.966	244.848	214.355	378.411	848.07	408.54	1135.44	508.537	336.652	570.892	681.927	251.94	440.741	535.852	1317.68
12	215.607	179.061	180.666	160.381	260.543	212.977	206.948	175.939	196.304	292.589	443.084	404.84	579.658	551.15	1066.98	605.266	248.375	202.918	739.021	1074.42	802.197
13	233.055	184.154	368.034	143.805	244.246	218.04	107.4	92.8602	173.768	335.921	553.724	1219.86	743.35	336.568	507.629	997.19	328.501	147.634	460.437	429.357	1136.95
14	86.6	202.518	172.249	150.347	96.3369	53.6579	415.749	87.6857	293.806	619.818	319.496	494.86	840.836	366.179	487.455	705.508	513.68	321.88	445.424	519.121	211.125
15	152.14	232.558	138.003	135.842	61.0029	386.665	170.268	108.306	146.197	350.976	312.472	319.471	197.456	310.07	728.776	525.795	299.324	271.522	318.098	395.617	728.067
16	126.748	75.5317	96.0519	118.397	118.442	327.927	164.256	68.7537	203.145	264.64	257.281	1086.62	552.96	335.368	511.728	402.531	126.49	182.848	422.277	87.3465	704.364

## Sheet: Figure 4G
4G - Errors
	Primary Errors
Trial	Prosapip1(flx/flx);Syn1-Cre(-)									Prosapip1(flx/flx);Syn1-Cre(+)
1	40	34	30	21	16	17	26	30	22	31	35	32	22	39	39	30	40	25	20	28	34
2	29	26	20	9	20	18	23	22	25	38	20	31	27	38	26	39	32	27	25	31	37
3	31	17	26	16	19	14	19	27	29	34	19	28	33	31	35	29	39	29	25	26	33
4	16	24	17	23	11	22	29	4	9	19	26	34	25	31	27	29	29	26	39	31	22
5	21	10	22	9	13	17	19	21	17	33	24	33	27	31	34	35	26	39	19	19	38
6	16	10	21	8	15	22	18	17	16	32	40	38	23	30	31	33	39	27	28	21	40
7	23	16	20	9	11	22	27	15	14	28	30	28	40	29	26	36	31	39	18	11	40
8	25	18	20	11	24	15	35	14	11	27	21	39	38	32	39	31	27	25	23	40	22
9	18	16	21	7	8	18	19	13	14	31	27	40	24	39	29	34	40	31	19	39	31
10	24	16	18	10	16	15	23	18	16	25	21	37	26	16	26	35	29	24	21	39	38
11	16	17	16	6	7	8	27	13	13	26	16	23	26	18	13	34	32	23	35	36	28
12	16	14	9	10	22	15	10	11	13	26	20	21	23	26	25	26	12	17	20	39	13
13	17	15	25	10	22	17	5	5	13	26	17	29	28	18	25	34	28	14	19	17	28
14	3	14	6	6	5	4	32	4	10	27	17	23	30	27	20	27	24	17	17	40	14
15	7	12	7	5	1	23	13	6	7	26	16	25	7	25	27	27	19	21	18	36	32
16	6	1	7	5	5	18	5	4	12	12	17	39	18	29	10	25	7	14	20	3	27
	Secondary Errors
Trial	Prosapip1(flx/flx);Syn1-Cre(-)									Prosapip1(flx/flx);Syn1-Cre(+)
1	65	64	68	3	4	3	18	130	34	42	117	59	21	69	109	29	34	14	25	17	49
2	12	16	19	1	10	1	0	12	11	44	4	34	18	79	40	155	82	13	11	36	73
3	14	0	10	3	0	0	0	18	4	34	8	11	39	17	43	40	90	38	21	17	40
4	1	0	3	2	4	9	3	0	5	0	86	21	28	27	10	32	65	16	75	33	19
5	1	0	3	2	0	16	0	6	0	10	84	14	49	44	69	12	44	51	20	0	55
6	0	0	0	5	1	10	0	4	4	32	55	15	49	42	4	11	31	5	30	2	73
7	1	8	5	3	2	25	1	8	0	52	44	1	59	29	14	41	39	83	52	3	61
8	5	0	0	5	0	0	19	9	2	43	39	19	20	57	15	7	31	3	76	30	25
9	0	0	9	0	0	9	1	13	0	95	89	89	27	79	24	32	95	16	35	14	12
10	10	0	1	2	0	0	0	3	3	3	72	51	14	1	40	17	32	0	17	36	58
11	0	0	0	0	0	0	0	1	1	3	62	1	62	11	6	15	38	1	2	9	81
12	1	0	1	1	0	0	0	3	0	1	15	13	12	23	45	24	7	2	42	43	52
13	3	0	1	1	0	0	1	0	0	0	27	74	27	3	21	63	0	0	11	14	72
14	0	0	2	1	0	0	9	1	0	30	1	16	40	4	9	34	8	2	14	6	2
15	0	3	0	1	0	7	0	0	0	2	4	0	3	5	32	20	4	2	6	1	24
16	0	0	1	0	2	1	0	2	0	2	8	28	23	1	1	10	1	0	20	0	33

## Sheet: Figure 4I
4I - Search Strategy Ratio - Prosapip1(flx/flx);Syn1-Cre(-)
Trial	Serial	Random	Spatial
1	0.222222	0.777778	0
2	0.666667	0.333333	0
3	0.666667	0.222222	0.111111
4	0.666667	0.111111	0.222222
5	0.777778	0.111111	0.111111
6	0.888889	0	0.111111
7	0.777778	0.111111	0.111111
8	1	0	0
9	0.666667	0.111111	0.222222
10	0.888889	0	0.111111
11	0.666667	0	0.333333
12	0.555556	0	0.444444
13	0.666667	0	0.333333
14	0.222222	0	0.777778
15	0.222222	0	0.777778
16	0.222222	0	0.777778

## Sheet: Figure 4J
4I - Search Strategy Ratio - Prosapip1(flx/flx);Syn1-Cre(+)
Trial	Serial	Random	Spatial
1	0.083333	0.916667	0
2	0.166667	0.833333	0
3	0.083333	0.916667	0
4	0.166667	0.833333	0
5	0.25	0.75	0
6	0.25	0.75	0
7	0.25	0.75	0
8	0.25	0.75	0
9	0.25	0.75	0
10	0.583333	0.416667	0
11	0.583333	0.416667	0
12	0.583333	0.416667	0
13	0.5	0.5	0
14	0.833333	0.166667	0
15	0.75	0.166667	0.083333
16	0.666667	0.166666	0.166667

## Sheet: Figure 4K
4K - Time Spent in Exit Quartile
Prosapip1(flx/flx);Syn1-Cre(-)	Prosapip1(flx/flx);Syn1-Cre(+)
133.632	88.5991
121.332	78.0992
120.732	85.4991
113.766	4.49995
116.099	82.4992
63.2994	57.6994
103.632	79.3992
138.799	84.2992
140.265	91.8991
	61.1327
	85.4991
	23.0664
