# Supplementary material for: Prosapip1 (encoded by the Lzts3 gene) in the dorsal hippocampus mediates synaptic protein composition, long-term potentiation, and spatial memory
Source: eLife journal article supplement (doi:10.7554/elife.100653), 2024-10-03
Supplement: fig4-figsupp1-data1 [file Figure 4 - Figure Supplement 1 - Source Data 1.xlsx]

## Sheet: Figure 4 - Supplement 1 A
	4B - Barnes Maze Habituation
	Prosapip1(flx/flx);Syn1-Cre(-)	Prosapip1(flx/flx);Syn1-Cre(+)
	1565.7	489.078
	260.552	1590.07
	864.497	1503.43
	293.503	697.104
	1744.13	1826.09
	1031.67	575.799
		690.618
		1935.44
		897.986
		1303.06
		255.75
		679.346

## Sheet: Figure 4 - Supplement 1B
Extended 4B - Ligh/Dark Chamber Time
Prosapip1(flx/flx);Syn1-Cre(-)		Prosapip1(flx/flx);Syn1-Cre(+)
Dark	Light	Dark	Light
416.4	183.64	371.96	227.2
419.64	161.68	420.28	176.76
532.4	67.12	450.12	149.72
488.84	110.32	470	129.4
313.56	286.44	306.24	293.2
396	203.84	417.08	182
451.92	147.84	415.8	183.68
302.92	296.2	484.48	114.16
465.04	125.4	425.88	173.48
249.76	349.96	383.68	215.44
372.64	227	404.4	194.44
437.92	161.88	337.08	262.48
435.16	164.8	373.28	226.4
450.52	149.4	455.8	143.68
427.88	171.68	358.24	240.04
		395.36	204.2

## Sheet: Figure 4 -Supplement 1C
Extended C - Open Arm Time
Prosapip1(flx/flx);Syn1-Cre(-)	Prosapip1(flx/flx);Syn1-Cre(+)
25.2997	2.19998
63.0994	15.8998
38.033	55.8994
62.266	61.8994
74.7326	45.9662
71.4993	12.5332
61.4327	59.0661
	14.9998
	27.9997
	44.5662
	65.5327
	34.9663
	86.7991
	60.9661
	165.532
	86.7325
	25.9997
