# Supplementary material for: Prosapip1 (encoded by the Lzts3 gene) in the dorsal hippocampus mediates synaptic protein composition, long-term potentiation, and spatial memory
Source: eLife journal article supplement (doi:10.7554/elife.100653), 2024-10-03
Supplement: fig5-data1 [file Figure 5 - Source Data 1.xlsx]

## Sheet: Figure 5C
	5C - Locomotion
	AAV-GFP	AAV-Cre
	10700	10758.1
	11771.3	15192.3
	12929.4	16726.9
	14832.8	19880.8
	12815.1	16114.5
	15221.3	15591.5
	11459.7	15413.6
	11661.7	12046.5
	13544.8	13630.6
	11264.4	11980
	11599.3	10120.9
	11130.5	15628.8
	14550.2	10232.4
	8530.03	13937.8
	15507.3	13815.7
	18032.7
	11069.7
	7591.12
	8885.62

## Sheet: Figure 5D
	5D - Time in Center
	AAV-GFP	AAV-Cre
	235.04	167.6
	189.68	206.96
	186.36	240.2
	238	145.12
	184.72	120.16
	157.68	78.64
	269.36	201.16
	279.72	235.68
	154.36	137.84
	206.48	152.32
	190.68	144.52
	106.2	88.8
	151.96	311.36
	76.56	235.88
	164.04	199.32
	212.92
	271.88
	210.48
	326.08

## Sheet: Figure 5E
5E - Light/Dark Chamber Time
AAV-GFP		AAV-Cre
Dark	Light	Dark	Light
379.48	220.44	423.04	176.6
467.2	132.44	442.76	121.88
385.72	214.04	322.64	224.48
302.08	238.4	418.64	160.72
325.92	243.2	386.28	212.76
326.08	273.28	198.64	401.16
471.229	128.632	288.964	310.397
363.896	235.731	367.196	231.298
291.397	308.197	468.429	130.799
405.463	193.598	343.08	192.24
377.13	221.698	290	262.2
501.88	97.36	426.2	173.72
510.8	88.68	485.562	113.832
354.24	245.36	368.03	230.731
351.72	247.96	302.33	296.364
356.24	243.44
389.496	209.431
338.497	260.564
383.496	216.098

## Sheet: Figure 5F
5F - Object Interaction Time
AAV-GFP		AAV-Cre
Familiar	Novel	Familiar	Novel
10.56	9.48	10.68	9.36
6.72	13.32	7.48	12.56
8.48	11.6	9.52	10.52
5.44	14.6	11.36	8.68
7.6	12.44	8.92	11.12
7.04	13	9.16	10.88
5	15.04	15.08	4.96
5.6	14.44	9.2	10.84
6.56	13.48	6.44	13.6
5.92	14.12	11	9
4.32	15.72	10.8	9.24
4.52	15.52	10.48	9.56
3.84	16.2	8.76	11.28
3.68	16.36	9.28	10.76
6.44	13.6	10.08	9.92
6.16	13.88	8.96	11.08
		12.52	7.52

## Sheet: Figure 5G
	5G - Difference Score
	AAV-GFP	AAV-Cre
	94.28	34.28
	102.48	66.6
	68.36	-22.52
	107.8	54.12
	66.36	-79.32
	-0.68	14.2
	21.0666	21.6
	98.9334	4
	106.666	1.6
	65.0665	-80.84
	120	-26.12
	12.84	11.56
	63.4	15.7333
	35.16	57.3332
	74.52	82.1334
	61.8665
	17.6
	96.7997

## Sheet: Figure 5H
5H - Time in Chamber: Sociability
AAV-GFP		AAV-Cre
Empty	Social	Empty	Social
294.33	468.629	360.096	394.896
389.929	403.996	341.263	398.729
367.663	376.163	310.364	464.295
313.164	411.663	350.363	418.862
321.563	375.93	232.898	427.362
208.798	519.795	233.998	539.328
269.531	444.196	280.864	483.995
222.964	447.729	272.597	457.862
314.53	447.929	194.965	537.295
300.064	380.43	369.163	329.263
308.297	413.096	449.796	224.698
375.463	365.43	385.029	347.063
240.431	518.228	286.097	453.562
248.798	472.895	221.031	547.095
206.498	589.027	334.73	395.263
290.33	409.863
342.397	429.096
129.699	628.394

## Sheet: Figure 5I
5I - Time in Chamber: Social Novelty
AAV-GFP		AAV-Cre
Familiar	Novel	Familiar	Novel
271.497	436.429	420.896	310.664
386.829	365.063	366.996	379.096
293.83	462.029	437.062	301.03
282.497	268.331	231.898	571.728
402.463	295.864	164.232	553.861
257.997	459.229	200.798	575.694
348.097	426.462	320.197	337.197
288.63	501.495	313.664	398.729
360.696	411.629	154.932	567.428
357.063	384.463	378.73	324.93
225.231	545.195	426.462	258.931
450.295	283.43	403.829	357.13
245.531	532.361	319.963	392.196
182.332	484.662	253.897	553.561
310.53	421.862	419.562	293.764
400.196	272.764
286.497	444.296
157.098	541.328

## Sheet: Figure 5J
5J - Path to Escape
Trial	AAV-GFP								AAV-Cre
1	1138.43	432.711	866.622	218.371	839.939	383.184	544.611	916.874	988.122	713.943	563.078	1286.35	1504.9	1556.72
2	1034.79	911.584	755.73	1296.47	327.573	420.07	522.964	190.74	657.092	799.597	120.897	803.051	503.758	1366.1
3	347.875	426.615	128.701	333.404	178.177	529.232	356.703	121.678	414.149	391.184	717.571	389.924	171.089	1007.62
4	832.711	97.3906	435.318	565.311	681.63	99.6627	416.452	445.735	397.982	902.639	448.51	681.435	769.984	706.367
5	401.256	350.857	115.194	237.236	197.988	130.303	531.904	165.353	400.914	1317.39	592.972	490.701	1292.3	1740.33
6	376.705	116.233	146.572	483.461	413.39	297.429	341.46	87.372	488.992	785.905	444.348	457.42	626.357	1128.06
7	334.612	362.938	367.957	377.561	148.498	279.727	505.298	418.275	402.107	683.815	417.022	620.548	678.239	1197.1
8	1227.5	237.823	420.278	166.462	804.988	351.142	483.327	229.312	1108.07	722.371	133.813	846.182	1125.81	912.472
9	700.139	479.789	324.097	402.793	374.885	385.156	302.344	262.292	452.969	1090.31	446.105	1026.11	1148.57	1759.31
10	73.8623	424.852	150.32	256.477	123.841	250.952	235.426	324.41	919.392	106.149	1196.87	1529.72	585.003	1599.58
11	506.786	305.096	291.221	229.439	171.211	234.44	101.473	71.1546	749.473	410.525	338.588	233.574	325.509	571.037
12	128.601	343.222	130.023	211.606	310.909	89.0381	235.23	139.582	372.549	262.939	232.364	306.022	645.775	801.59
13	124.212	333.308	166.731	117.106	264.239	357.527	246.365	89.6853	321.597	137.311	486.424	401.781	942.848	798.611
14	91.4254	342.651	227.179	159.576	141.48	267.703	92.178	182.501	856.054	380.572	332.753	951.067	958.136	379.456
15	124.399	89.3908	292.776	102.544	126.766	370.231	84.951	90.6934	987.207	110.234	343.076	330.629	453.692	407.905
16	75.9132	107.922	386.823	158.315	407.359	291.795	145.944	110	97.3214	135.313	448.028	693.208	1110.99	178.702

## Sheet: Figure 5K
	5K - Time Spent in Exit Quartlie
	AAV-GFP	AAV-Cre
	137.499	54.8661
	123.265	57.5661
	101.132	68.5993
	98.899	62.3994
	92.5657	48.9662
	103.266	102.266
	133.432
	158.898
