# Supplementary material for: Prosapip1 (encoded by the Lzts3 gene) in the dorsal hippocampus mediates synaptic protein composition, long-term potentiation, and spatial memory
Source: eLife. 2025 Nov 26;13:RP100653. doi: 10.7554/eLife.100653 (PMC12656493; doi:10.7554/eLife.100653)
Supplement: Figure 2—figure supplement 1—source data 1. [file elife-100653-fig2-figsupp1-data1.xlsx]

## Sheet: Sheet1
		Figure 3, Figure supplement 2, Source Data 1. Original membranes corresponding to Figure supplement 2. Fractions are labeled.
