# Supplementary material for: Prosapip1 (encoded by the Lzts3 gene) in the dorsal hippocampus mediates synaptic protein composition, long-term potentiation, and spatial memory
Source: eLife. 2025 Nov 26;13:RP100653. doi: 10.7554/eLife.100653 (PMC12656493; doi:10.7554/eLife.100653)
Supplement: Figure 2—source data 1. [file elife-100653-fig2-data1.xlsx]

## Sheet: SPAR
2B - Total SPAR			2C - Synaptic SPAR
Prosapip1(flx/flx);Syn1-Cre(-)	Prosapip1(flx/flx);Syn1-Cre(+)		Prosapip1(flx/flx);Syn1-Cre(-)	Prosapip1(flx/flx);Syn1-Cre(+)
105.452	72.5172		106.24	61.2698
104.99	69.5795		126.641	35.587
76.9879	70.9458		113.543	34.4262
103.114	112.271		72.2298	35.805
109.456	99.4039		81.3461	39.5367
2F - Total Shank3			2G - Synaptic Shank3
Prosapip1(flx/flx);Syn1-Cre(-)	Prosapip1(flx/flx);Syn1-Cre(+)		Prosapip1(flx/flx);Syn1-Cre(-)	Prosapip1(flx/flx);Syn1-Cre(+)
82.3857	89.1801		130.936	111.576
102.329	73.8093		114.375	110.153
107.639	73.3711		117.716	69.9472
101.121	108.573		67.5267	88.1735
106.525	99.2013		69.4454	110.007
2H - Total PSD-95			2I - Synaptic PSD-95
Prosapip1(flx/flx);Syn1-Cre(-)	Prosapip1(flx/flx);Syn1-Cre(+)		Prosapip1(flx/flx);Syn1-Cre(-)	Prosapip1(flx/flx);Syn1-Cre(+)
64.2492	89.8507		121.393	48.8417
91.9005	111.182		92.6281	81.6547
111.456	127.304		91.5617	43.9729
135.148	124.94		65.8703	27.0853
129.669	146.091		75.6044	58.8917
73.463	74.515		110.889	38.8728
96.9946	69.016		138.055	11.9889
107.911	67.9386		100.631	14.478
89.2087	50.9011		103.368	35.2474
	66.1301			39.1665
2L - Total GluN2A			2M - Synaptic GluN2A
Prosapip1(flx/flx);Syn1-Cre(-)	Prosapip1(flx/flx);Syn1-Cre(+)		Prosapip1(flx/flx);Syn1-Cre(-)	Prosapip1(flx/flx);Syn1-Cre(+)
86.7828	113.143		112.907	85.1525
84.3306	100.07		108.287	84.6045
105.693	92.5761		86.069	106.252
123.194	102.013		92.7366	98.959
	86.884			134.856
2N - Total GluN2B			2O - Synaptic GluN2B
Prosapip1(flx/flx);Syn1-Cre(-)	Prosapip1(flx/flx);Syn1-Cre(+)		Prosapip1(flx/flx);Syn1-Cre(-)	Prosapip1(flx/flx);Syn1-Cre(+)
109.329	58.7789		103.255	25.1467
104.577	86.9307		107.647	39.3276
116.817	95.9297		106.149	59.0656
69.2773	91.3731		82.9484	58.8973
	46.0482			10.3218
2P - Total GluA1			2Q - Synaptic GluA1
Prosapip1(flx/flx);Syn1-Cre(-)	Prosapip1(flx/flx);Syn1-Cre(+)		Prosapip1(flx/flx);Syn1-Cre(-)	Prosapip1(flx/flx);Syn1-Cre(+)
101.281	133.31		108.978	97.5558
83.2715	117.819		109.106	84.7567
124.866	107.576		82.0003	108.79
90.5815	70.0921		99.9159	111.944
	84.5209			153.307
